# Supplementary material
Source: PubMed Central journal article supplement (PMC9251325)
Supplement: mmc1.pdf [file mmc1.pdf]

**Supplemental information**

**A diabetic milieu increases ACE2 expression and cellular susceptibility to SARS-CoV-2 infections in human kidney organoids and patient cells**

**Elena Garreta, Patricia Prado, Megan L. Stanifer, Vanessa Monteil, Andrés Marco, Asier Ullate-Agote, Daniel Moya-Rull, Amaia Vilas-Zornoza, Carolina Tarantino, Juan Pablo Romero, Gustav Jonsson, Roger Oria, Alexandra Leopoldi, Astrid Hagelkruys, Maria Gallo, Federico González, Pere Domingo-Pedrol, Aleix Gavaldà, Carmen Hurtado del Pozo, Omar Hasan Ali, Pedro Ventura-Aguiar, Josep María Campistol, Felipe Prosper, Ali Mirazimi, Steeve Boulant, Josef M. Penninger, and Nuria Montserrat**

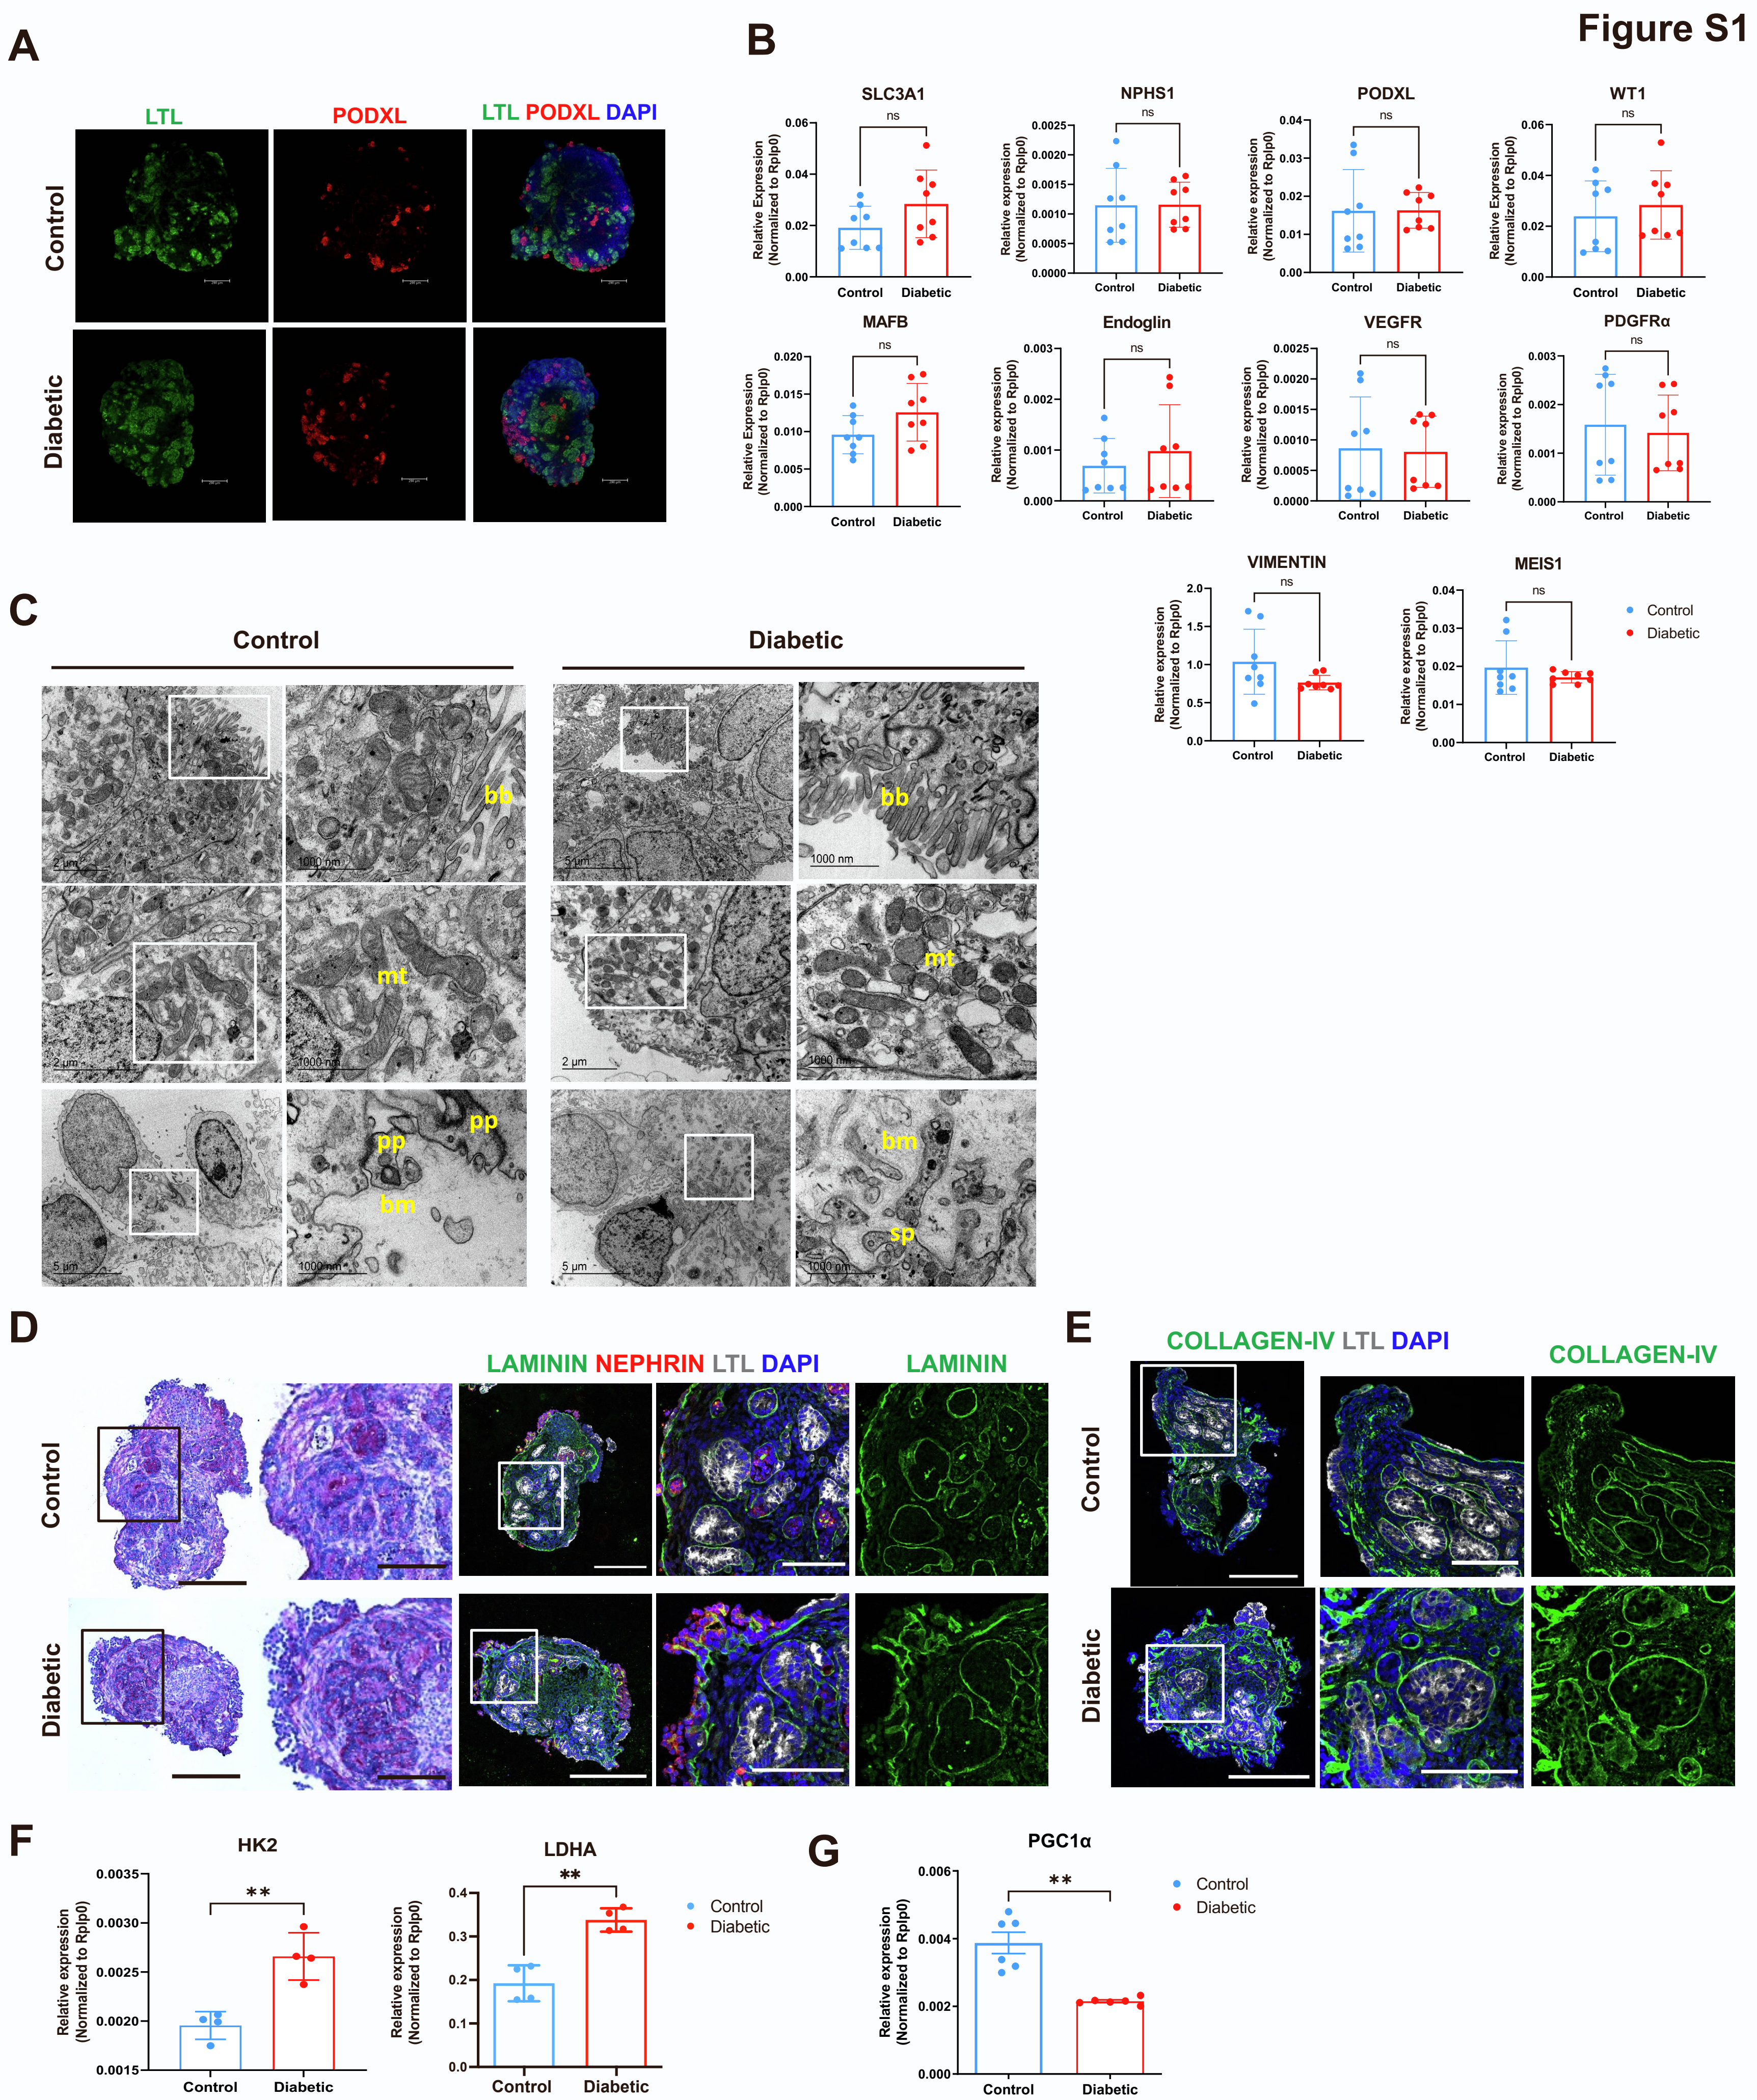

**Figure S1. High Oscillatory Glucose Regime Promotes Diabetogenic-like Responses in Human Kidney Organoids, Related to Figure 1.**

- A) Representative immunofluorescence staining of LTL (green), Podocalyxin (PODXL; red) and DAPI (blue) in kidney organoids cultured under Control or Diabetic conditions for 7 days. Scale bars, 250  $\mu\text{m}$ .
- B) mRNA expression level of proximal tubule markers (*SLC3A1*), podocyte markers (*NPHS1*, *PODXL*, *WT1*, *MAFB*), endothelial-like markers (*Endoglin*, *VEGFR*, *PDGFR $\alpha$* ) and stromal-like markers (*MEIS* and *VIMENTIN*) in Control and Diabetic kidney organoids. The data are represented as mean  $\pm$  s.d.  $n = 4$  independent biological replicates from a pool of 12 organoids/group with at least two technical replicates each; ns, no statistical significance, unpaired Student's *t*-test.
- C) TEM in kidney organoids cultured in Control or Diabetic conditions for 7 days. Magnified views of the boxed regions show details of tubular-like epithelial cell-related structures including brush borders (bb) and high mitochondrial (mit) content (upper and middle panels). Bottom panels show podocyte-related structures, including the deposition of a basement membrane (bm), and primary (pp) and secondary cell processes (sp). Scale bars, 2  $\mu\text{m}$  and 5  $\mu\text{m}$ ; 1000 nm (magnified views).
- D) Representative Periodic Acid-Schiff (PAS) staining in Control and Diabetic kidney organoids. Scale bars, 250  $\mu\text{m}$ , 100  $\mu\text{m}$  (magnified views). Consecutive sections were stained for LAMININ (green), NEPHRIN (red), LTL (grey) and DAPI (blue). Scale bars, 250  $\mu\text{m}$ , 100  $\mu\text{m}$  (magnified views).
- E) Representative immunofluorescence staining of COLLAGEN-IV (green) LTL (grey) and DAPI (blue) in Control and Diabetic kidney organoids. Scale bars, 250  $\mu\text{m}$ , 100  $\mu\text{m}$  (magnified views).
- F) mRNA expression level of glycolytic enzymes (*HK2* and *LDHA*) in Control and Diabetic kidney organoids. The data are represented as mean  $\pm$  s.d.  $n = 2$  independent biological replicates per condition with at least two technical replicates each.  $**P < 0.01$ , unpaired Student's *t*-test.
- G) mRNA expression level of *PGC1 $\alpha$*  in Control and Diabetic kidney organoids. The data are represented as mean  $\pm$  s.d.  $n = 3$  independent biological replicates per condition with at least two technical replicates each. ns, no statistical significance,  $**P < 0.01$ , unpaired Student's *t*-test.

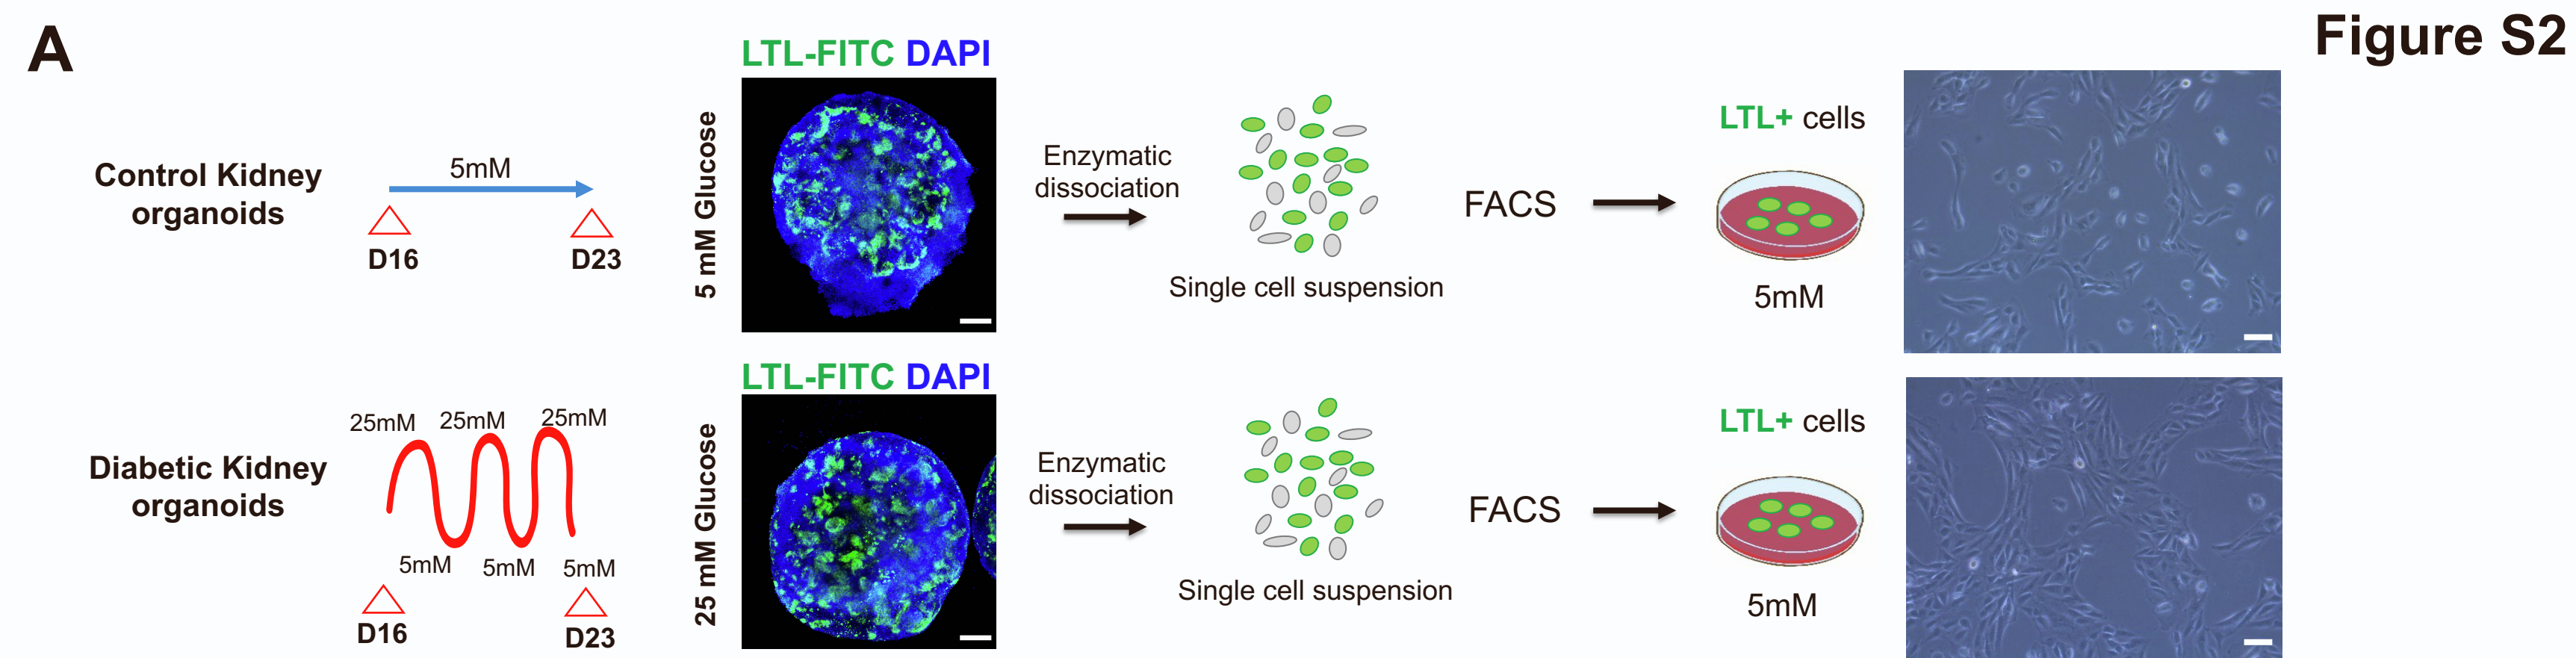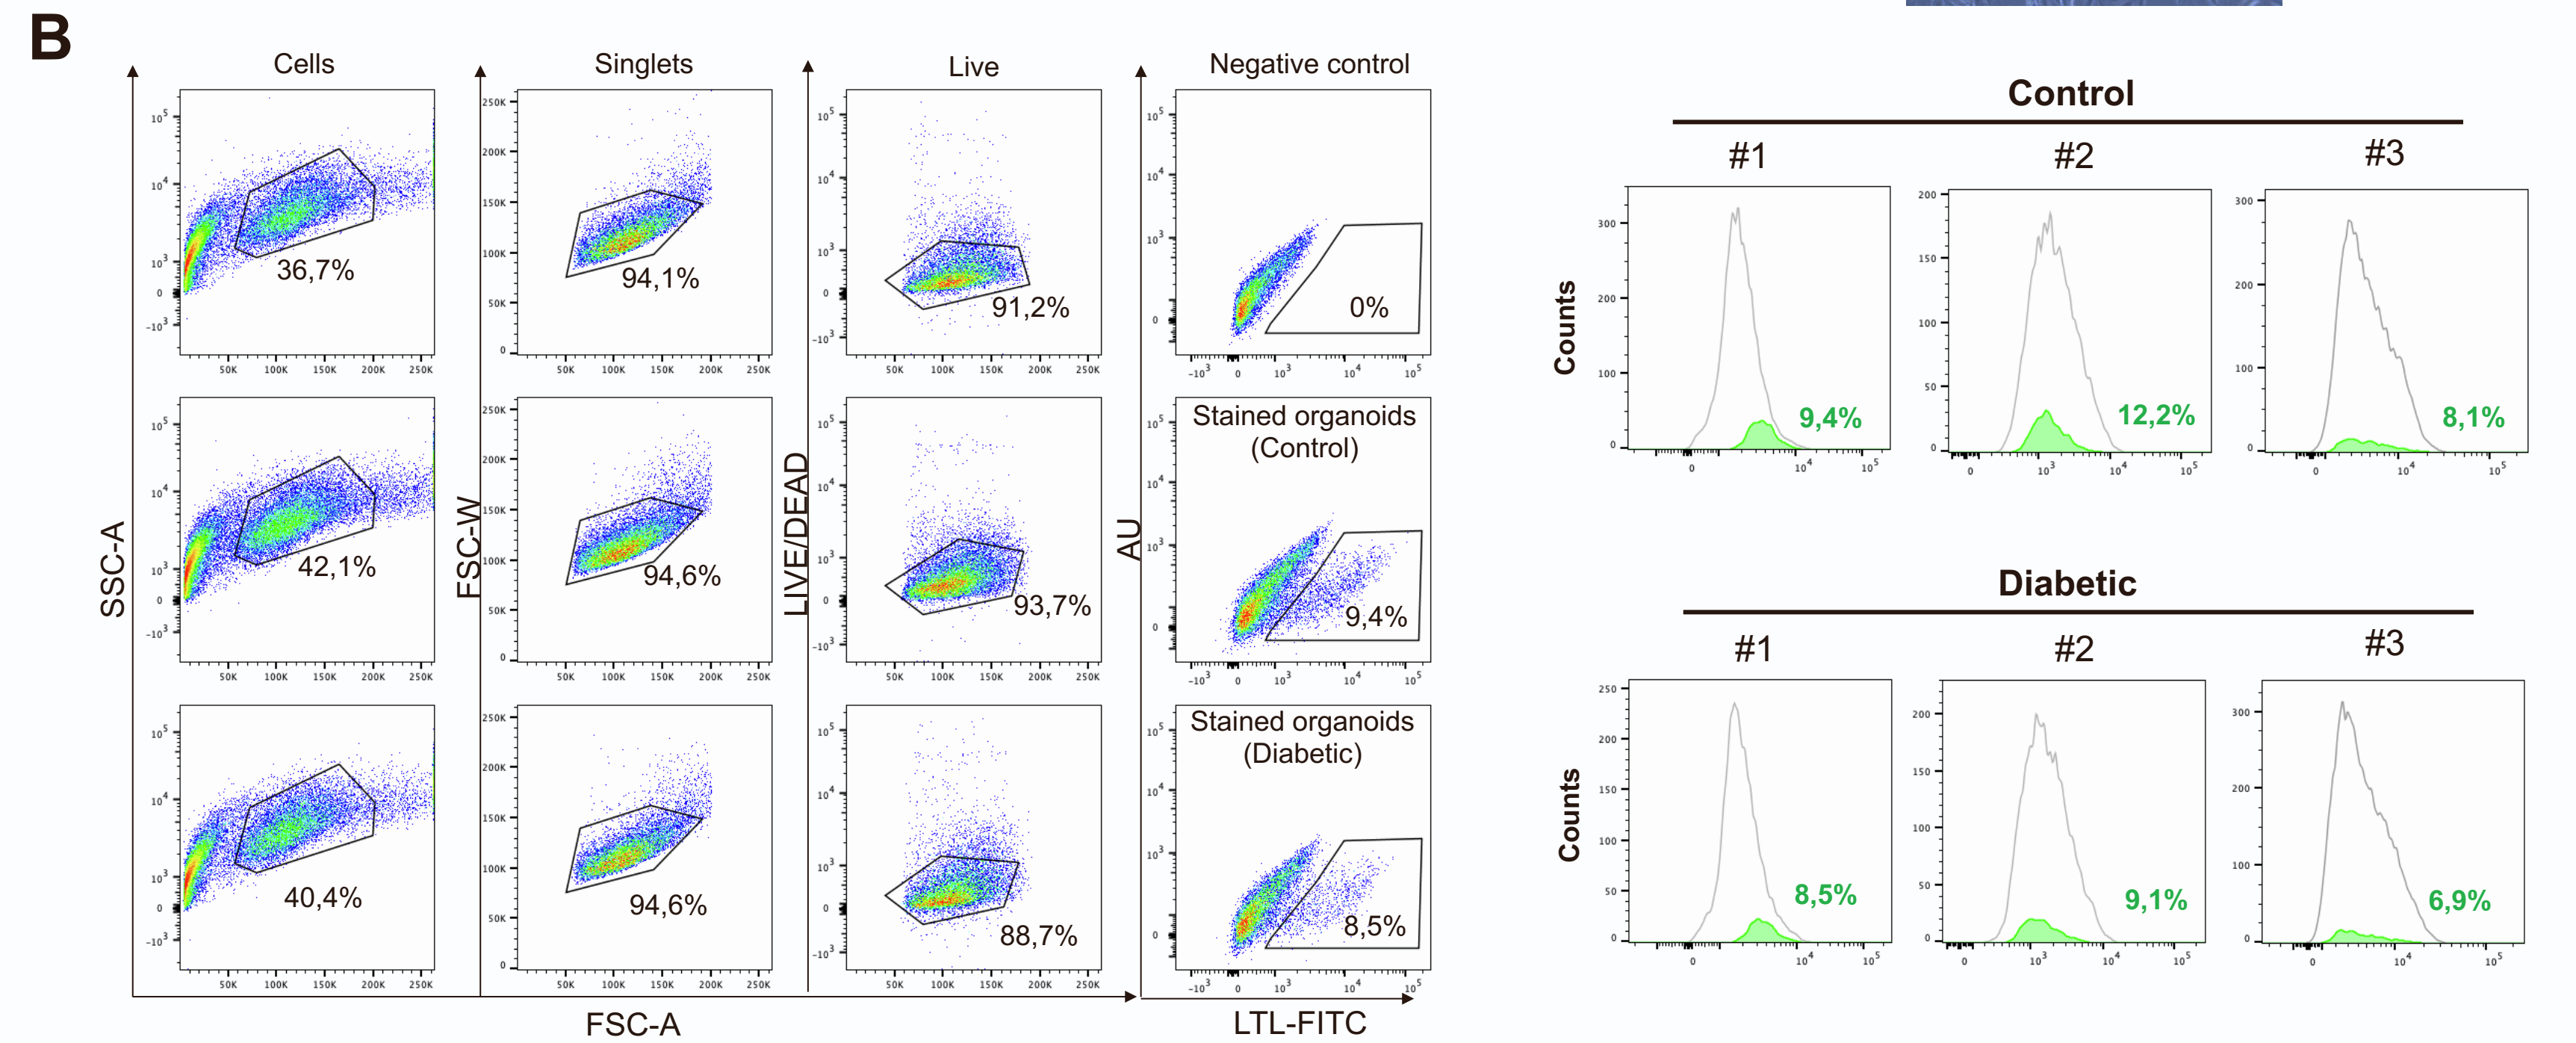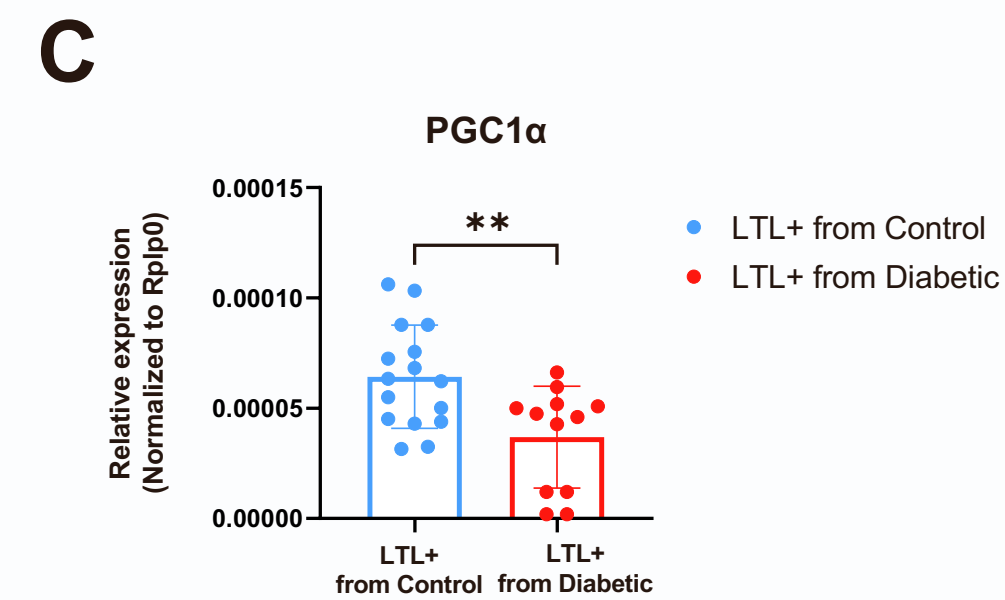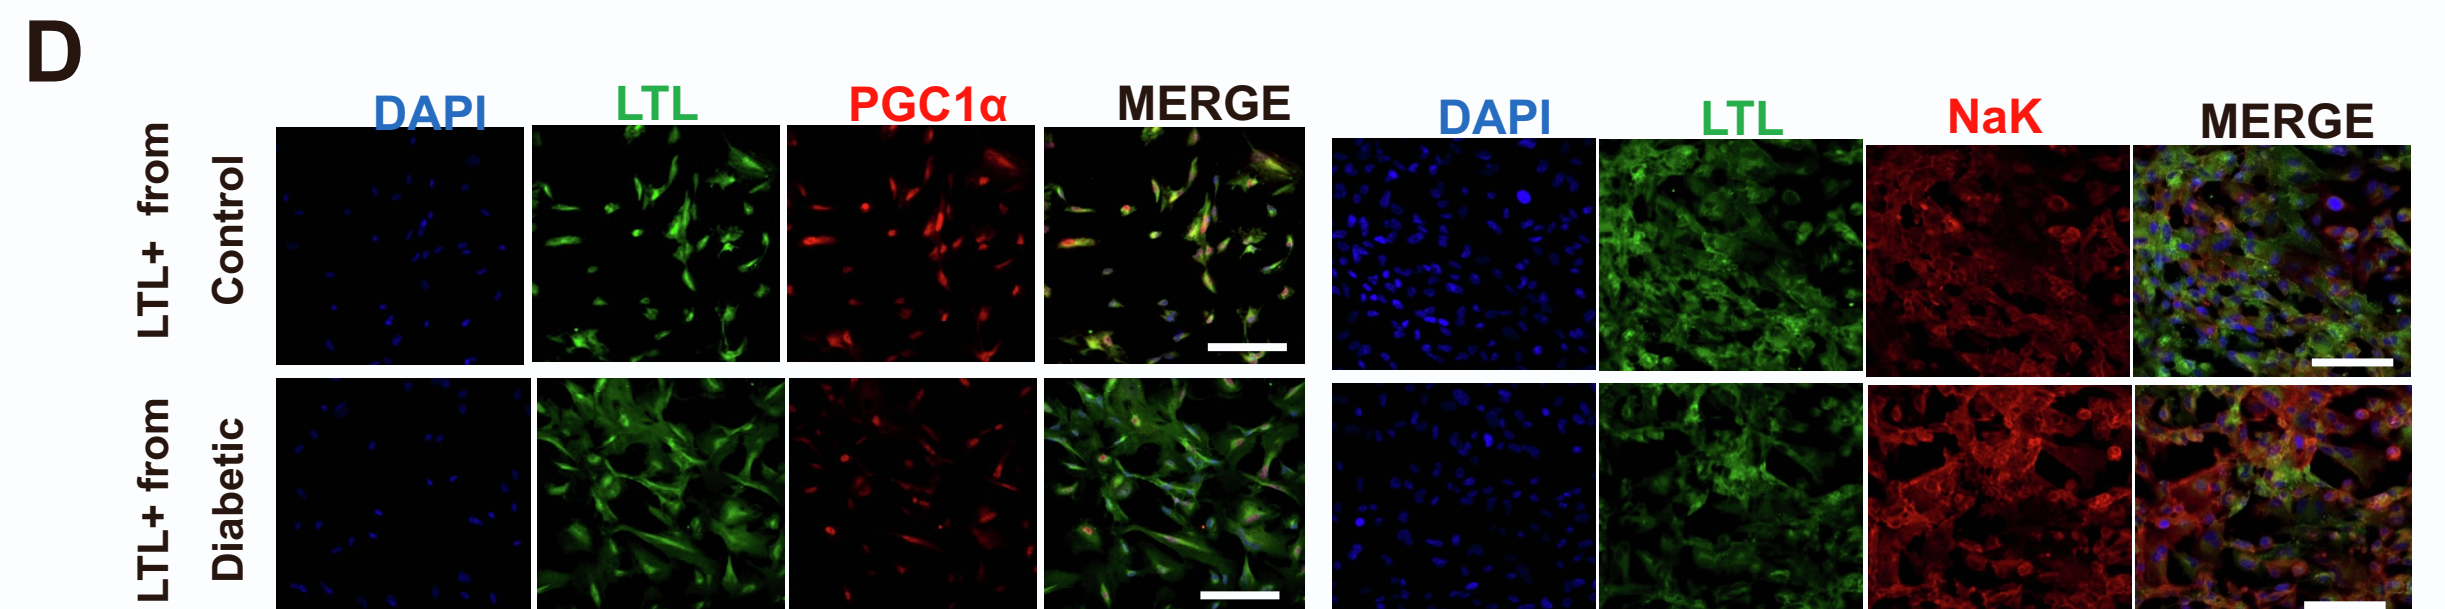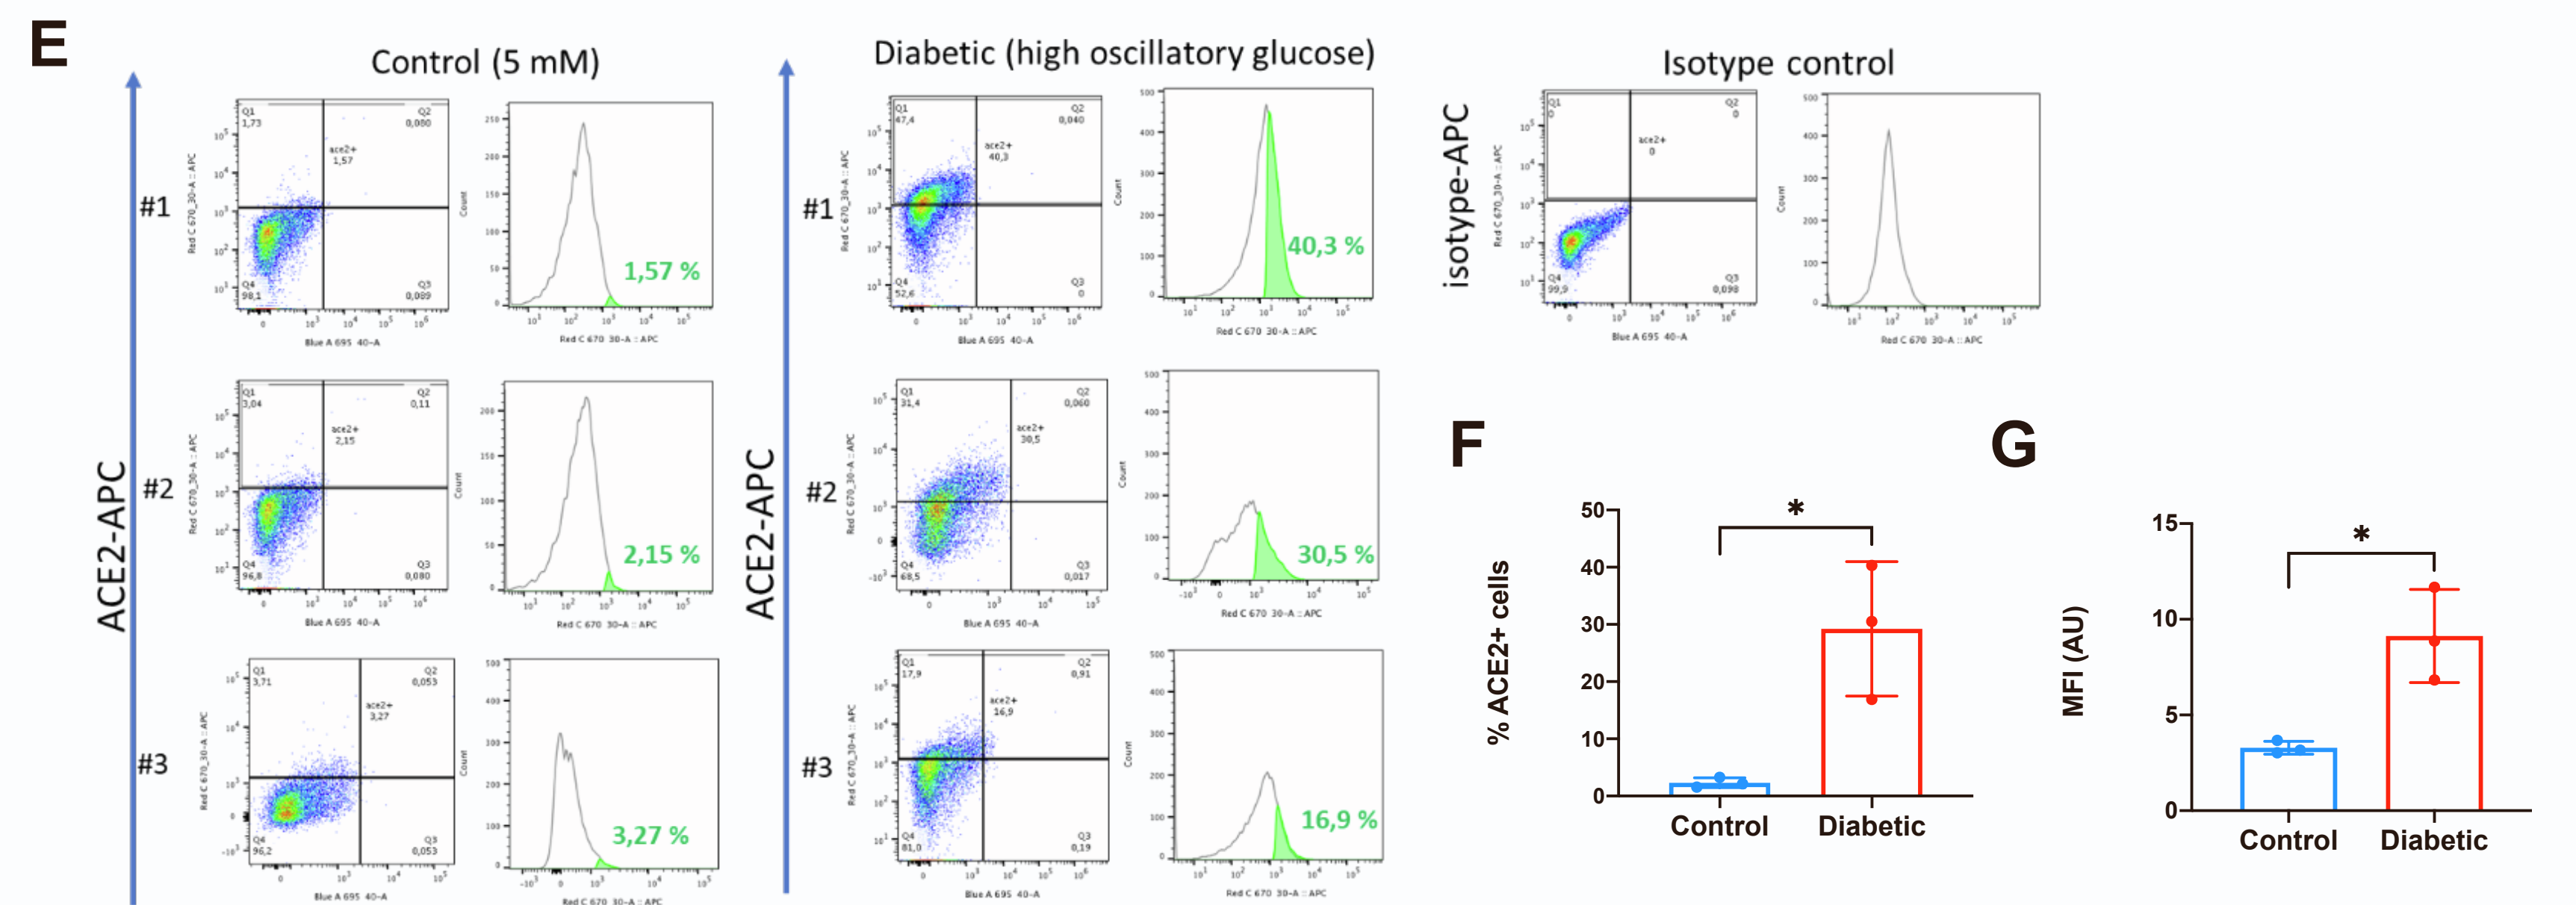

**Figure S2. Characterization of Tubular Epithelial Cells Derived from Diabetic Human Kidney Organoids Reveals Alterations in Cellular Metabolism, Related to Figure 1 and Figure 2.**

- A) Kidney organoids exposed to Control or Diabetic conditions were stained with LTL-FITC and dissociated to single cells. Proximal-like epithelial cells (LTL+ cells) were isolated by cell sorting for LTL marker expression and further cultured in 5 mM glucose culture medium. Right panels show representative bright field images. Scale bars, 100  $\mu\text{m}$ .
- B) Gating strategy for cell sorting of LTL+ cells from kidney organoids exposed to Control or Diabetic conditions. Numbers in outlined areas indicate percent cells. AU, autofluorescence. Histograms representing the overlay of live cells and LTL+ cells isolated from Control and Diabetic kidney organoids from 3 independent cell sorting experiments.
- C) mRNA expression levels of *PGC1 $\alpha$*  in LTL+ cells isolated from kidney organoids exposed to Control or Diabetic conditions. The data are presented as mean  $\pm$  s.d. of at least  $n = 6$  independent biological replicates per condition with two technical replicates each. **\*\* $P < 0.01$** , unpaired Student's *t*-test.
- D) Representative immunofluorescence staining in LTL+ cells isolated from Control or Diabetic kidney organoids and subsequently expanded in 5 mM glucose culture medium for the expression of proximal tubular cell markers including LTL (green), *PGC1 $\alpha$*  (red) and Na-K ATPase (NaK; red). Nuclei were counterstained with DAPI (blue). Scale bars, 100  $\mu\text{m}$ .
- E) ACE2 expression in kidney organoids cultured under control or diabetic-like conditions.
- F) Representative FACS plots of kidney organoid cells after exposure to control or diabetic-like conditions. Data from 3 independent experiments.
- G) Correspondent quantification of the percentage of ACE2+ cells in Control and Diabetic organoids in F). Data are mean  $\pm$  SD of  $n = 3$  independent experiments, unpaired Student's *t*-test.
- H) Mean fluorescence intensity of ACE2+ cells in Control or Diabetic conditions. Data are mean  $\pm$  SD of  $n = 3$  independent experiments, unpaired Student's *t*-test.

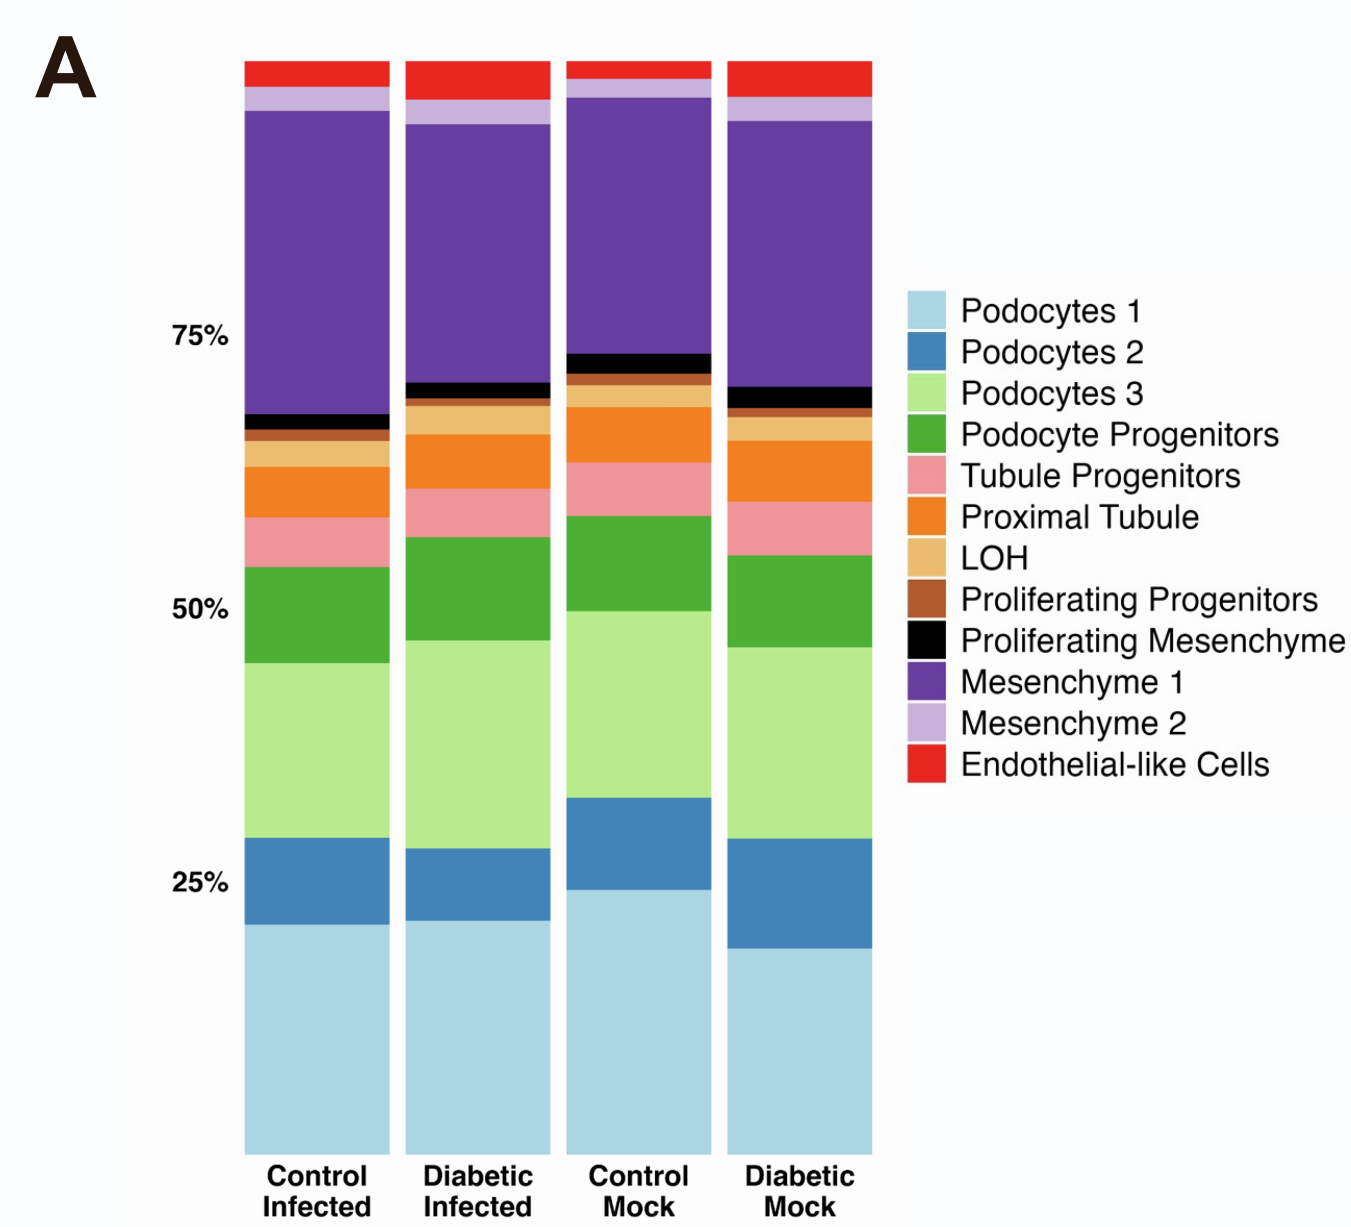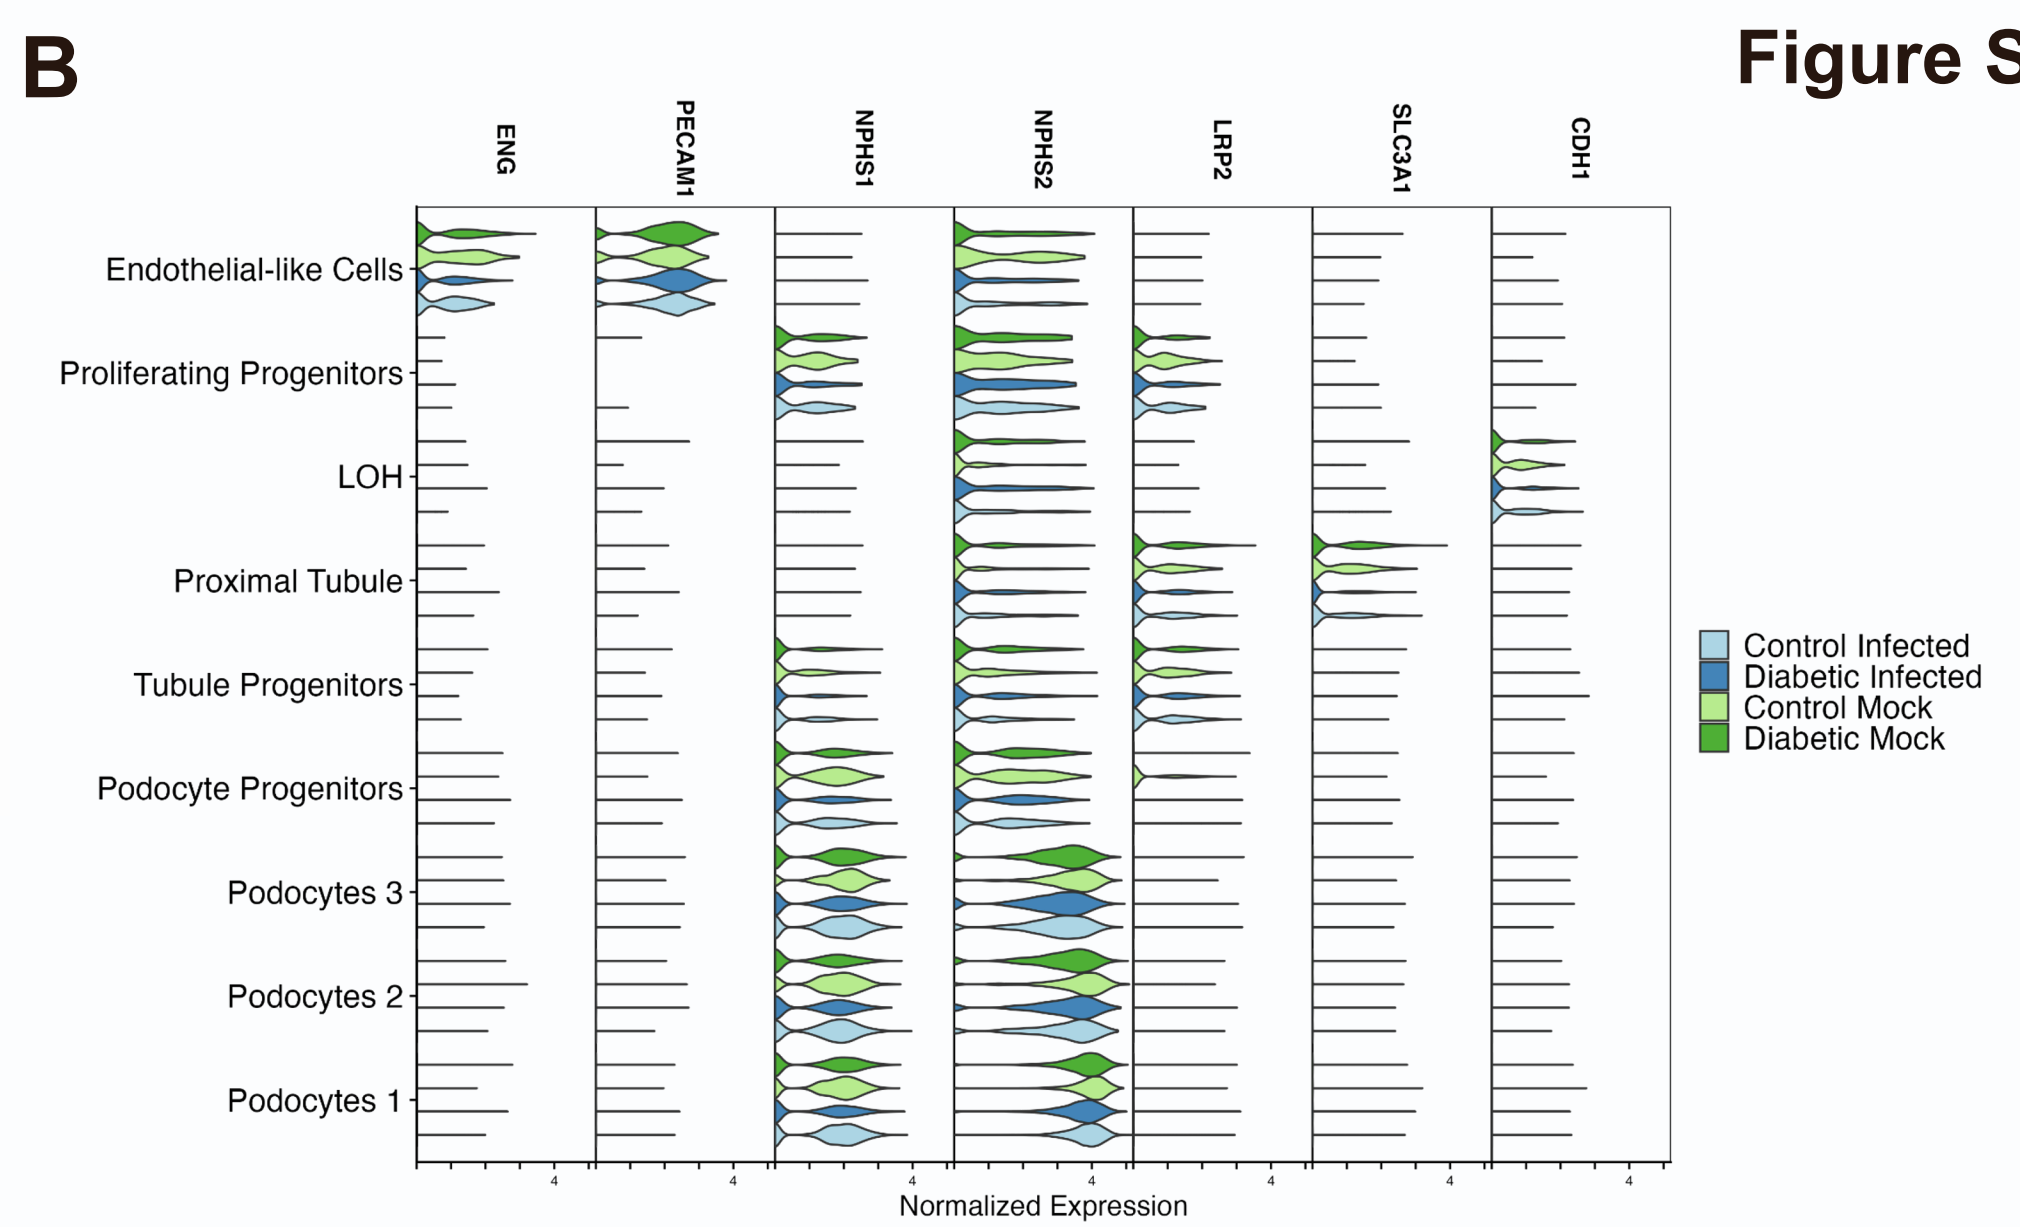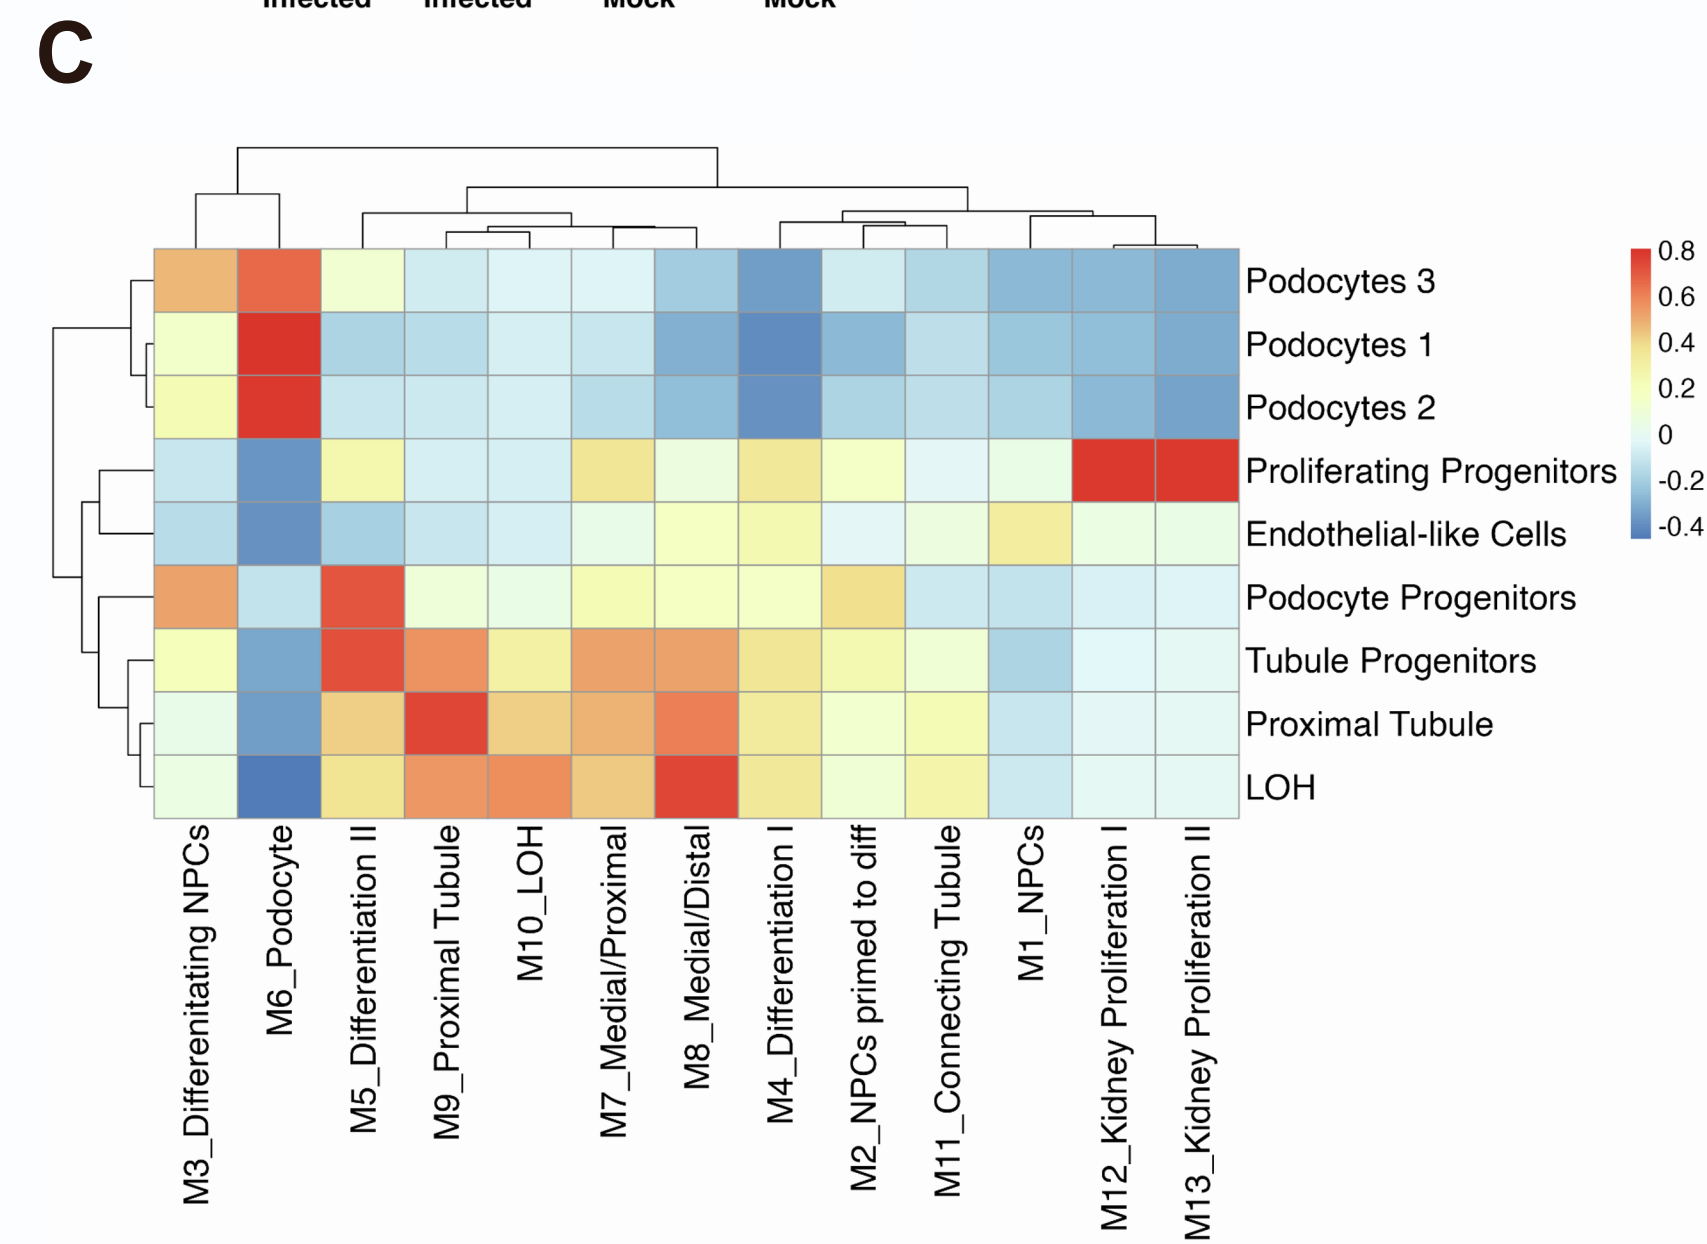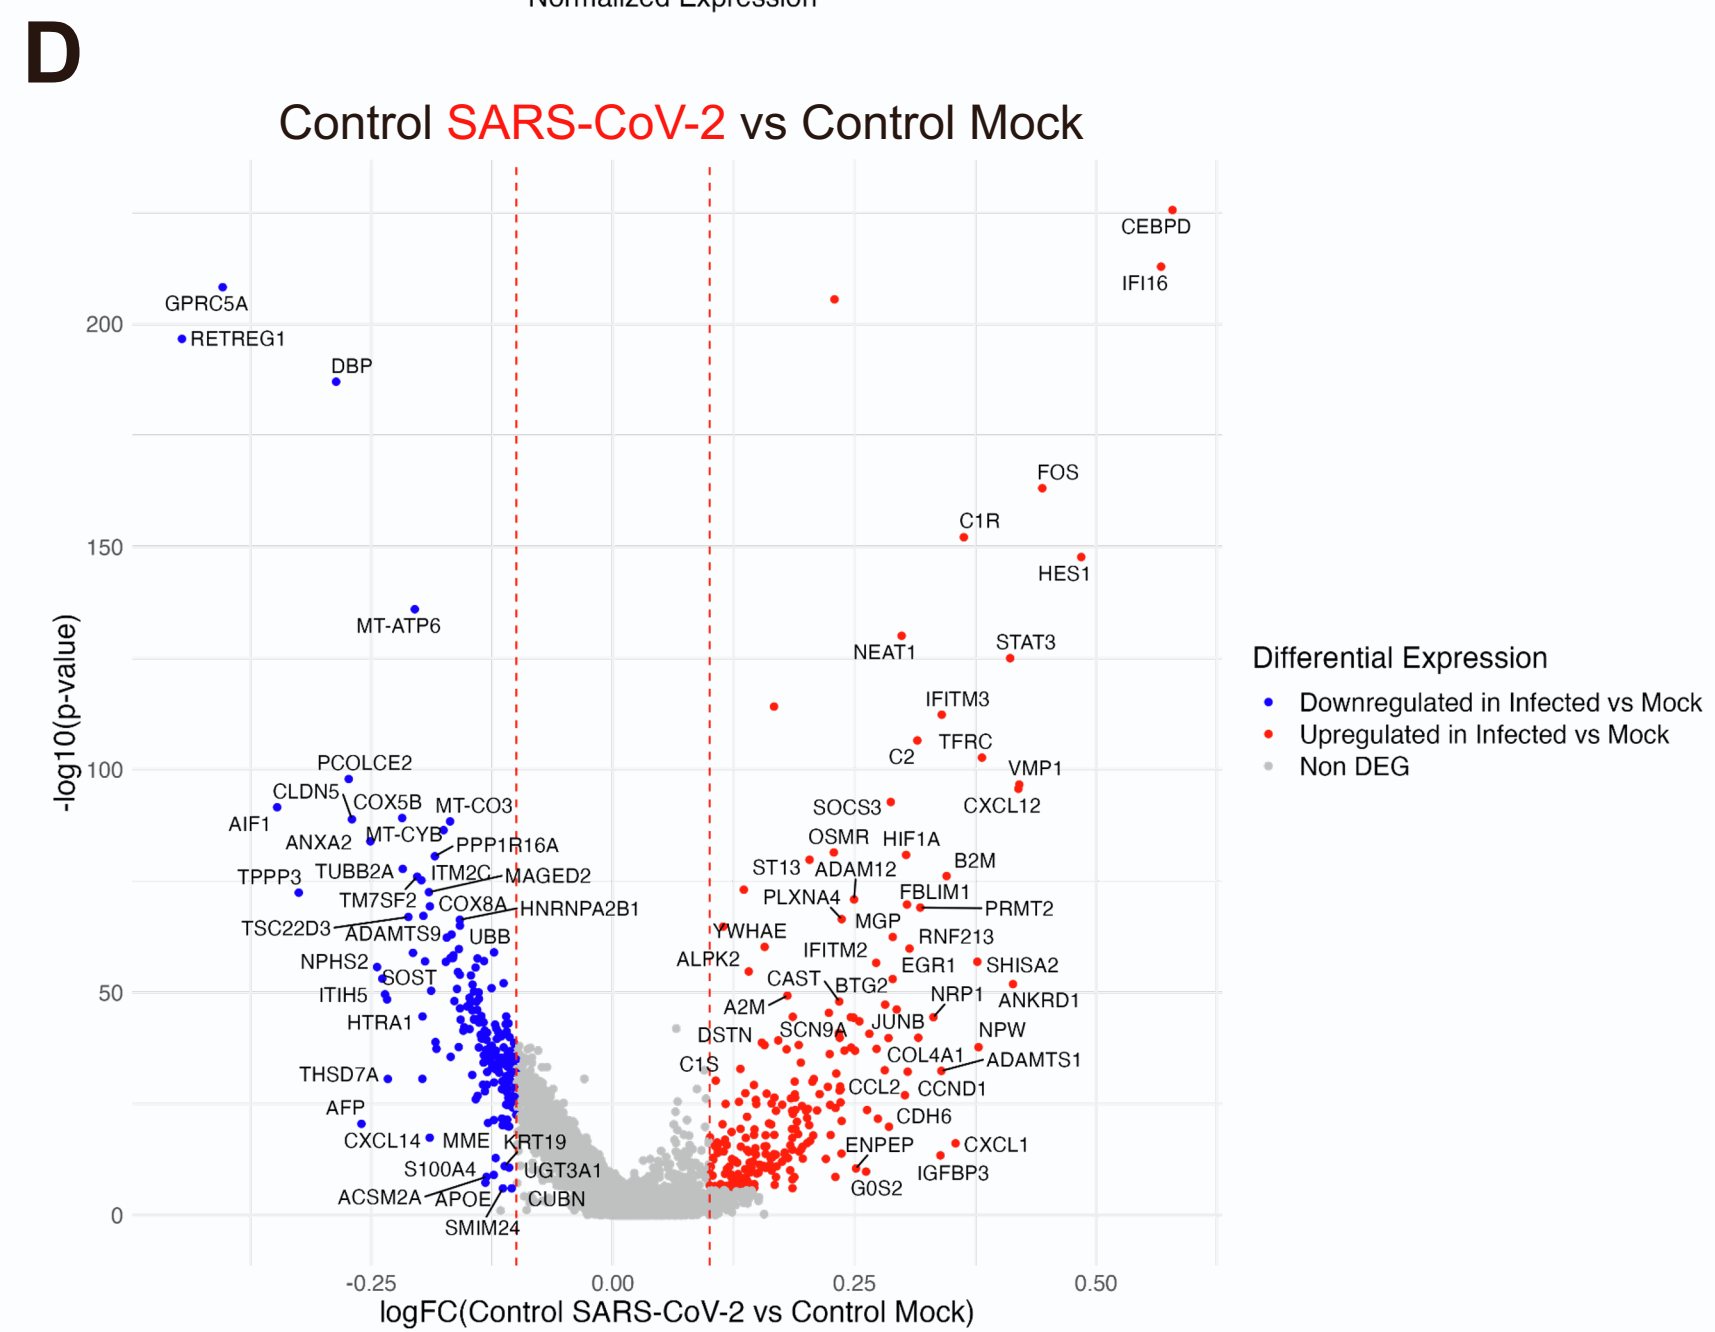

**E** Enrichment for DEG in Control SARS-CoV-2 vs Control Mock

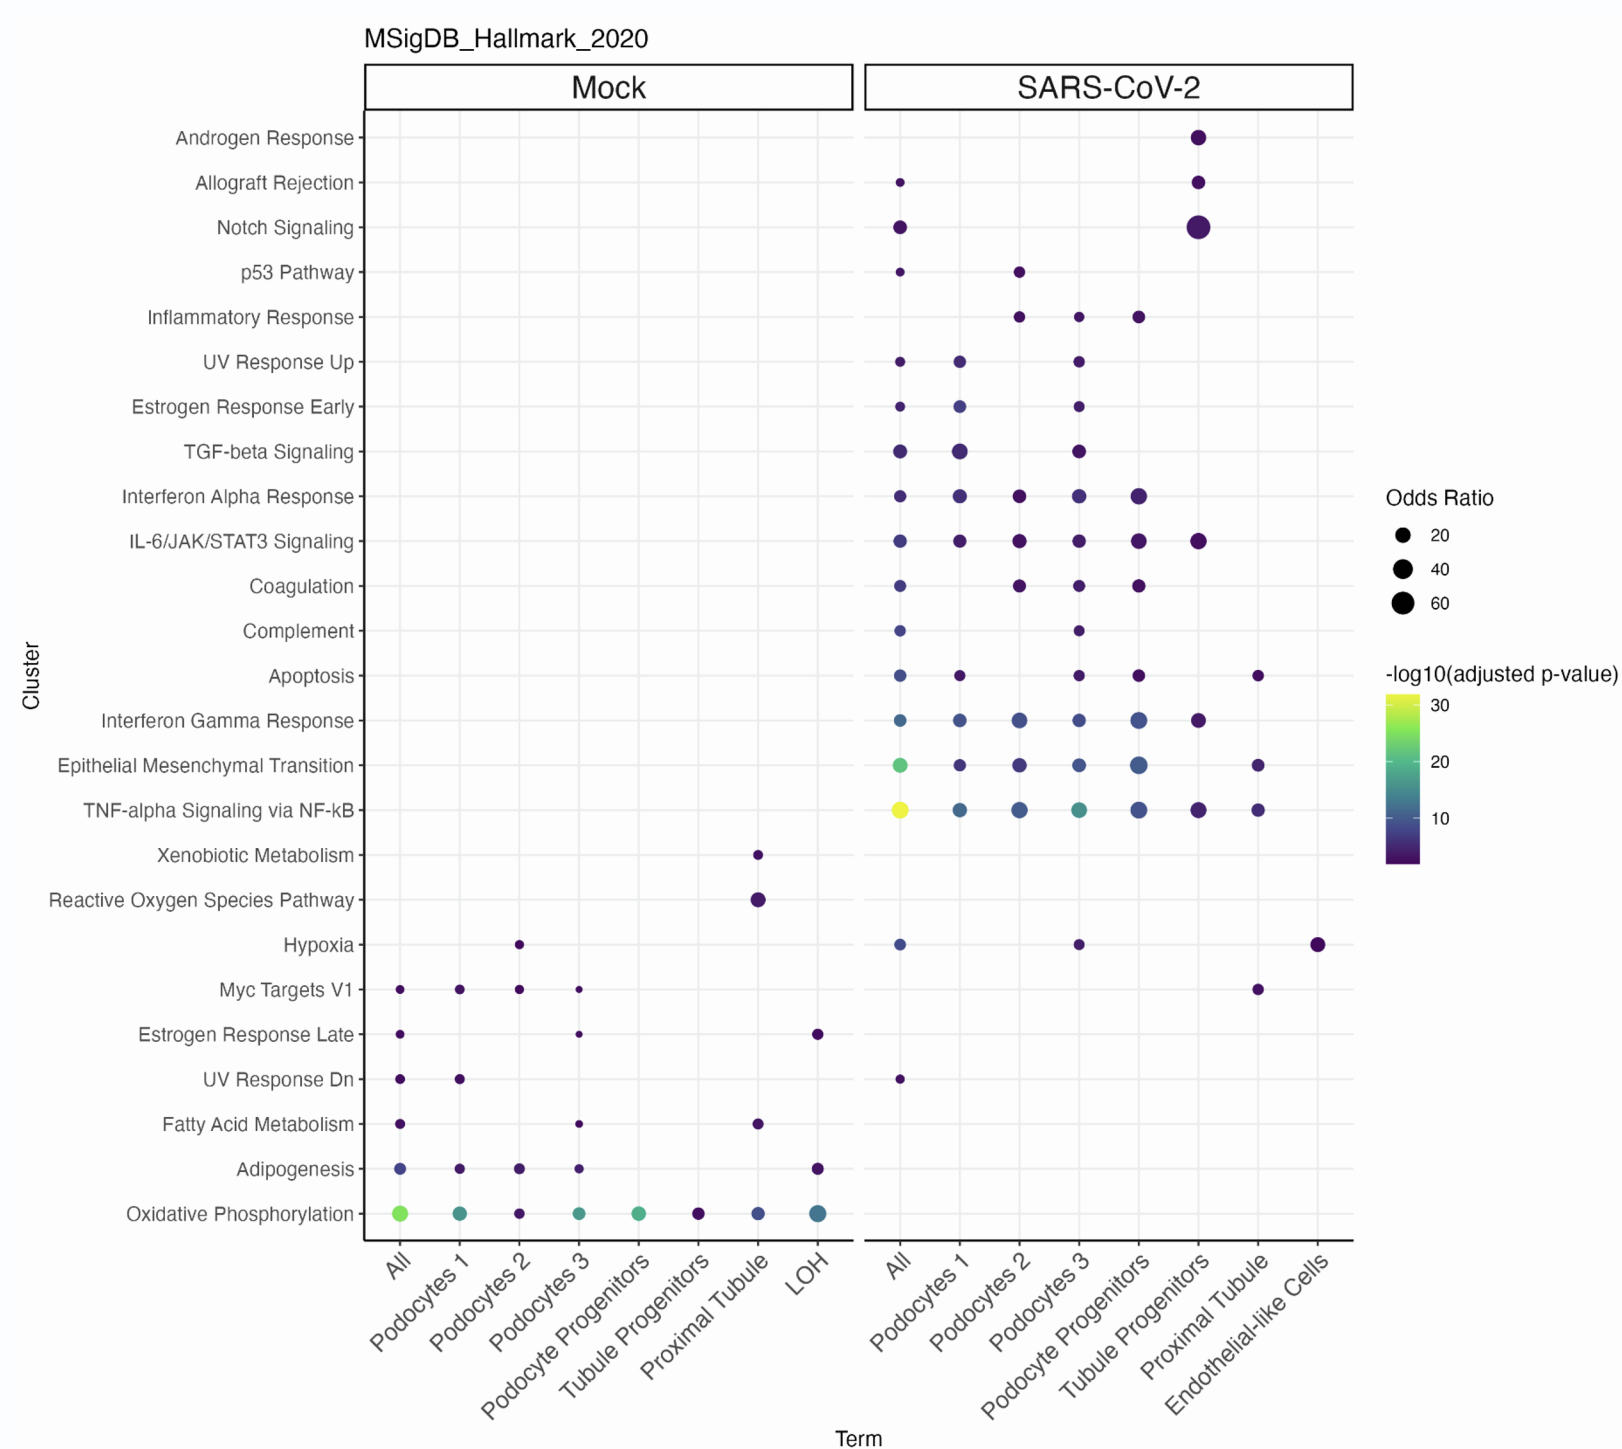

**F** Enrichment for DEG in Diabetic SARS-CoV-2 vs Diabetic Mock

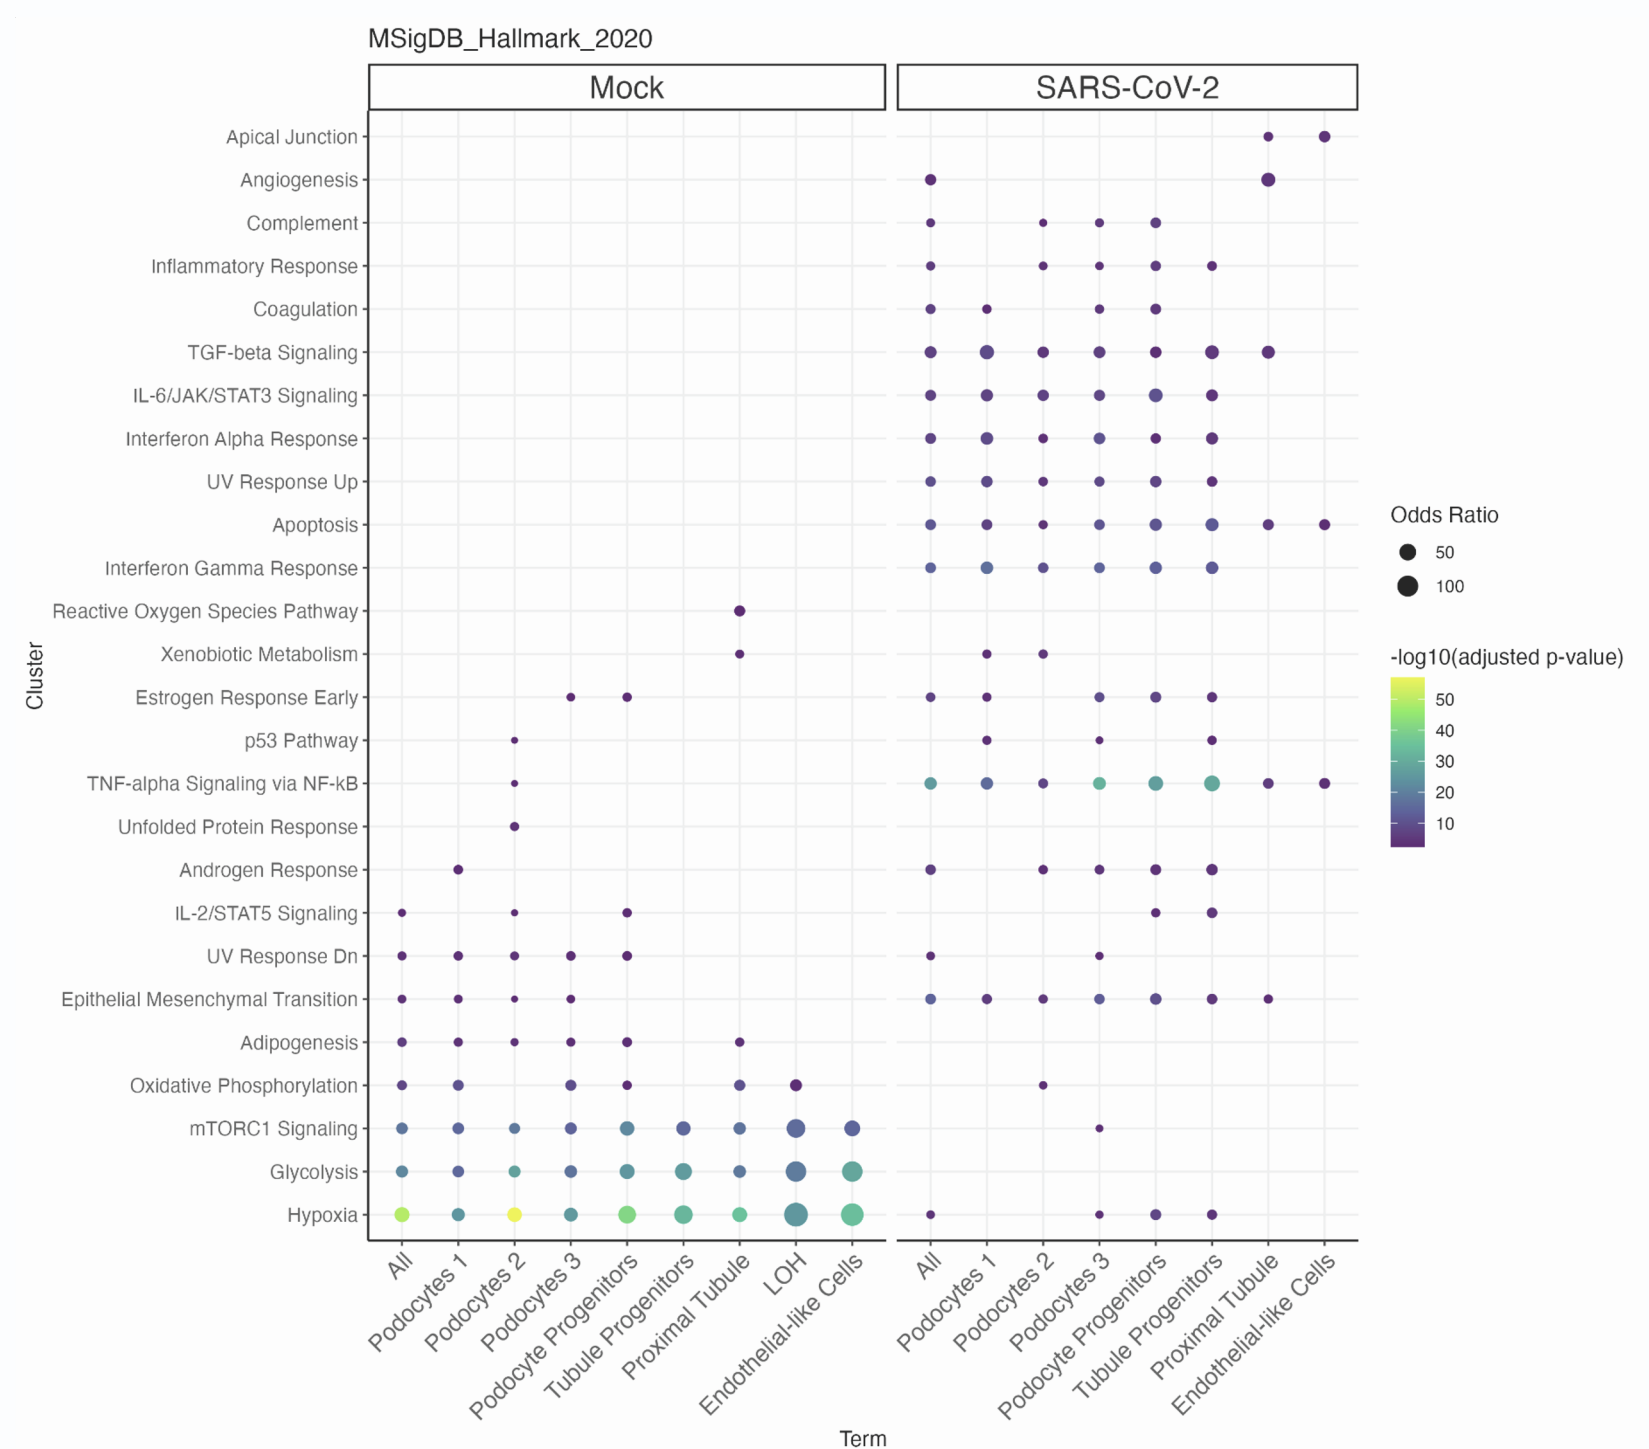

**Figure S3. Phenotypic and Transcriptional Changes in Diabetic Human Kidney Organoids after SARS-CoV-2 Infection, Related to Figure 3.**

- A) Cell type proportions in Mock or SARS-CoV-2 infected ( $10^6$  virus particles/organoid as determined in Vero cells) kidney organoids exposed to Control or Diabetic conditions after discarding non-renal cells and Proliferating Progenitors 2 clusters.
- B) Violin plots for the indicated markers in Mock or SARS-CoV-2 infected ( $10^6$  virus particles/organoid as determined in Vero cells) kidney organoids exposed to Control or Diabetic conditions.
- C) Correlation analysis between scores for gene modules from second semester fetal-kidney cell types [1] and scores for gene signatures from the annotated renal-like cell types in Mock and SARS-CoV-2 infected kidney organoids. Scores were obtained with the *AddModuleScore* function from Seurat. Color scale denotes Pearson correlation coefficients.
- D) Differentially expressed genes (DEGs) in the comparison of SARS-CoV-2 infected ( $10^6$  virus particles/organoid as determined in Vero cells) against Mock kidney organoids in Control conditions considering only renal-like cell types (Podocytes 1/2/3, PT, LOH, Tubule Progenitors, Podocyte Progenitors, Proliferating Progenitors and Endothelial-like Cells). In the volcano plot, the x-axis indicates log fold change (FC) and the y-axis indicates statistical significance with the  $-\log_{10}(\text{p-value})$ . Genes with an adjusted p-value  $< 0.05$  are considered upregulated (red) if the  $\log_{2}(\text{FC}) > 0.1$  and downregulated (blue) if the  $\log_{2}(\text{FC}) < -0.1$ . Non DEG are shown in grey.
- E) Gene over-representation analysis using the Hallmark database considering DEGs (adjusted p-value  $< 0.05$  and  $\log_{2}(\text{FC}) > 0.1$ ) to compare Mock and SARS-CoV-2 infected ( $10^6$  virus particles/organoid as determined in Vero cells) kidney organoids cultured in Control conditions. Each column corresponds to the analysis of DEG upregulated in each condition. Only the ten gene sets with lowest adjusted p-value in each comparison are shown. Circles are coded by color (p-value) and size (Odds ratio).
- F) Gene over-representation analysis using the Hallmark database considering DEGs (adjusted p-value  $< 0.05$  and  $\log_{2}(\text{FC}) > 0.1$ ) to compare Mock and SARS-CoV-2 infected ( $10^6$  virus particles/organoid as determined in Vero cells) kidney organoids cultured in Diabetic conditions. Each column corresponds to the analysis of DEG upregulated in each condition. Only the ten gene sets with lowest adjusted p-value in each comparison are shown. Circles are coded by color (p-value) and size (Odds ratio).

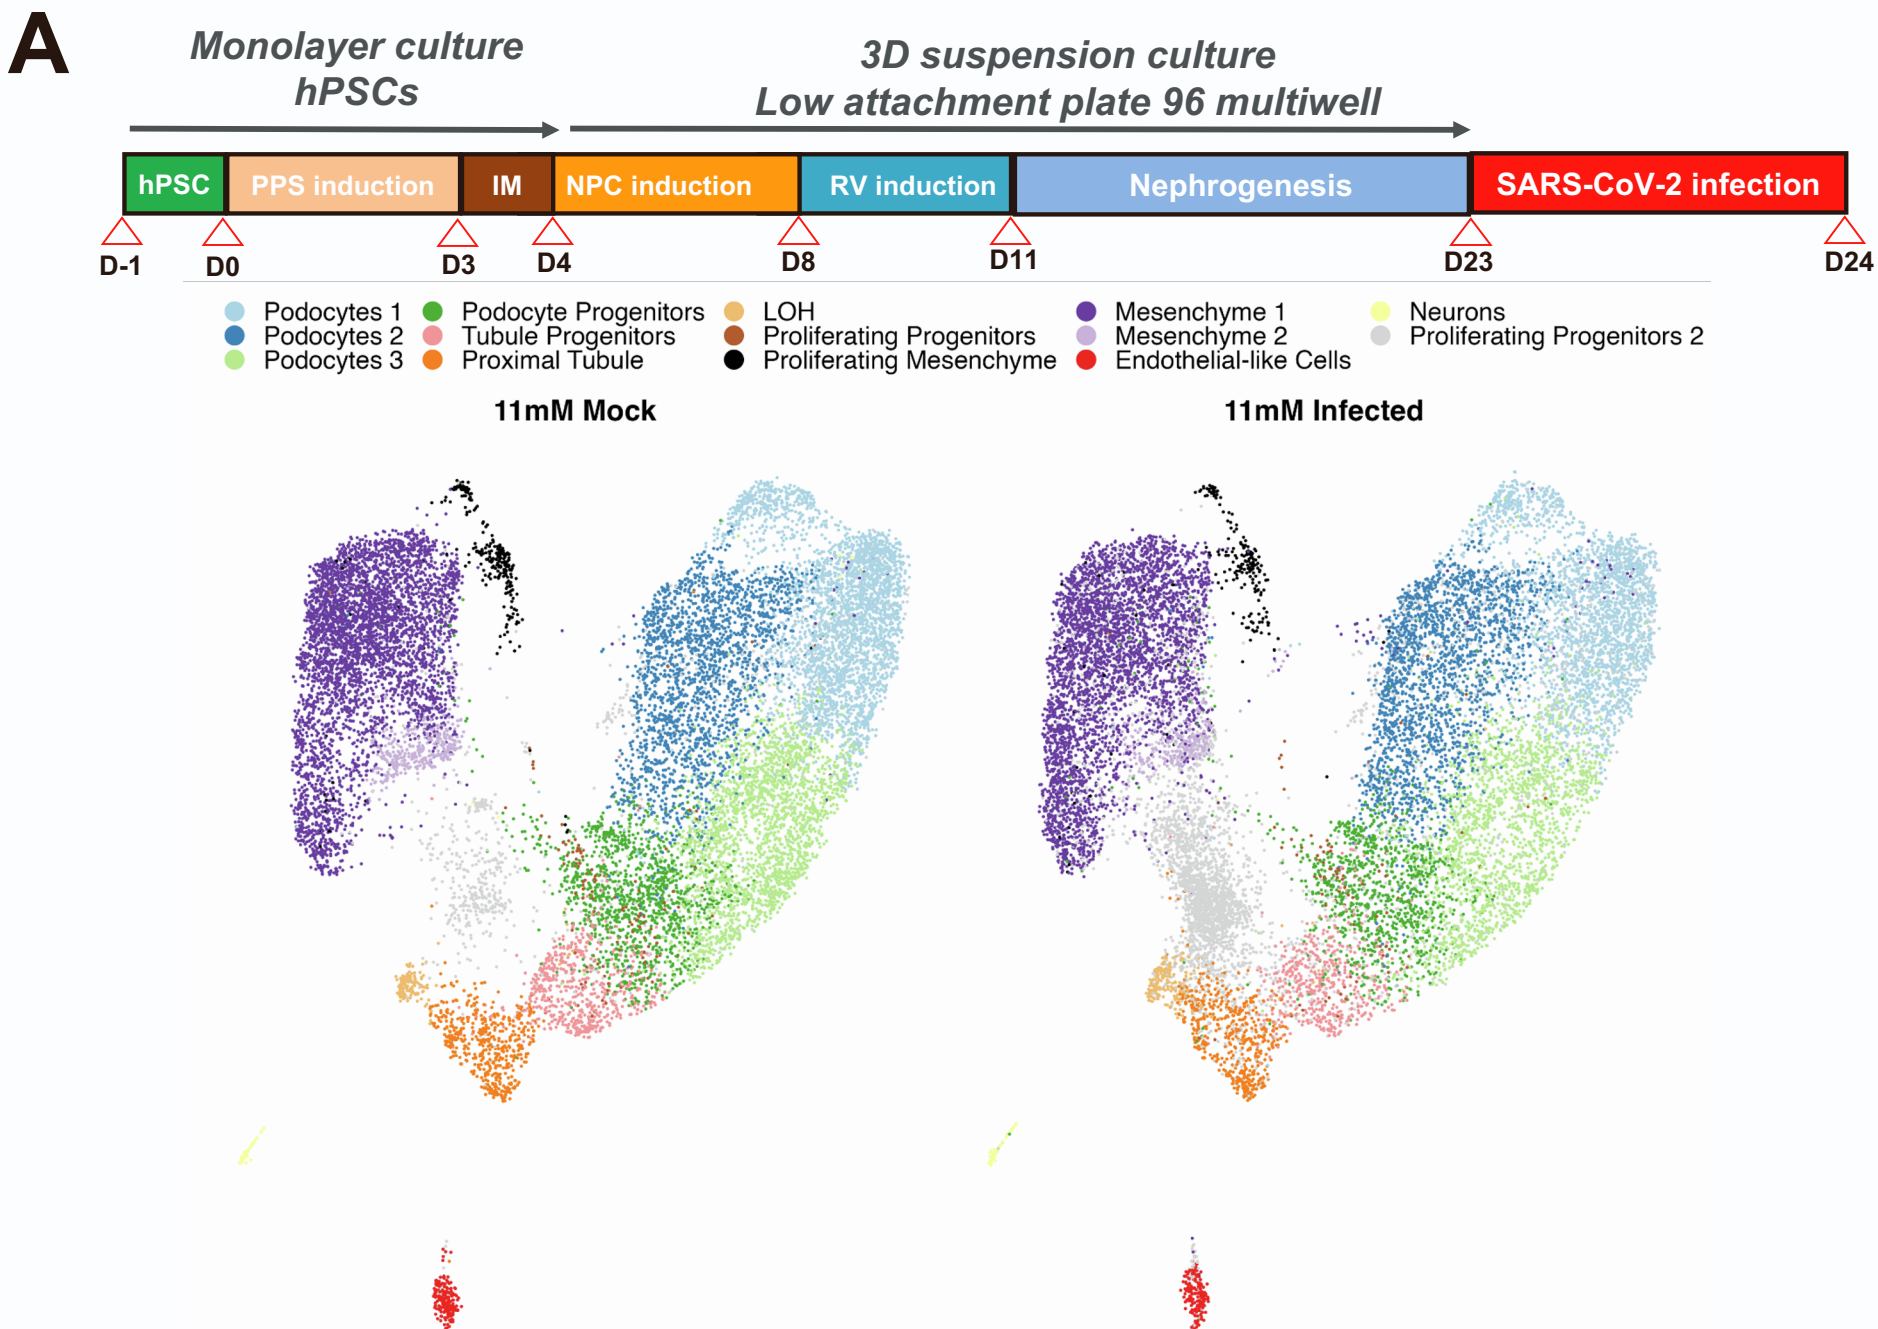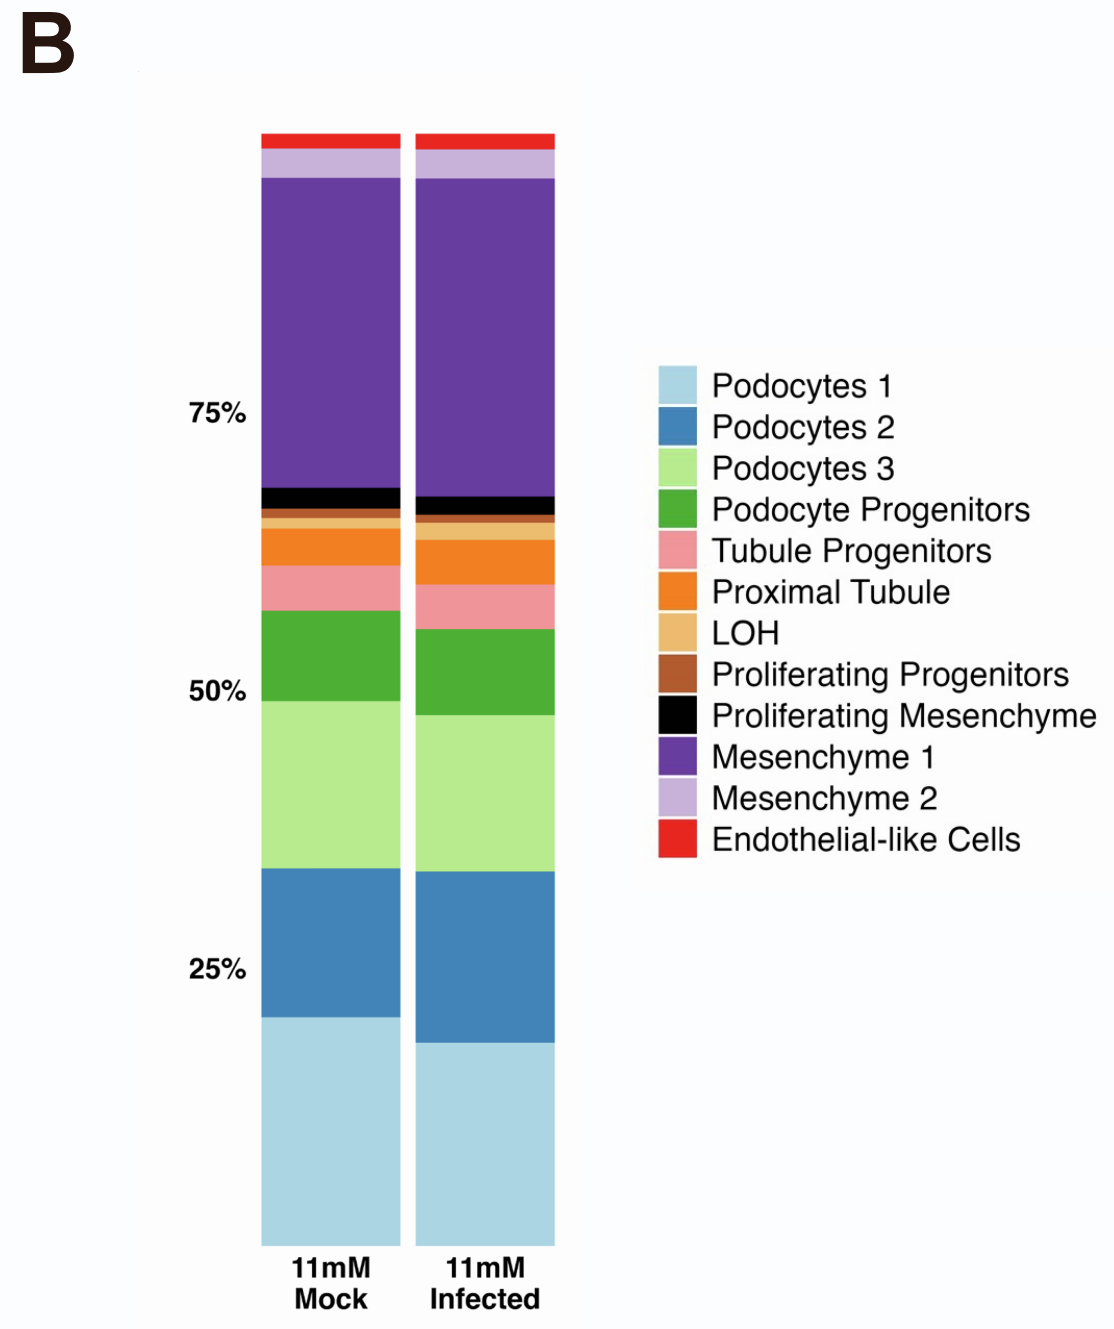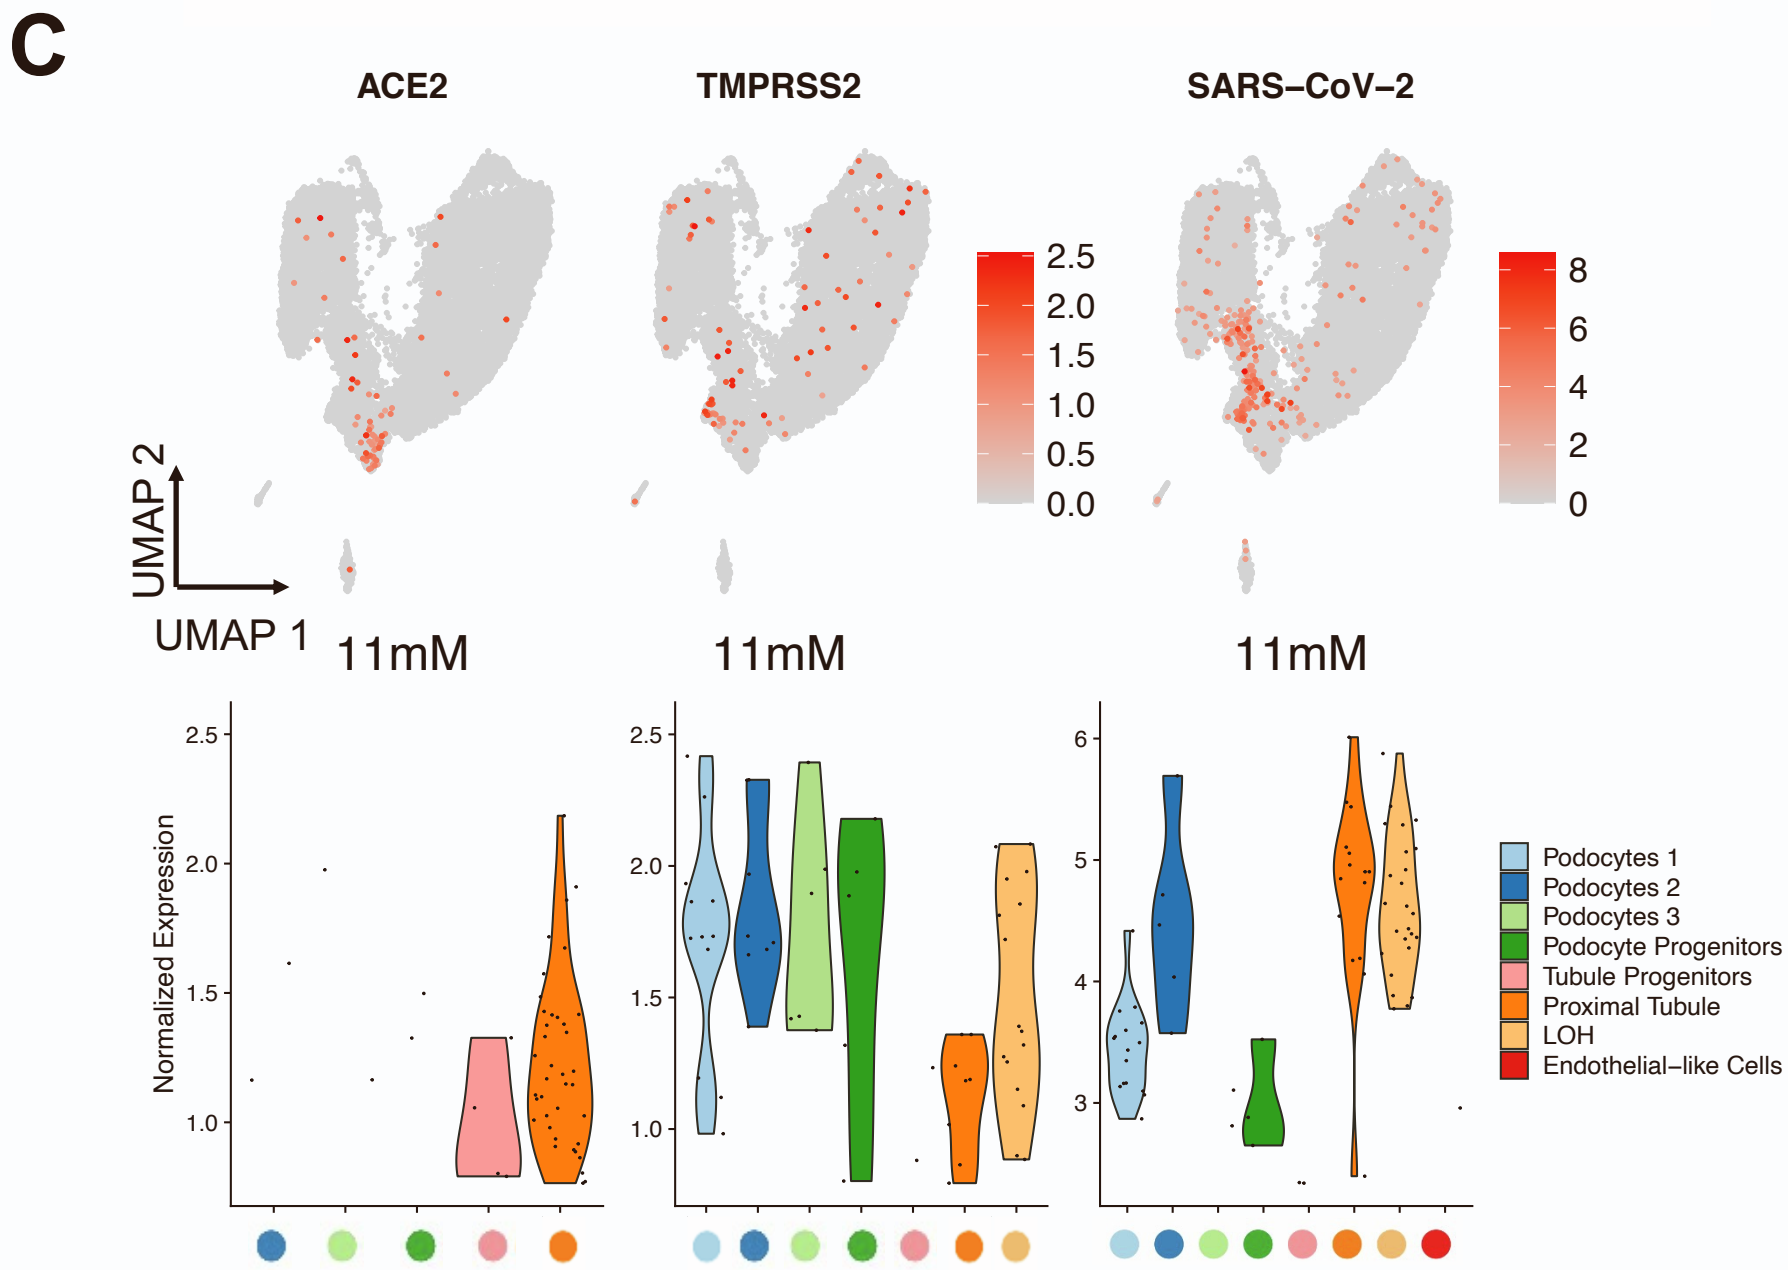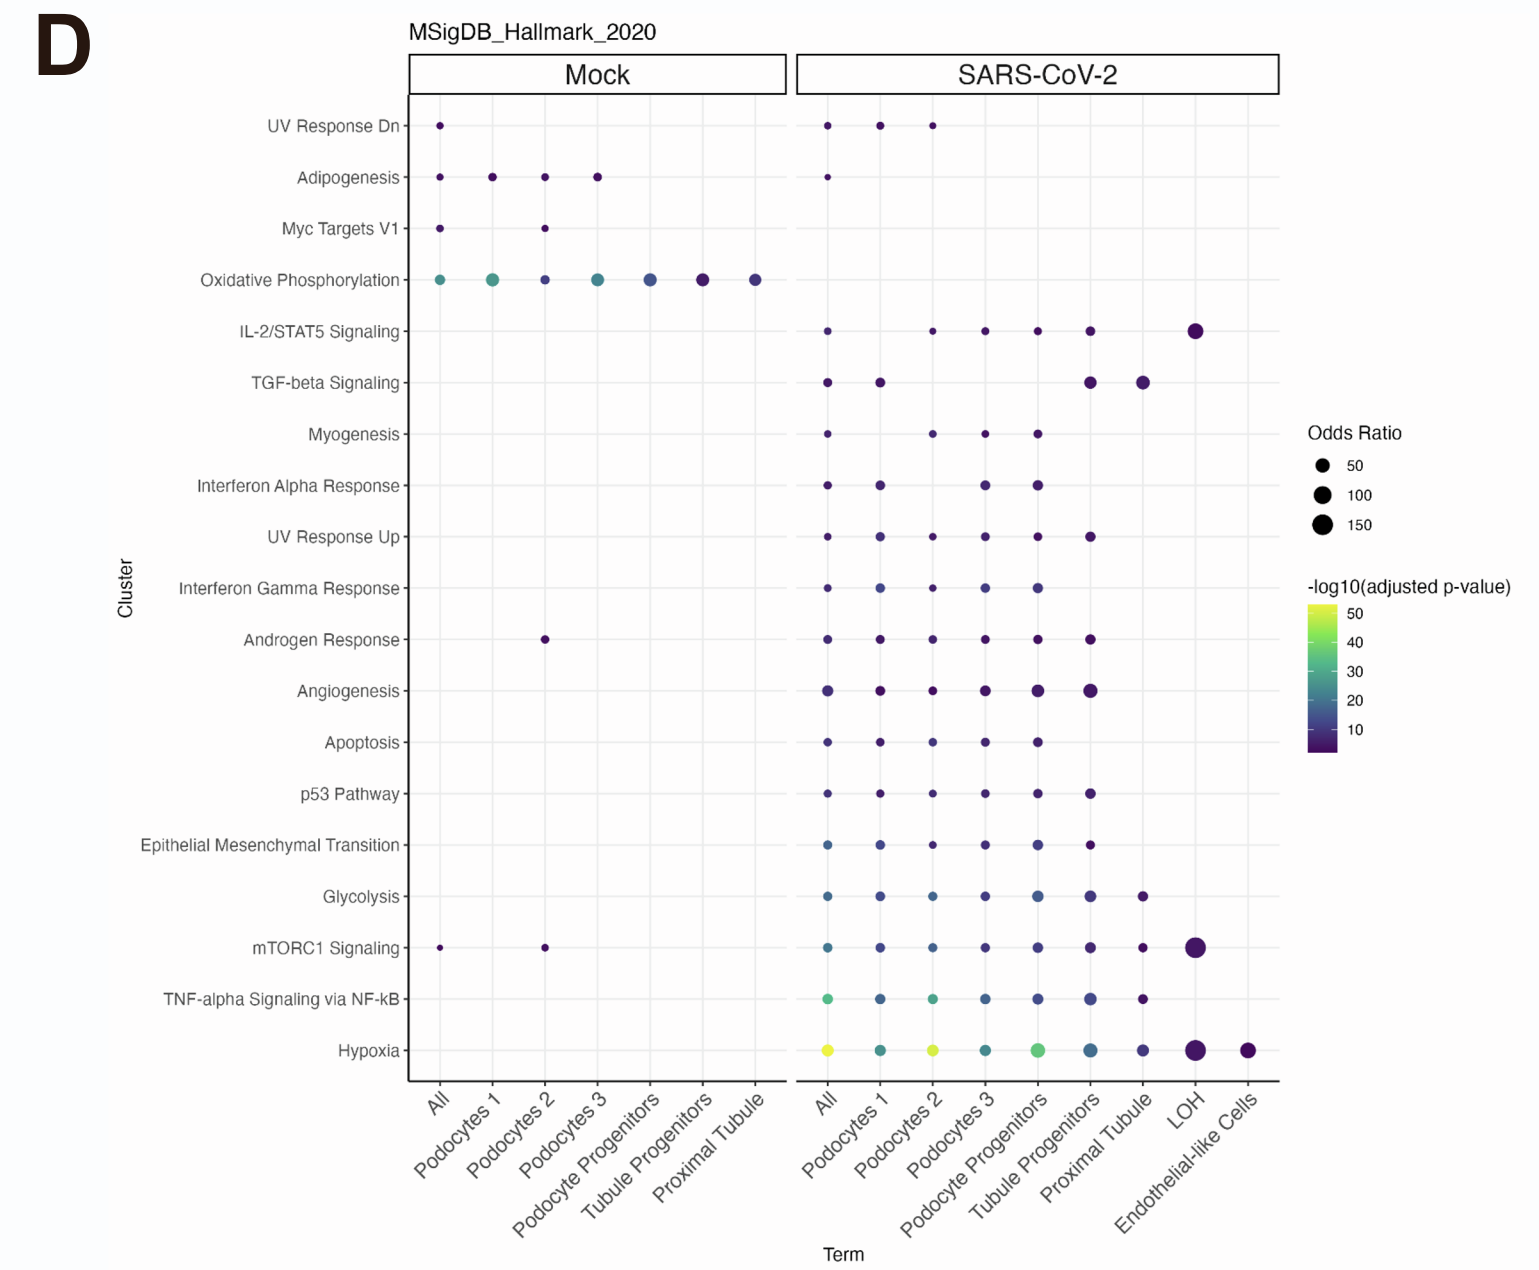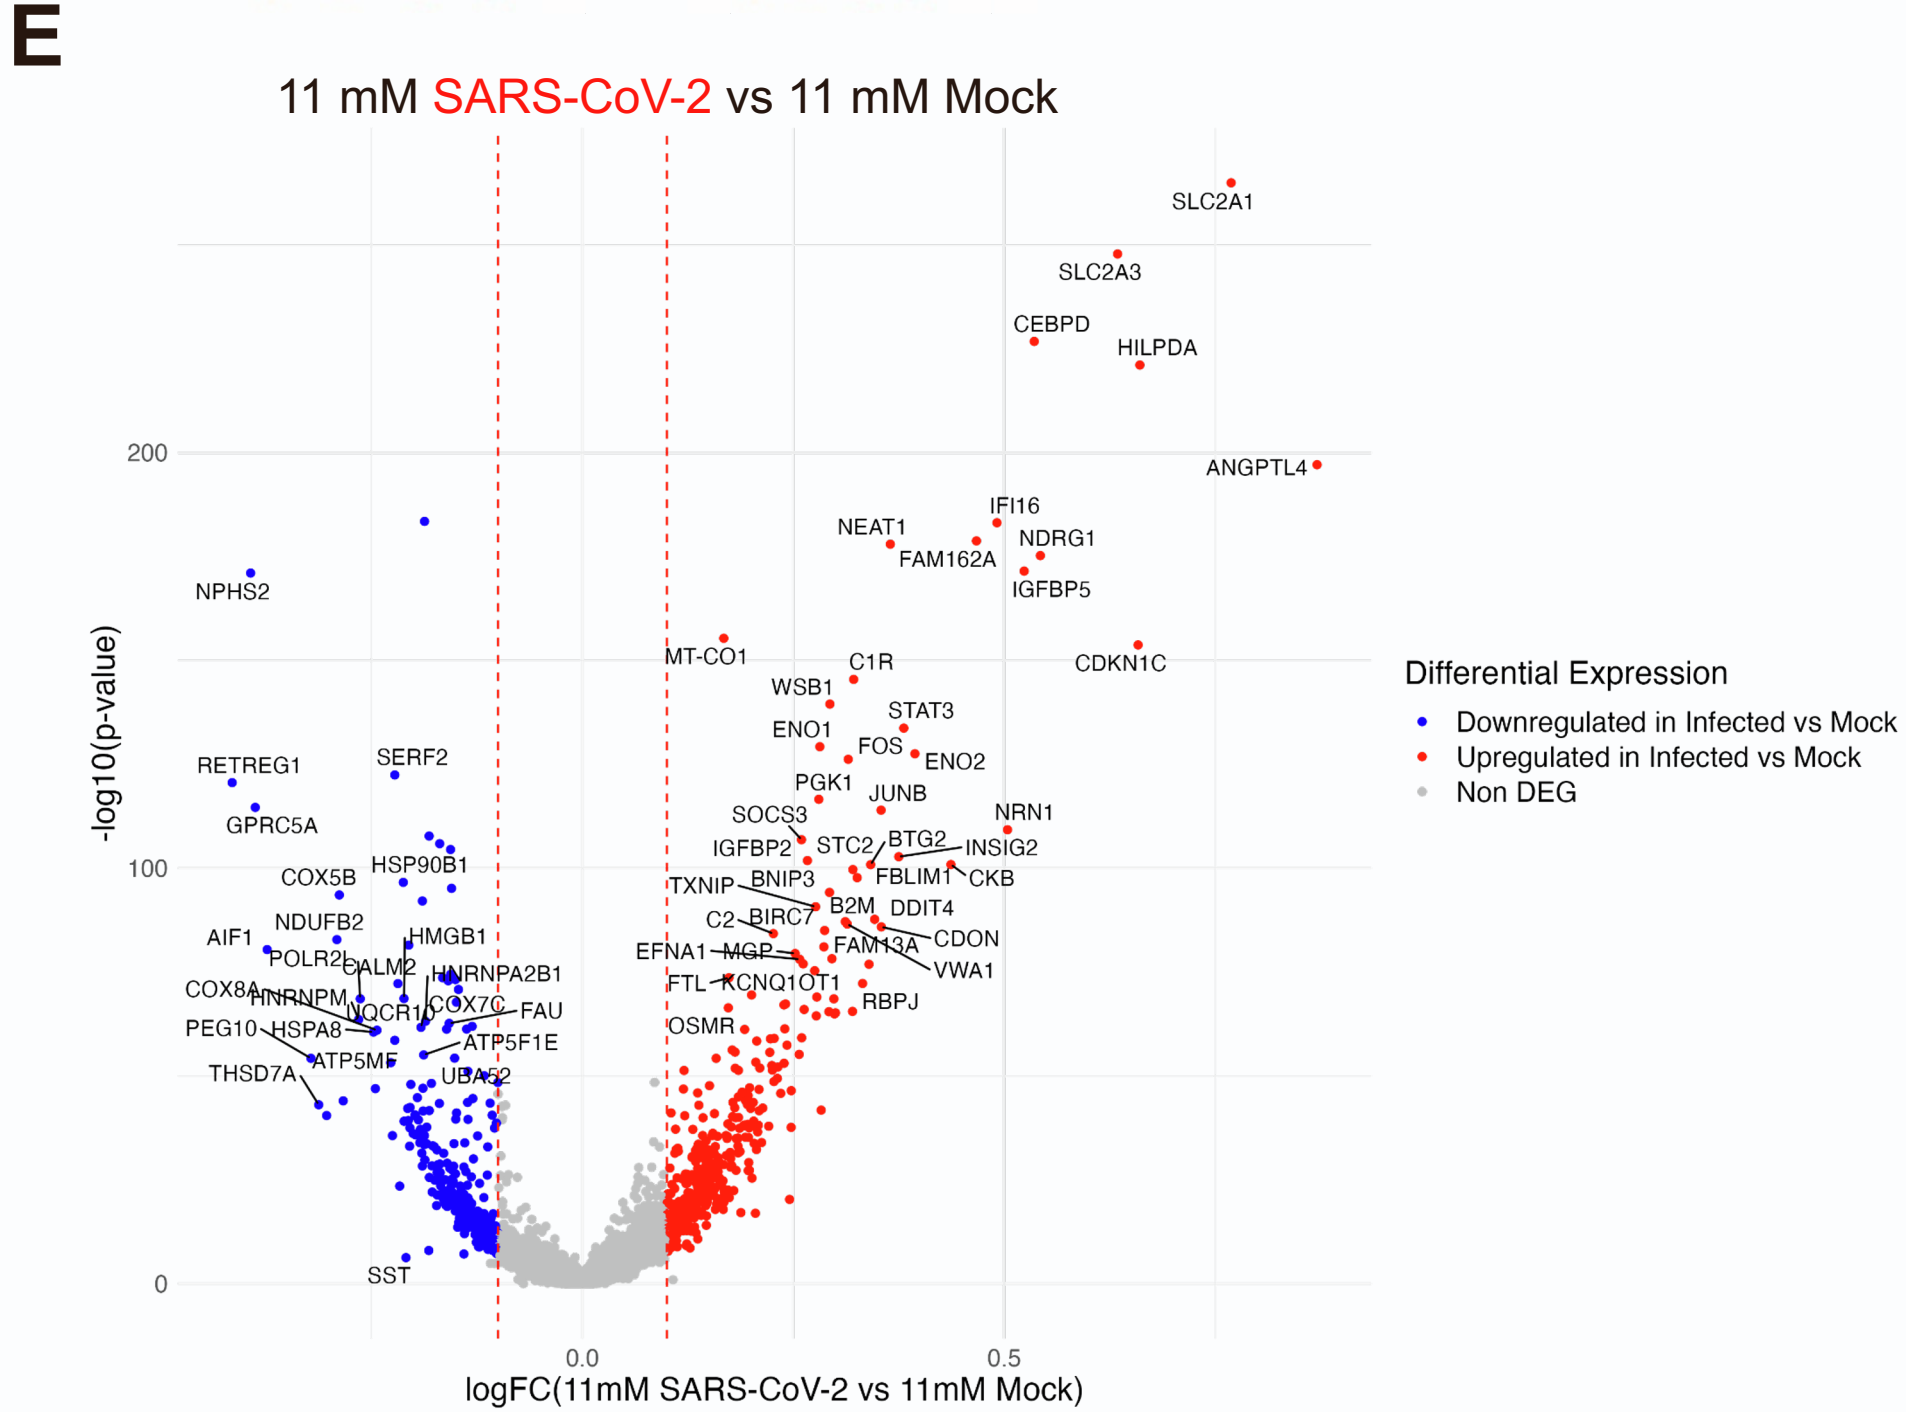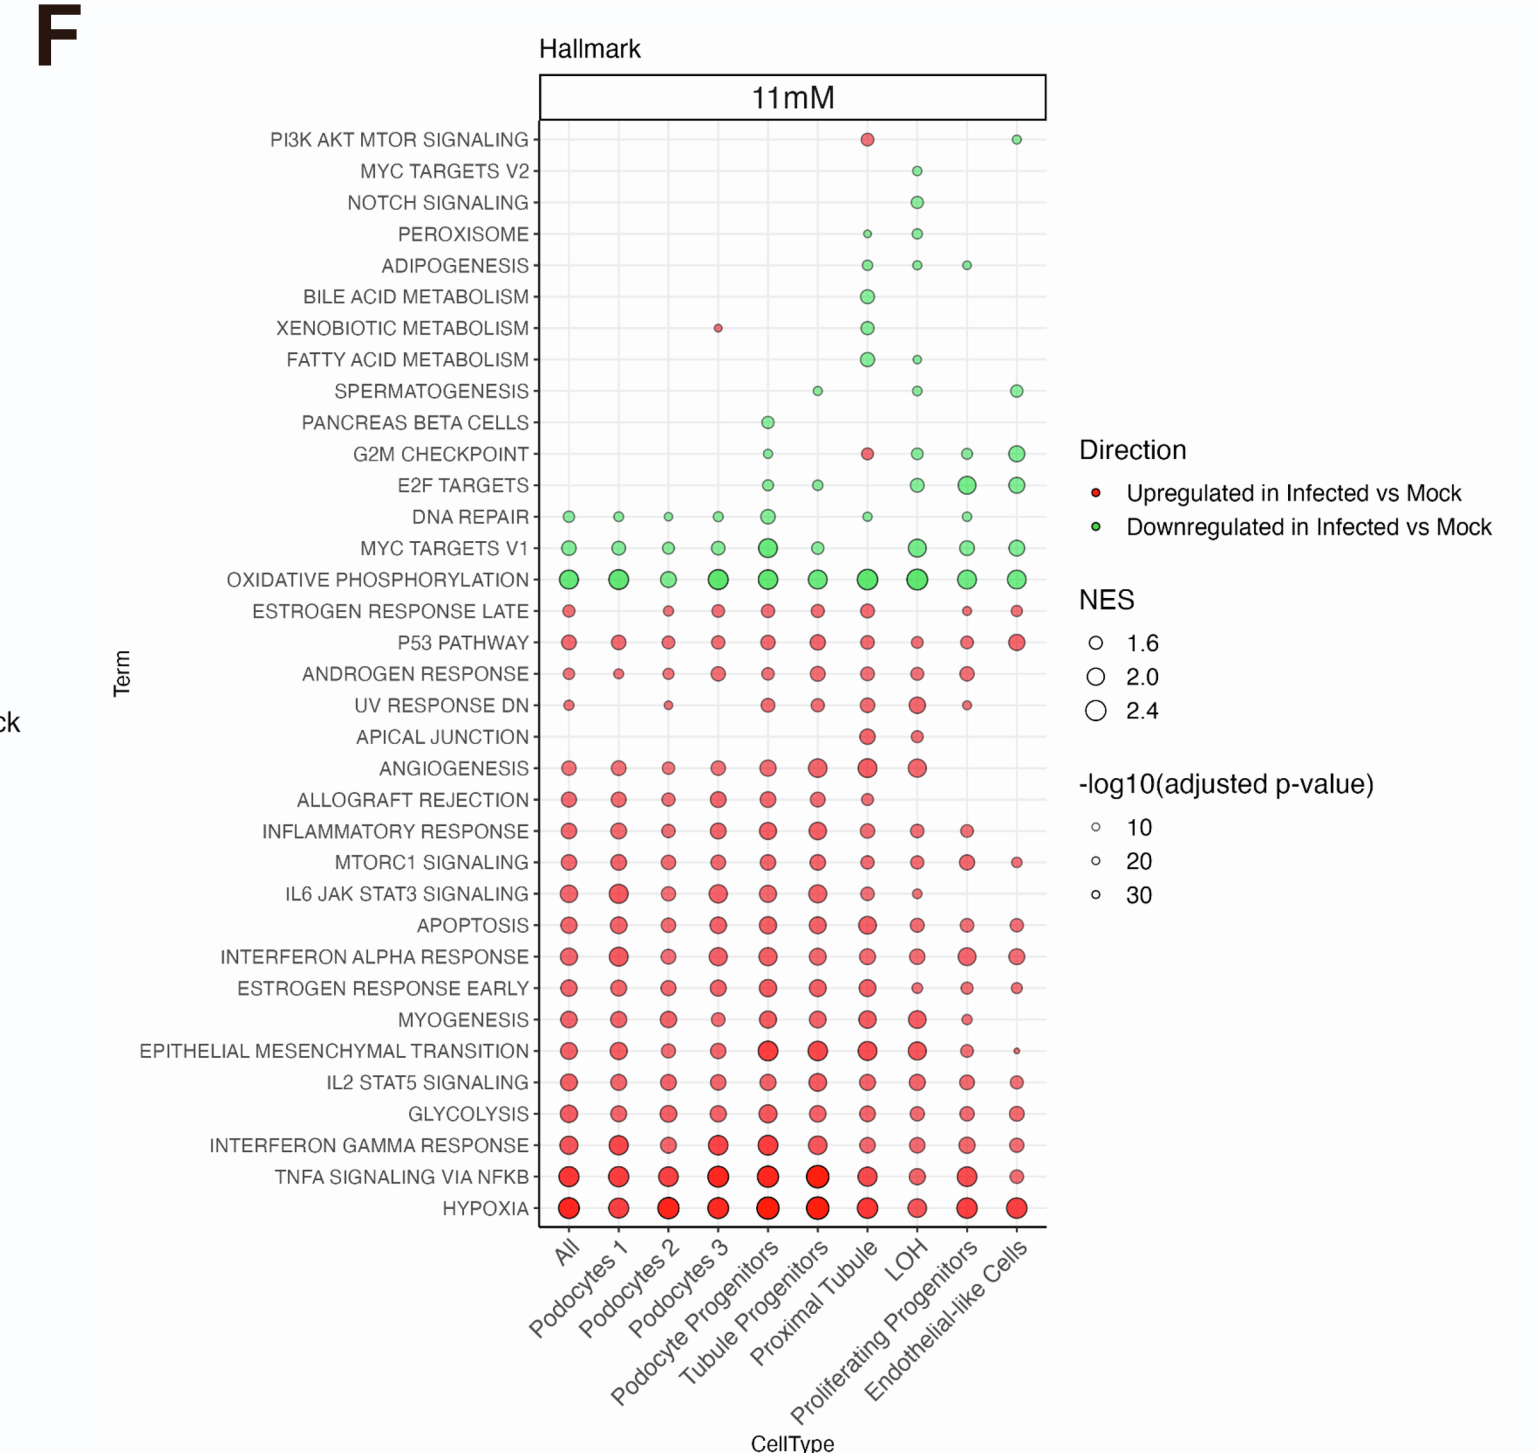



**Figure S4. Single Cell RNA Sequencing Analysis of SARS-CoV-2 Infected Human Kidney Organoids exposed to 11 mM Glucose Conditions, Related to Figure 3.**

- A) Schematics for the infection of kidney organoids under 11 mM glucose conditions. Uniform manifold approximation and projection (UMAP) of kidney organoids at 1 dpi with SARS-CoV-2 ( $10^6$  virus particles/organoid as determined in Vero cells). Clusters are colored by cell type annotation.
- B) Cell type proportions in the indicated kidney organoid samples after discarding non-renal cells and Proliferating Progenitors 2 clusters.
- C) UMAPs for *ACE2*, *TMPRSS2* and SARS-CoV-2 mRNA expression in kidney organoids exposed to 11 mM glucose at 1dpi. For SARS-CoV-2, expression is considered as undetectable for cells expressing  $< 5$  UMIs. Cells are color-coded based on the expression levels. The violin plots in the bottom panels represent expression level in cells expressing the gene of interest (*ACE2* or *TMPRSS2*) and in cells expressing  $\geq 5$  UMIs for SARS-CoV-2 mRNA for the indicated cell types.
- D) Gene over-representation analysis using the Hallmark database considering DEGs (adjusted p-value  $< 0.05$  and  $\log_{2}FC > 0.1$ ) to compare Mock and SARS-CoV-2 infected kidney organoids ( $10^6$  virus particles/organoid as determined in Vero cells) cultured in 11 mM glucose. Each column corresponds to the analysis of DEG upregulated in each condition. Only the ten gene sets with lowest adjusted p-value in each comparison are shown. Circles are coded by color (p-value) and size (Odds ratio).
- E) Differentially expressed genes (DEGs) in SARS-CoV-2 infected ( $10^6$  virus particles/organoid as determined in Vero cells) against Mock samples in 11 mM glucose considering only renal-like cell types (Podocytes 1/2/3, PT, LOH, Tubule Progenitors, Podocyte Progenitors, Proliferating Progenitors y Endothelial-like cells). In the volcano plot, the x-axis indicates log fold change (FC) and the y-axis indicates statistical significance with the  $-\log_{10}(p\text{-value})$ . Genes with an adjusted p-value  $< 0.05$  are considered upregulated (red) if the  $\log_{2}FC > 0.1$  and downregulated (blue) if the  $\log_{2}FC < -0.1$ . Non DEG are shown in grey.
- F) A hallmark gene set enrichment analysis (GSEA) was performed for kidney organoids cultured in 11 mM glucose comparing SARS-CoV-2 infected ( $10^6$  virus particles/organoid as determined in Vero cells) versus Mock samples. The ten gene sets per direction and sample with lowest adjusted p-value are shown. Each column corresponds to one of the comparisons. Circles are coded by color (direction), size (NES) and transparency (p-value).

A

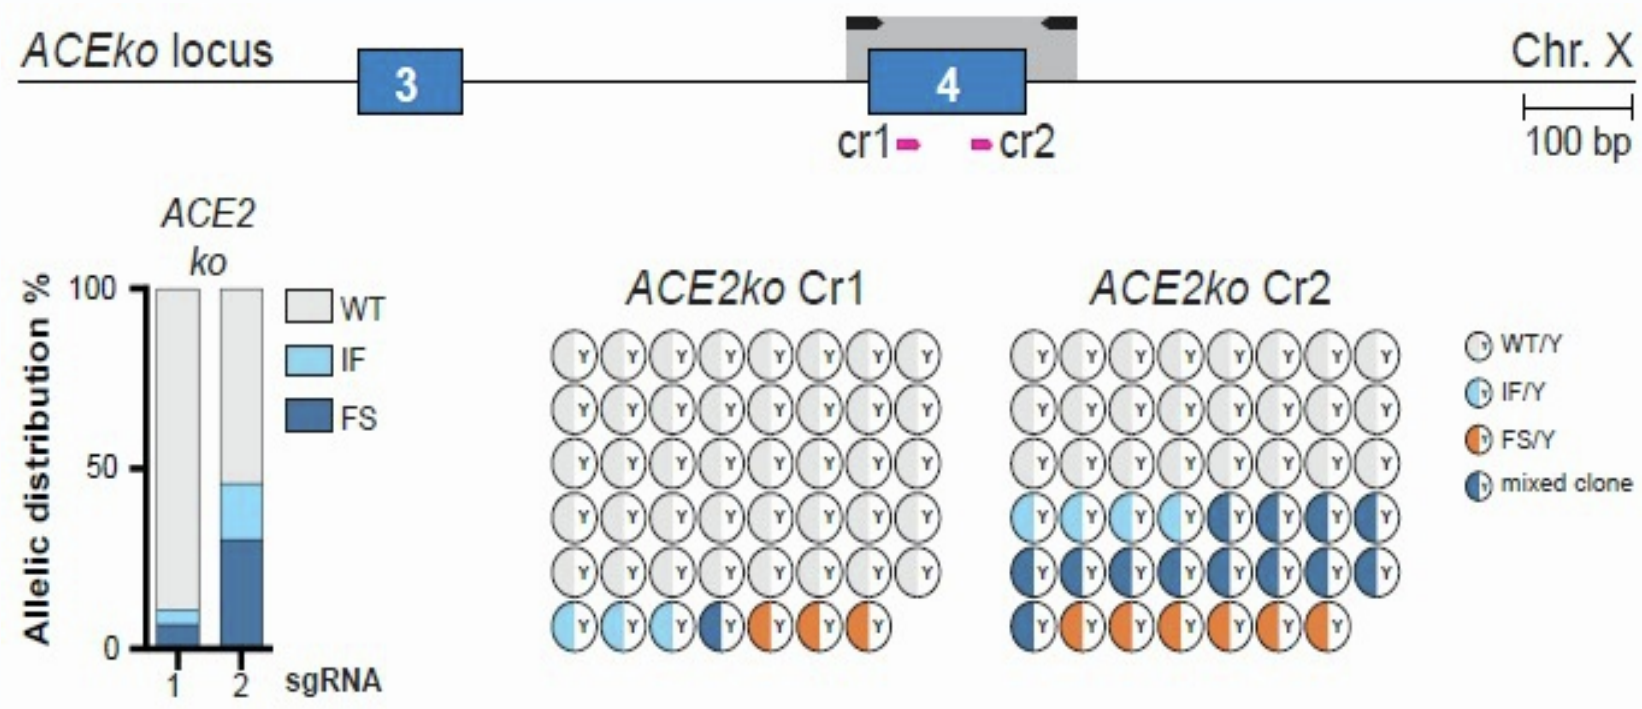

B

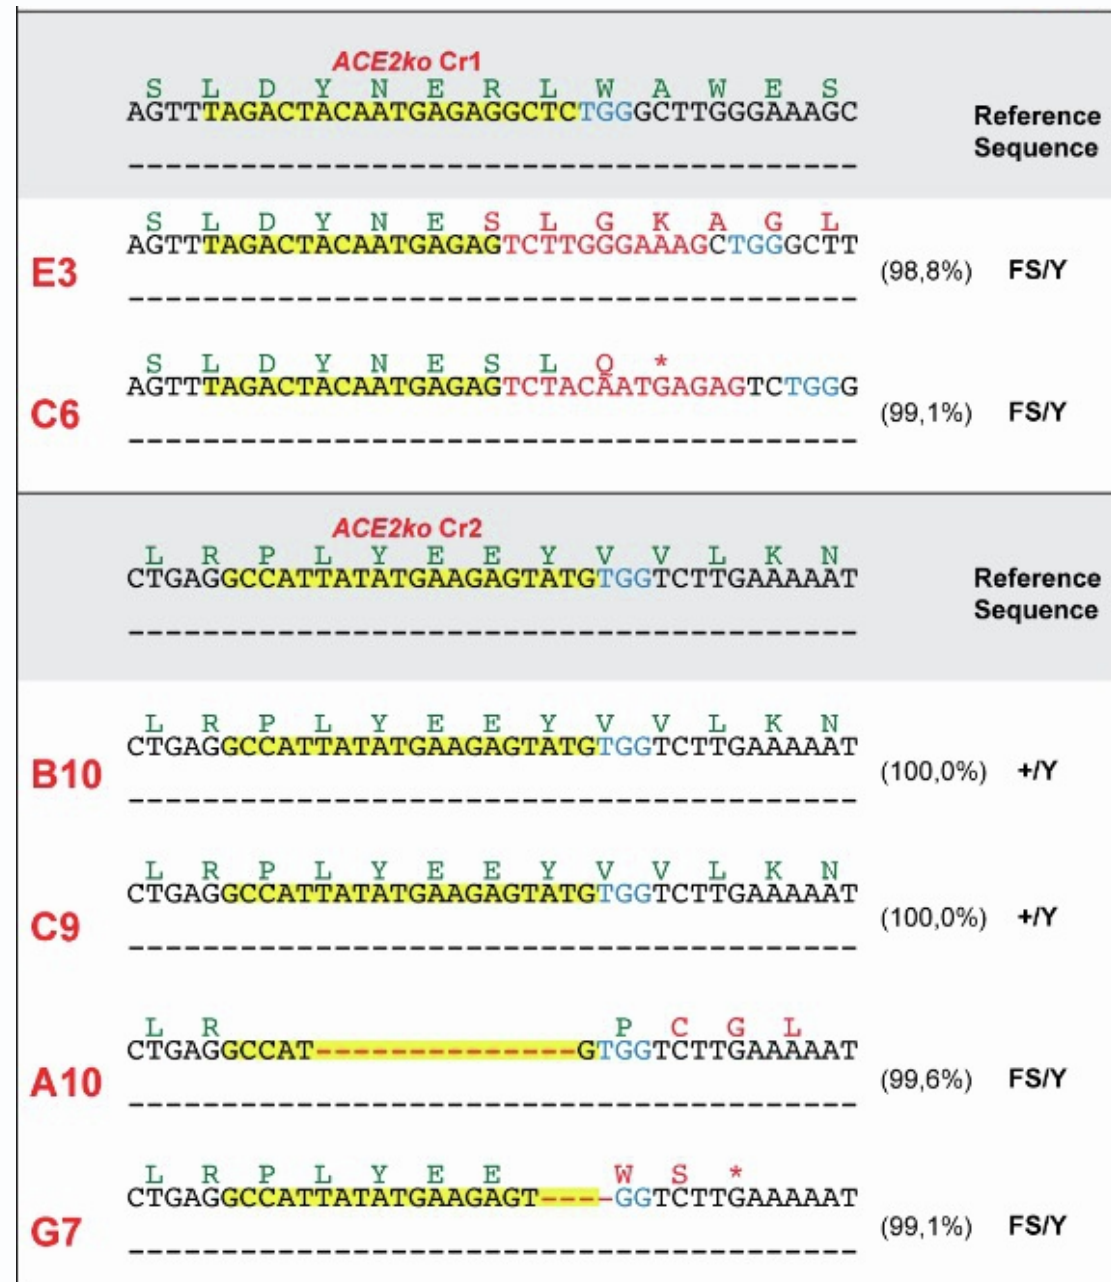

C

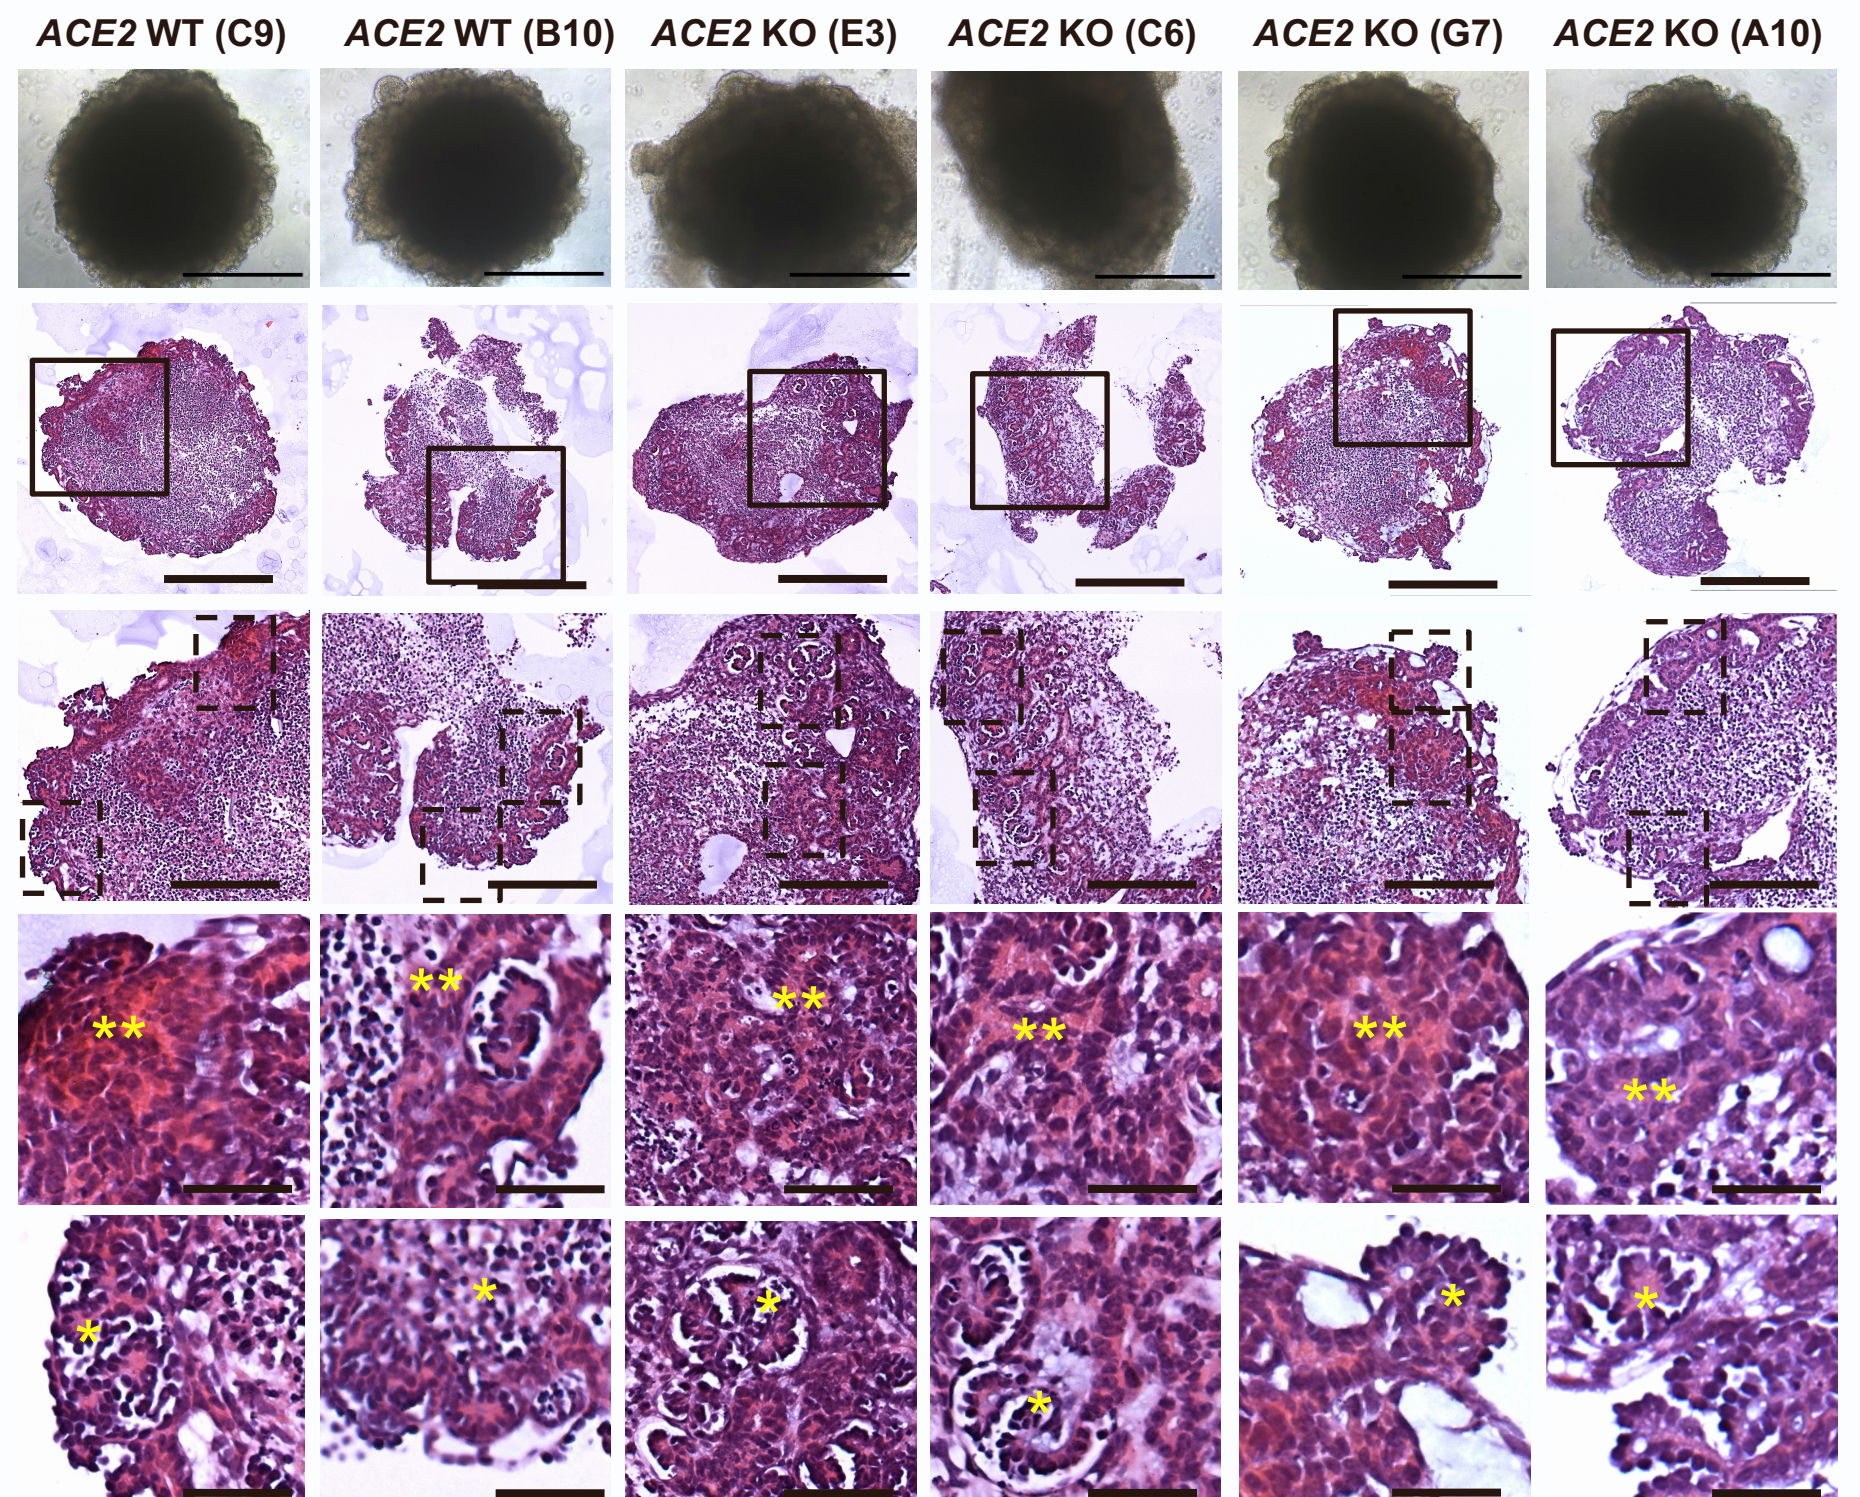

D

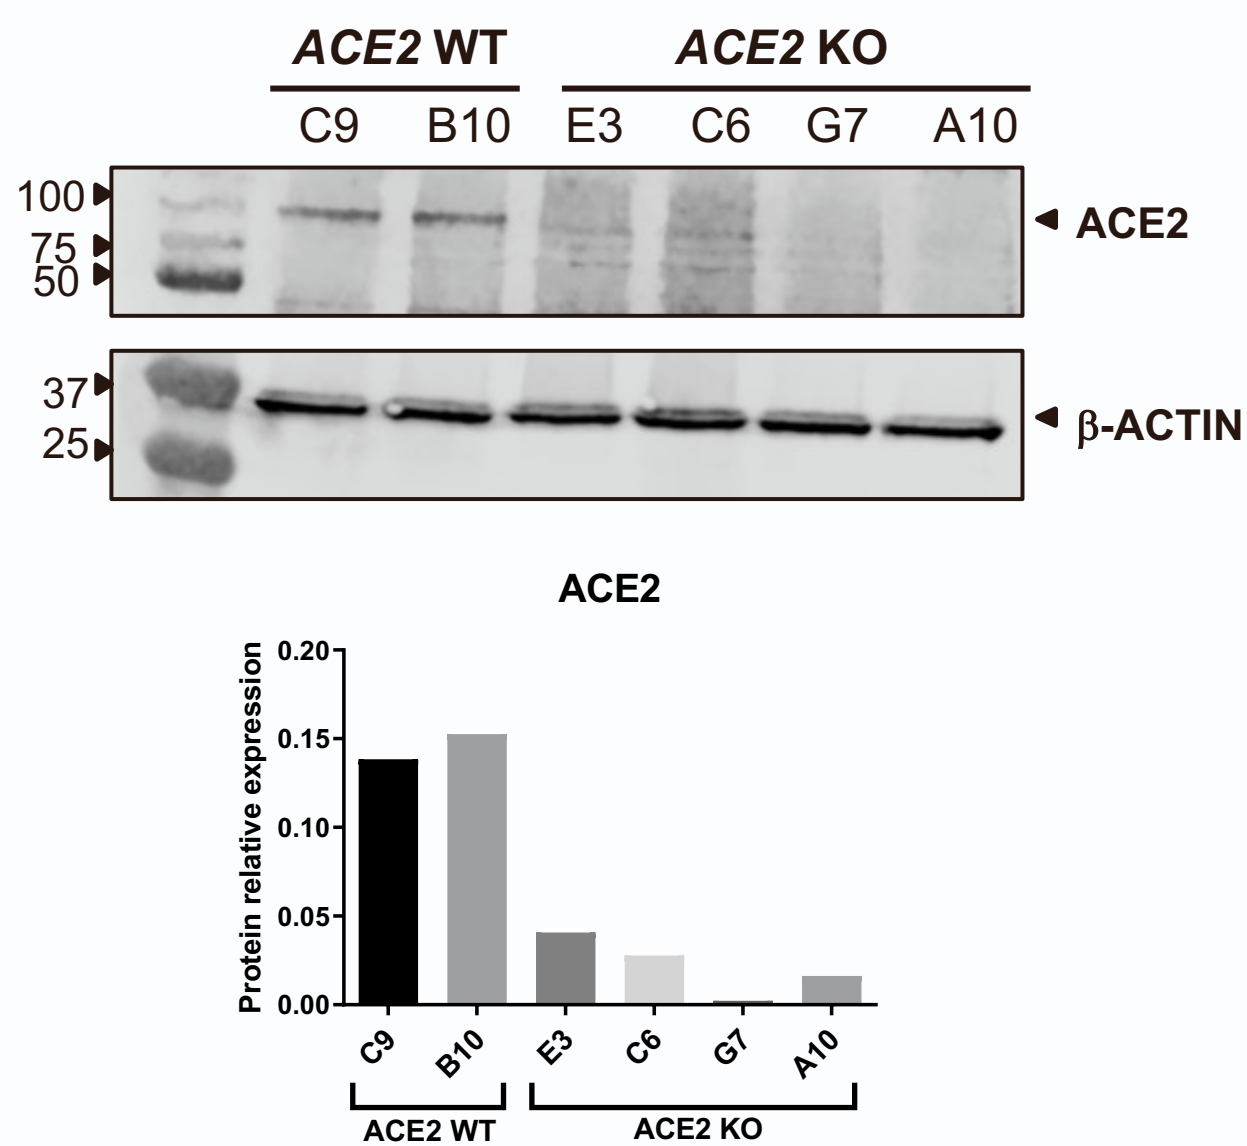

E

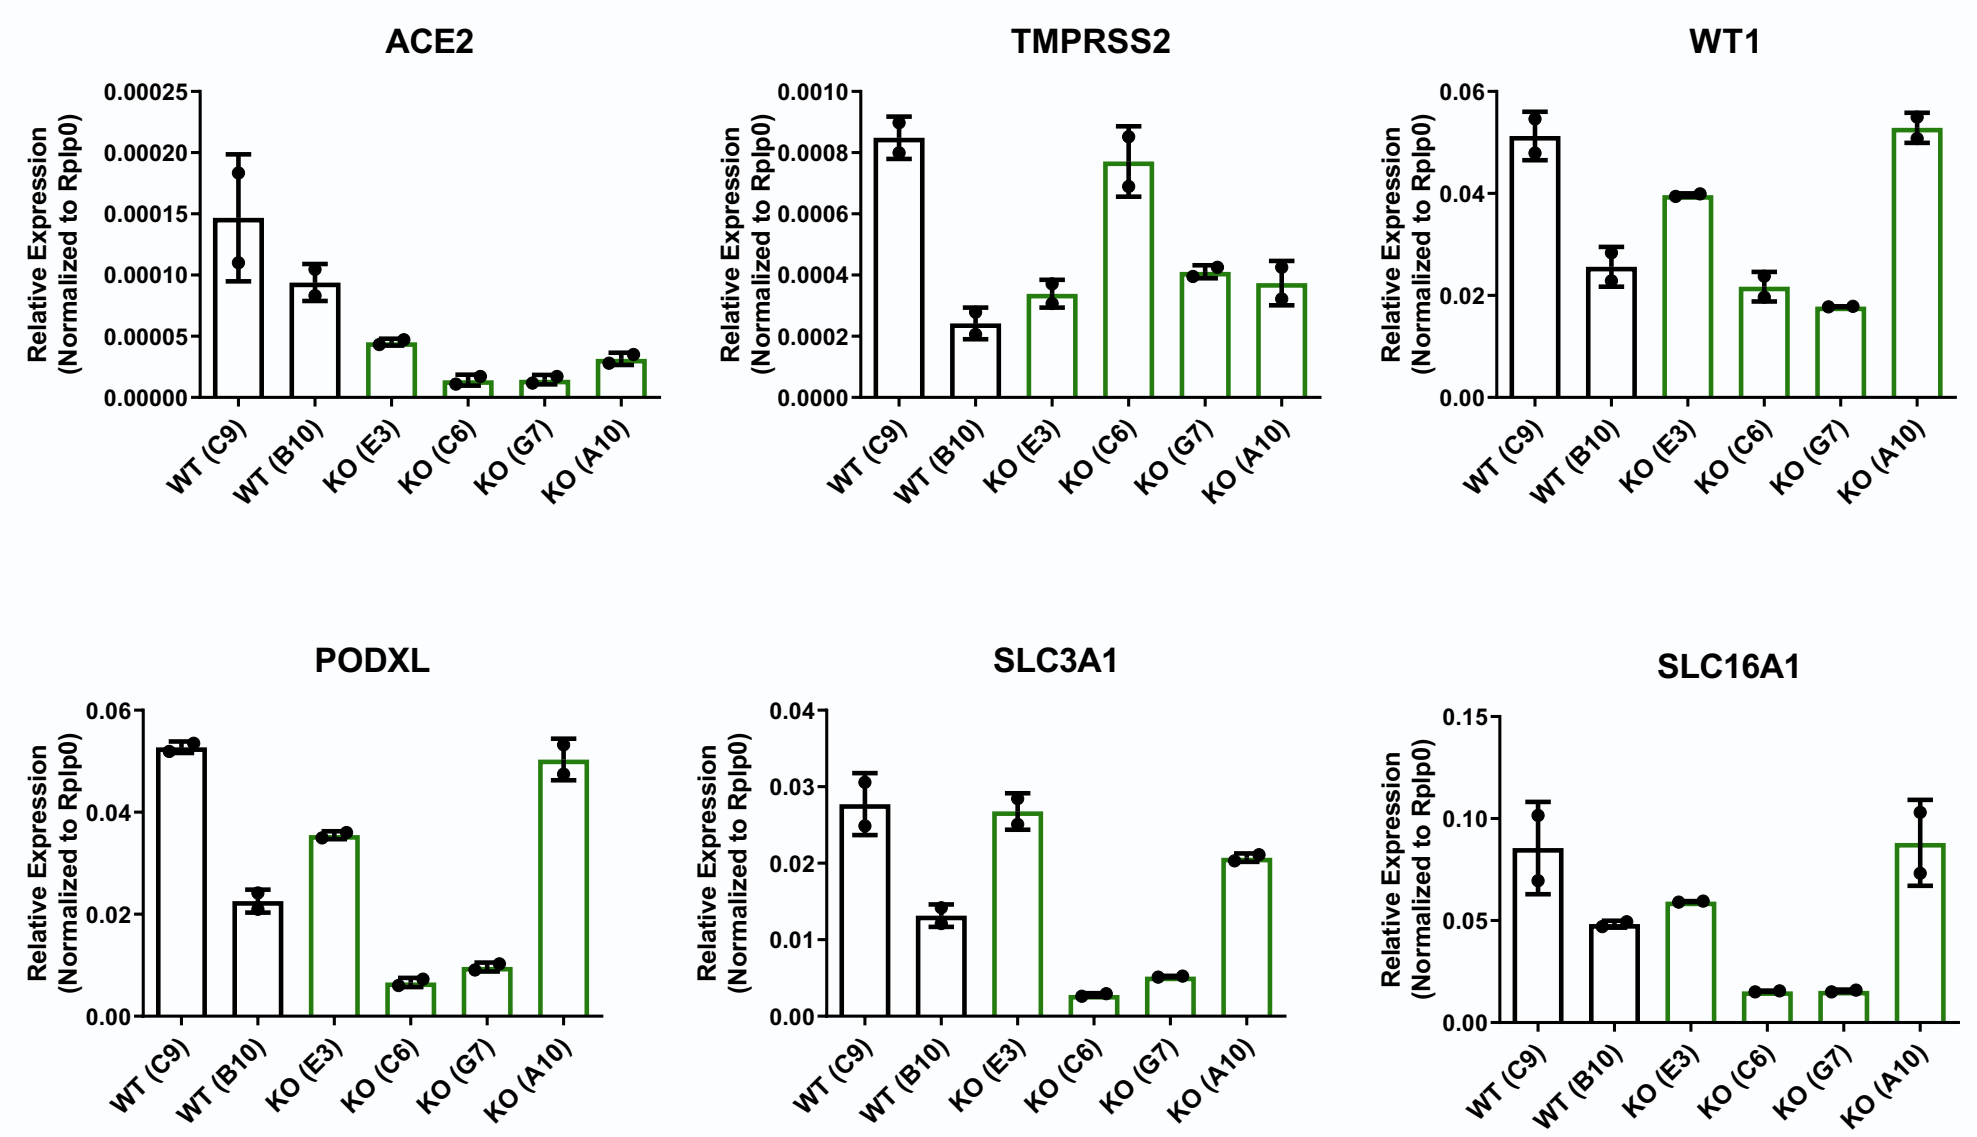

**Figure S5. Generation and Infection of *ACE2* KO Human Kidney Organoids, Related to Figure 4.**

- A) Schematic of Cas9/gRNA-targeting sites (pink arrows) in *ACE2* locus showing exon structure (blue boxes) and PCR amplicons (light gray boxes in all figures in this study). Histogram shows allelic sequence distribution after the transfection of the different gRNAs in undifferentiated human pluripotent stem cells expressing an inducible Cas9 (iCas9). wt, wild-type; mut, mutation; FS, frameshift.
- B) Representative sequence of the wild type (+Y) or *ACE2* mutant clones generated with the different gRNAs.
- C) Representative phase contrast images of *ACE2* WT and *ACE2* KO kidney organoids. Scale bars, 250  $\mu$ m. Same specimens were analyzed by Hematoxylin and Eosin staining showing tubular-like (\*\*) and glomerular-like (\*) structures. Scale bars, 250  $\mu$ m, 100  $\mu$ m (magnified views); 50  $\mu$ m (magnified views from dashed line boxes).
- D) Protein levels of ACE2 in the generated clones as determined by Western Blot.  $\beta$ -ACTIN was used as loading control. Quantification of changes in ACE2 protein expression is shown. The data are represented as mean  $\pm$  s.d.  $n = 1$  independent experiment from a pool of 12 organoids/group.
- E) mRNA expression level of *ACE2* and *TMPRSS2*, podocyte markers (*WT1* and *PODXL*) and proximal tubular markers (*SLC3A1* and *SLC16A1*) in *ACE2* WT and *ACE2* KO kidney organoids. The data are represented as mean  $\pm$  s.d.  $n = 1$  independent experiment from a pool of 12 organoids/group with at least two technical replicates each.

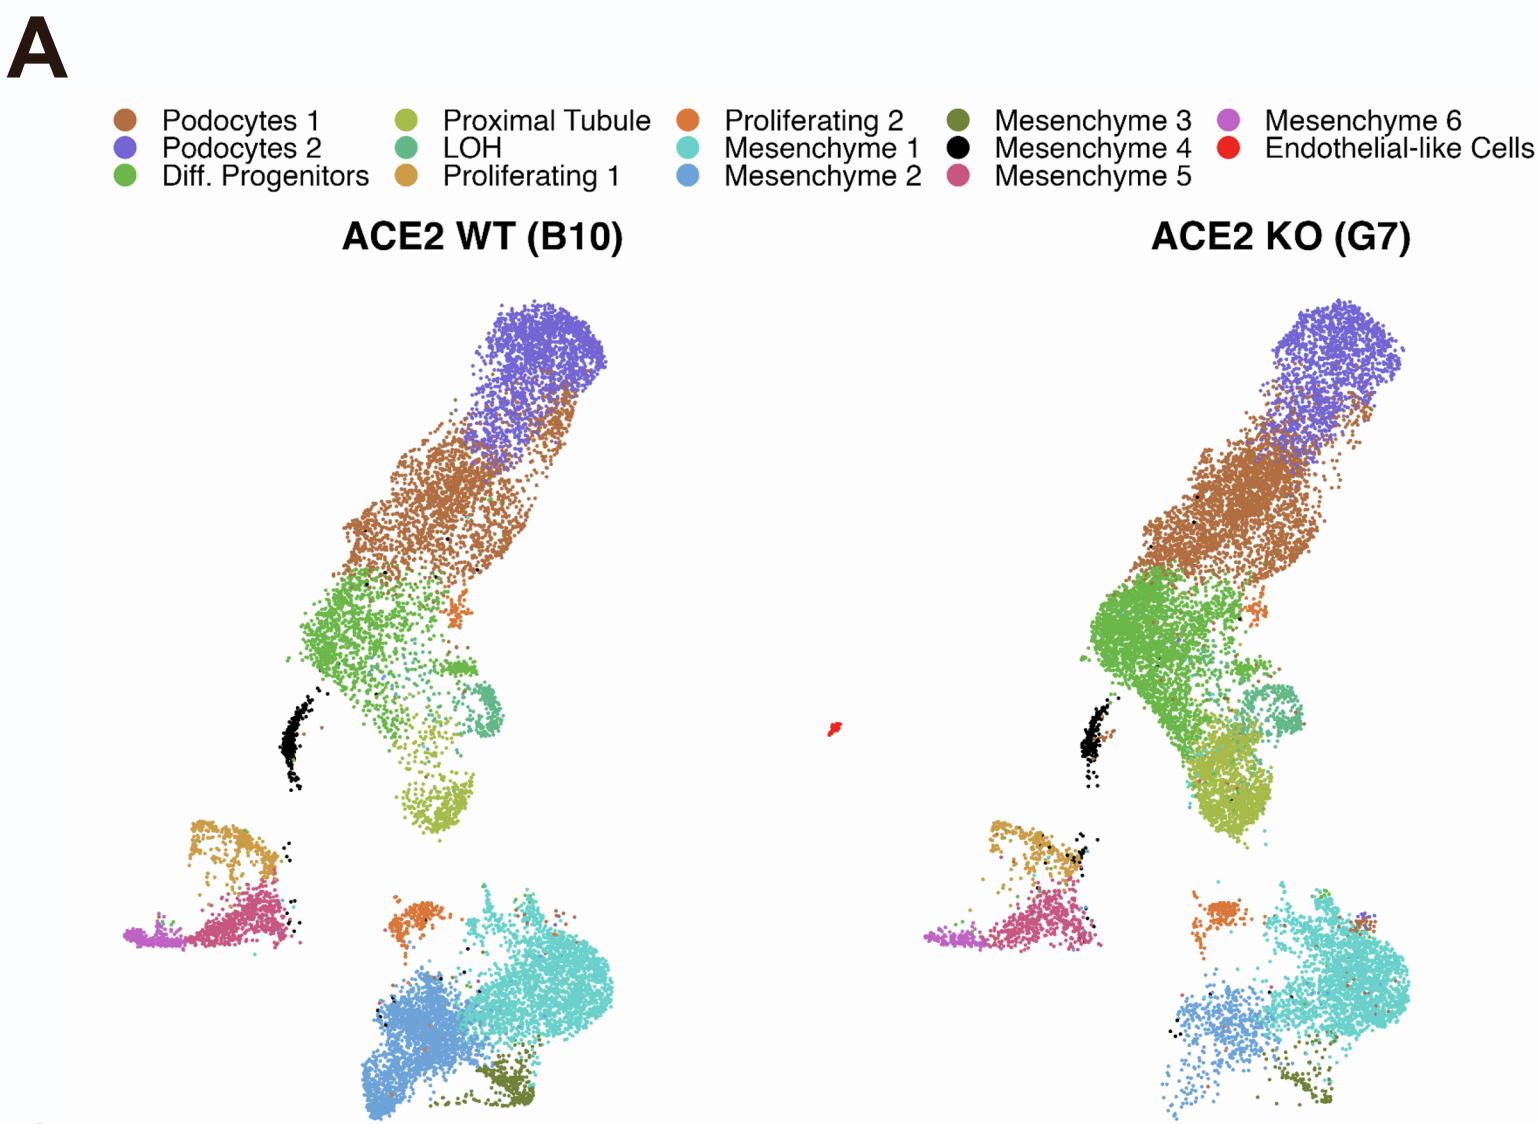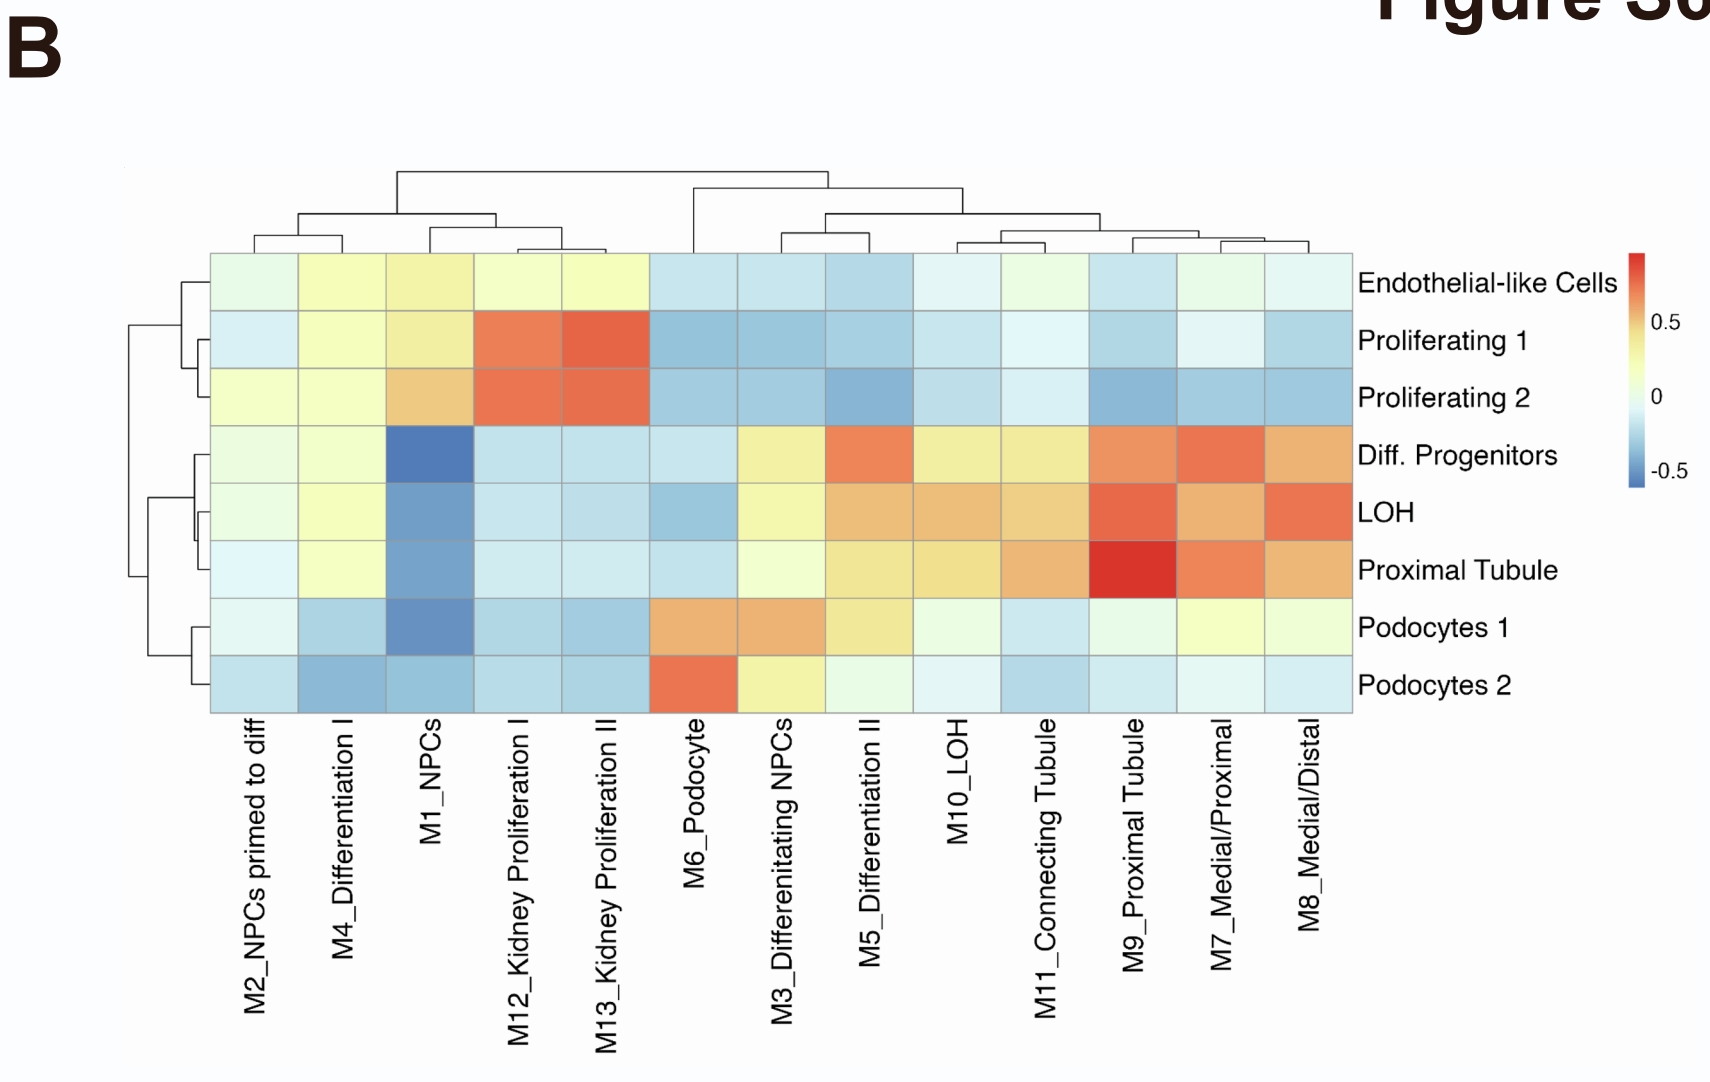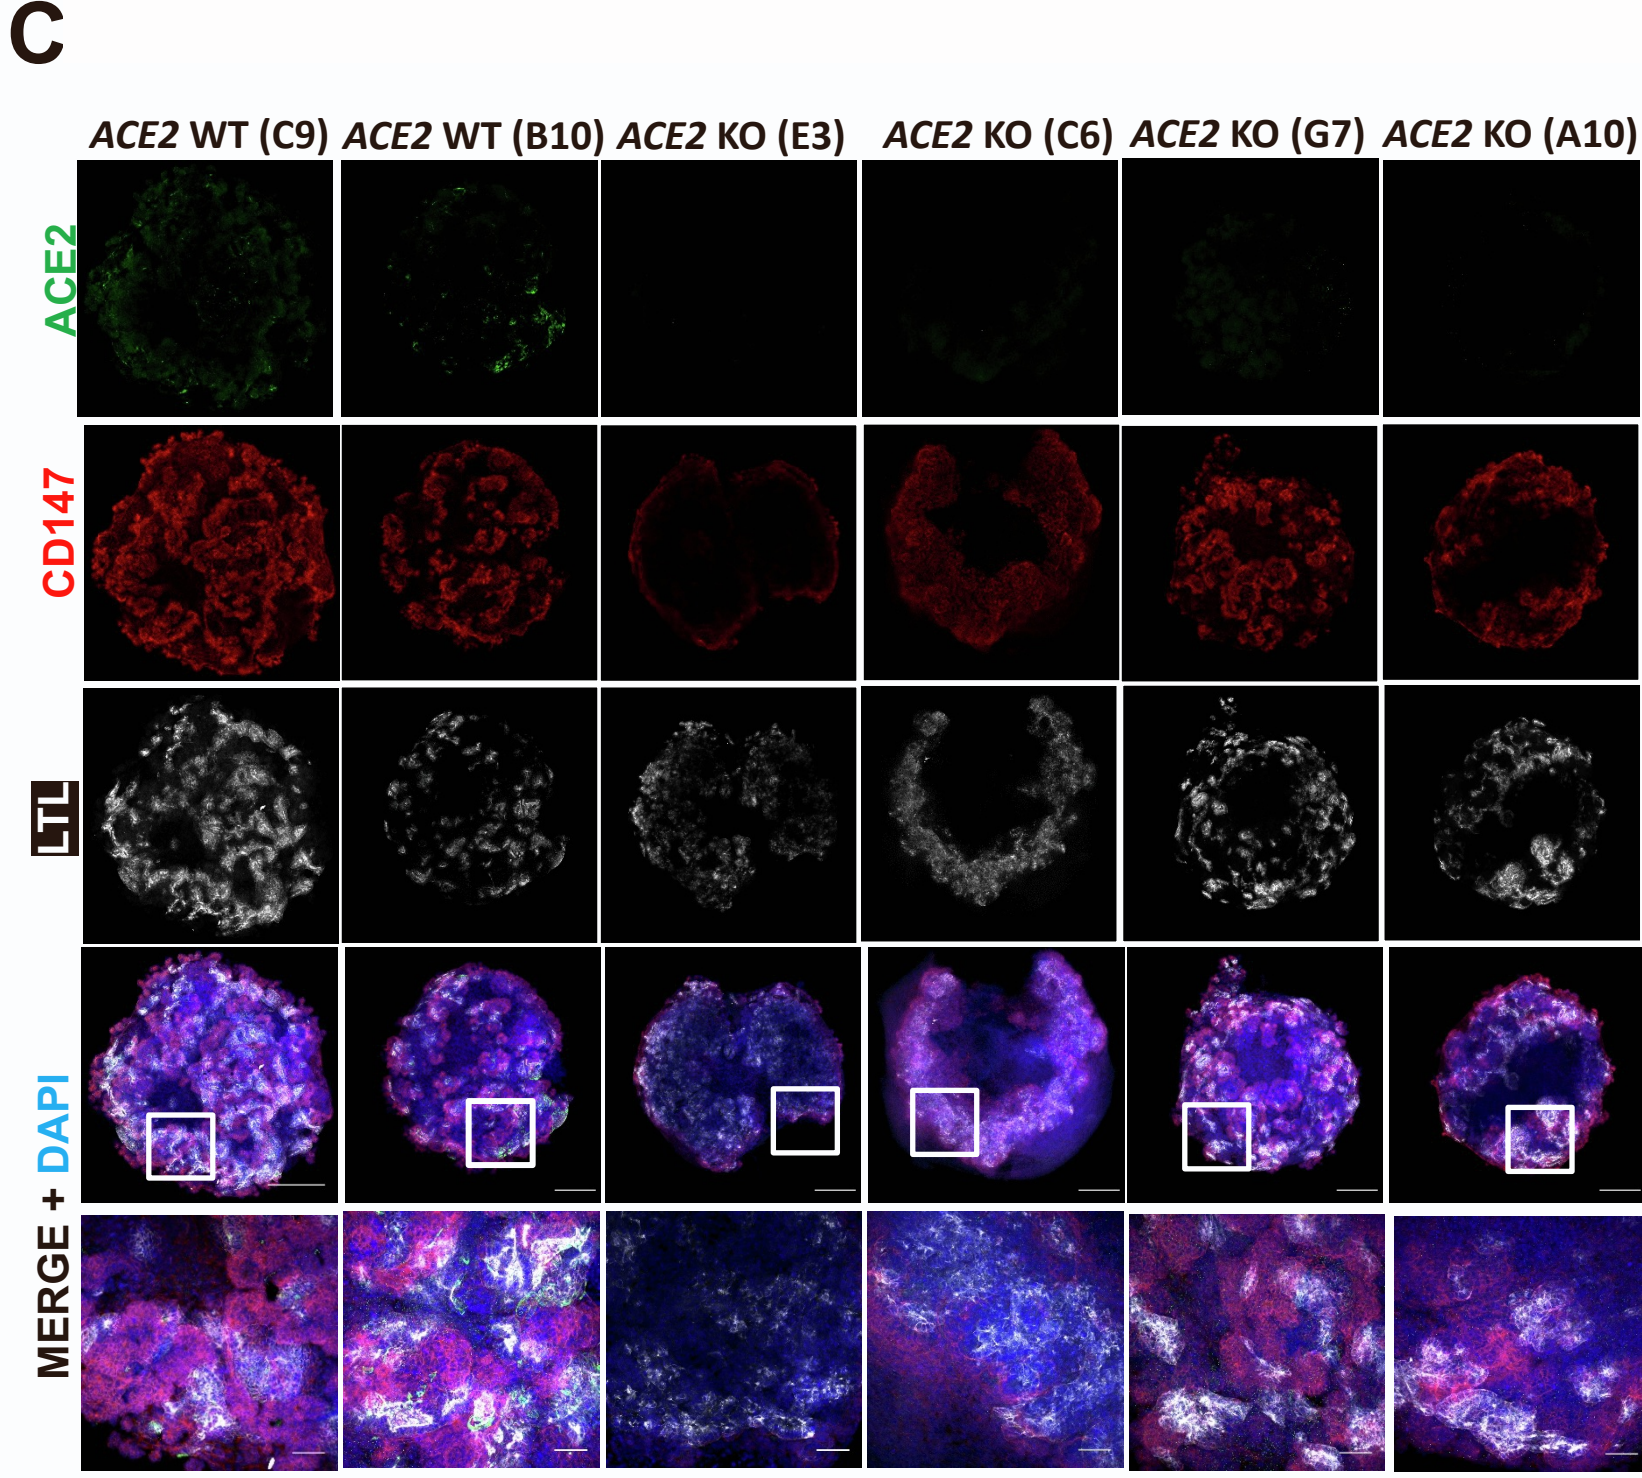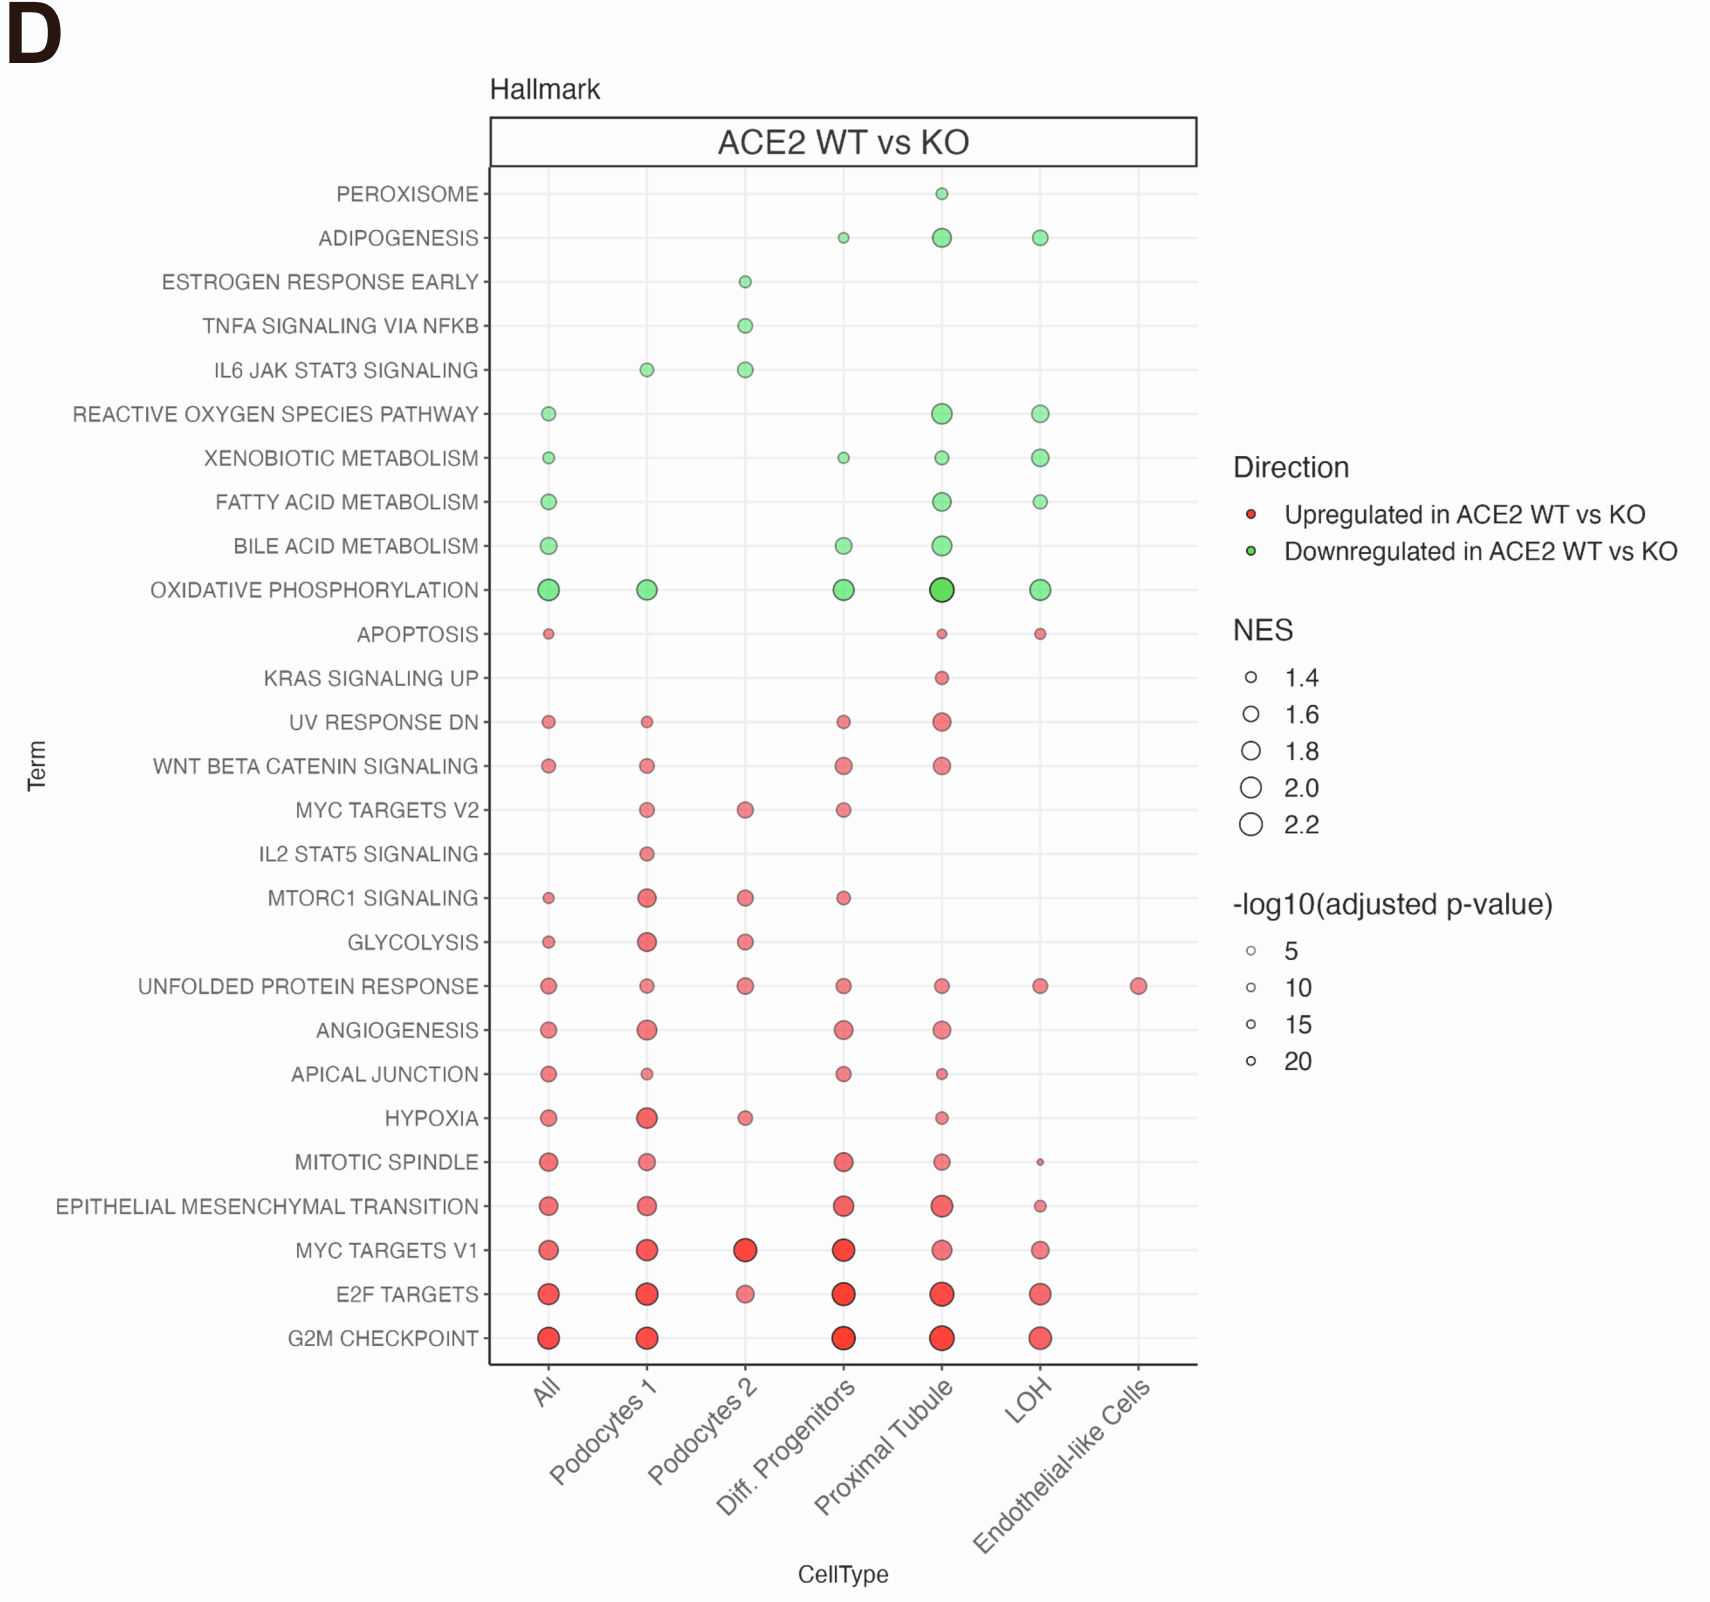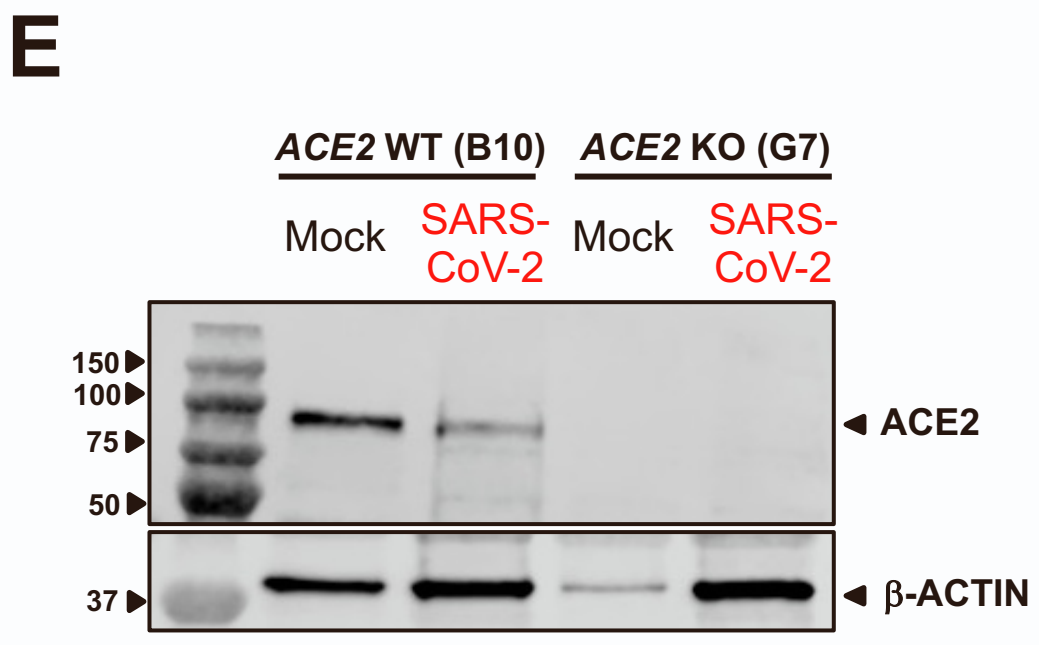

**Figure S6. SARS-CoV-2 Infection in ACE2 KO Human Kidney Organoids, Related to Figure 4.**

- A) UMAP of *ACE2* WT kidney organoids (generated from clone B10) and *ACE2* KO kidney organoids (generated from *ACE2* KO clone G7) colored by annotated cell types.
- B) Correlation analysis between scores for gene modules from second semester fetal-kidney cell types and scores for gene signatures from the annotated renal-like cell types in *ACE2* WT and *ACE2* KO kidney organoids. Scores were obtained with the *AddModuleScore* function from Seurat. Color scale denotes Pearson correlation coefficients.
- C) Immunofluorescence staining for ACE2 (green), CD147 (red), LTL (grey) and DAPI (blue) in *ACE2* WT and *ACE2* KO kidney organoids. Scale bars, 250  $\mu\text{m}$ , 50  $\mu\text{m}$  (magnified views).
- D) Hallmark gene set enrichment analysis (GSEA) was performed in kidney organoids generated from *ACE2* WT and *ACE2* KO lines. The ten gene sets per direction and sample with lowest adjusted p-value are shown. Circles are coded by color (direction), size (NES) and transparency (p-value).
- E) Protein levels of ACE2 in Mock treated and SARS-CoV-2 infected ( $10^6$  virus particles/organoid as determined in Vero cells) *ACE2* WT and *ACE2* KO kidney organoids are shown by Western Blot analysis.  $\beta$ -ACTIN was used as loading control. Data from a pool of 12 organoids/group is shown.

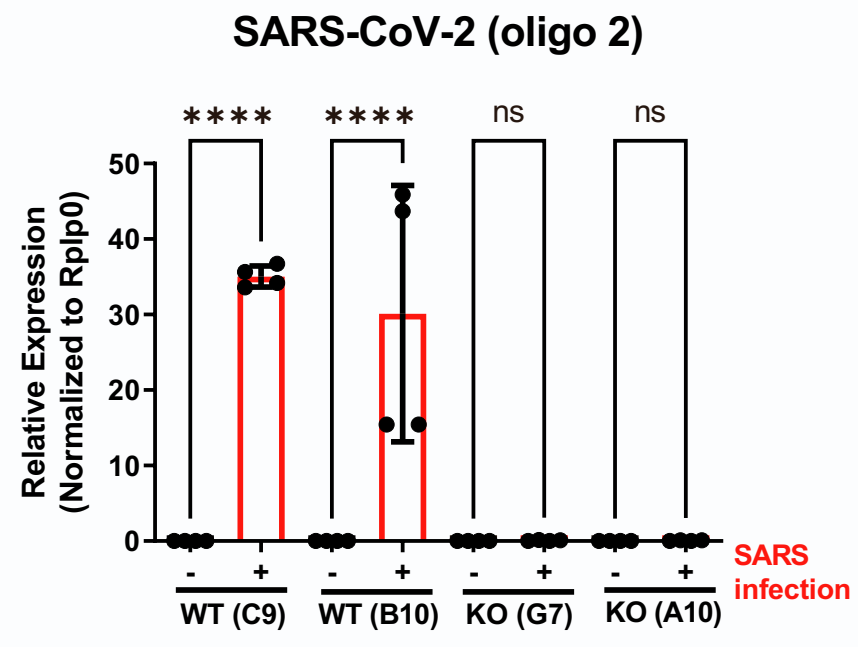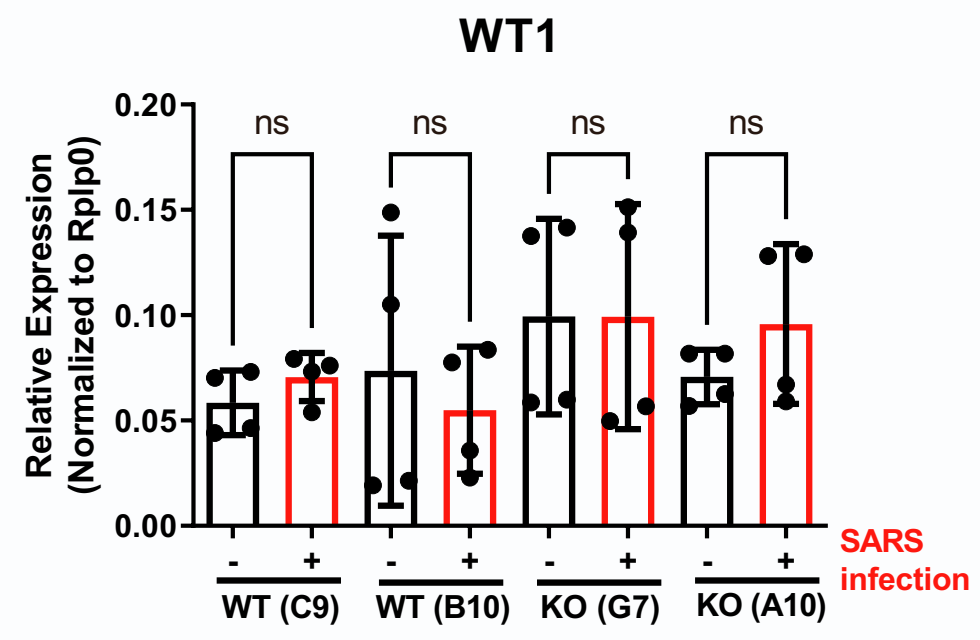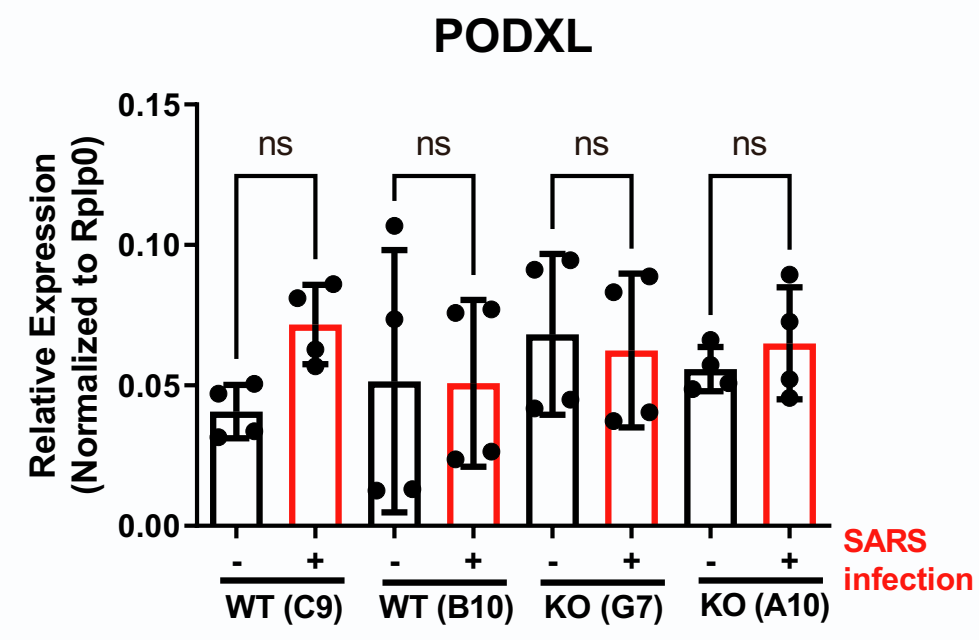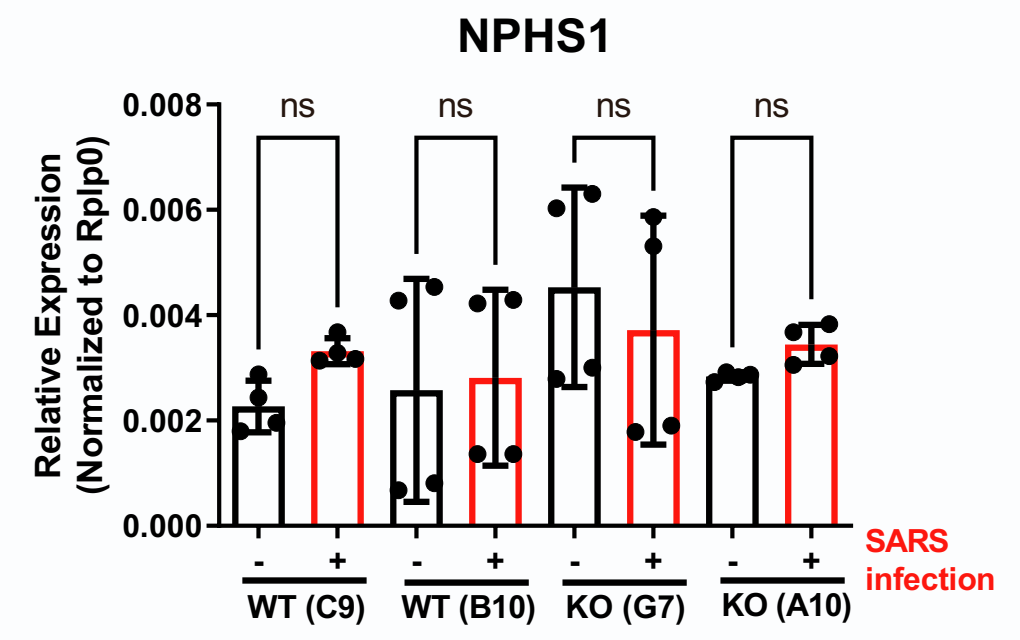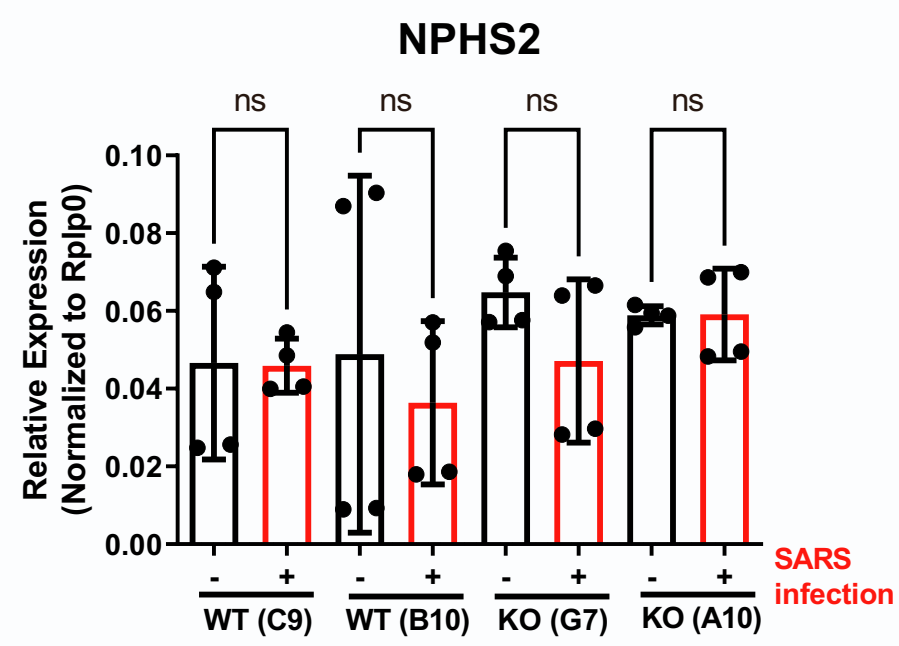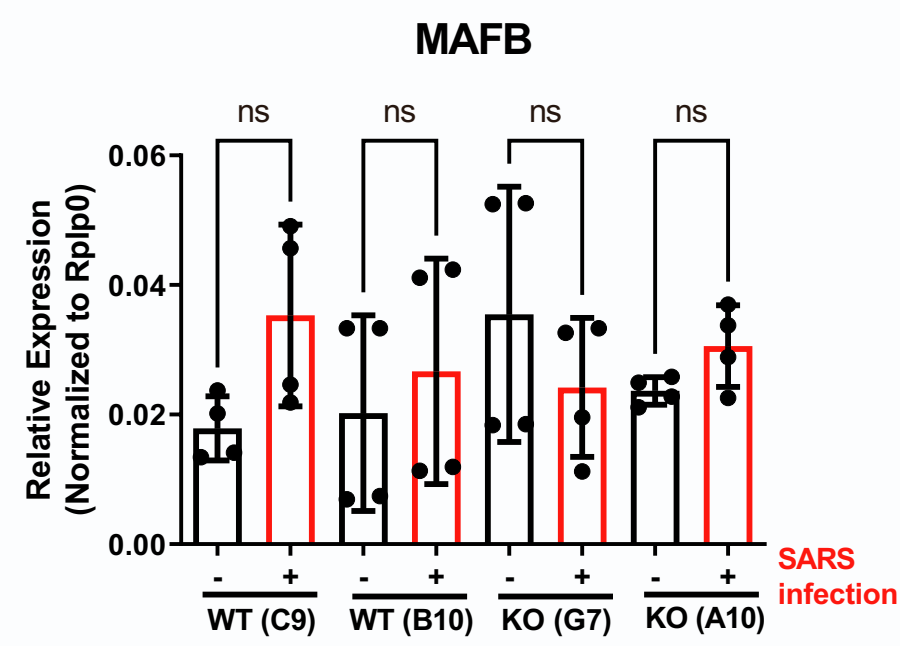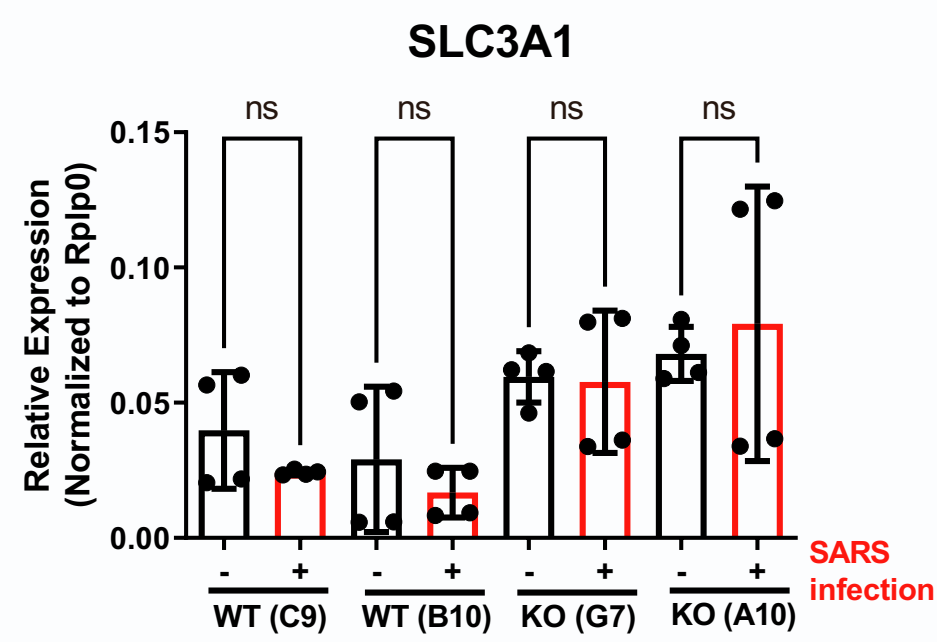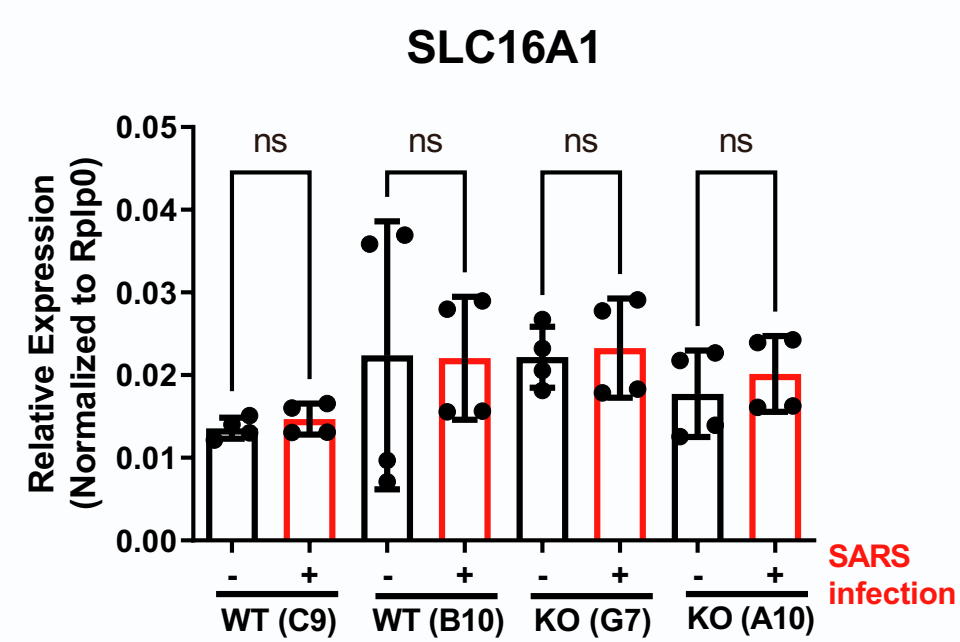

**Figure S7. SARS-CoV-2 Infection in ACE2 KO Human Kidney Organoids, Related to Figure 4.**

Quantitative real time analysis was performed at 3 dpi in Mock or SARS-CoV-2 infected ( $10^6$  virus particles/organoid as determined in Vero cells) ACE2 WT and ACE2 KO kidney organoids to quantify the mRNA expression levels of SARS-CoV-2, podocyte markers (*WT1*, *PODXL*, *NPHS1*, *NPHS2*, *MAFB*), and proximal tubular markers (*SLC3A1* and *SLC16A1*). Data from a pool of 12 organoids/group is shown. The data are represented as mean  $\pm$  s.d.  $n = 2$  independent experimental replicates from a pool of 12 organoids/group with at least two technical replicates each. \*\*\*\* $P < 0.0001$ , ns, no statistical significance, One-way ANOVA, Tukey's multiple comparisons test.

A

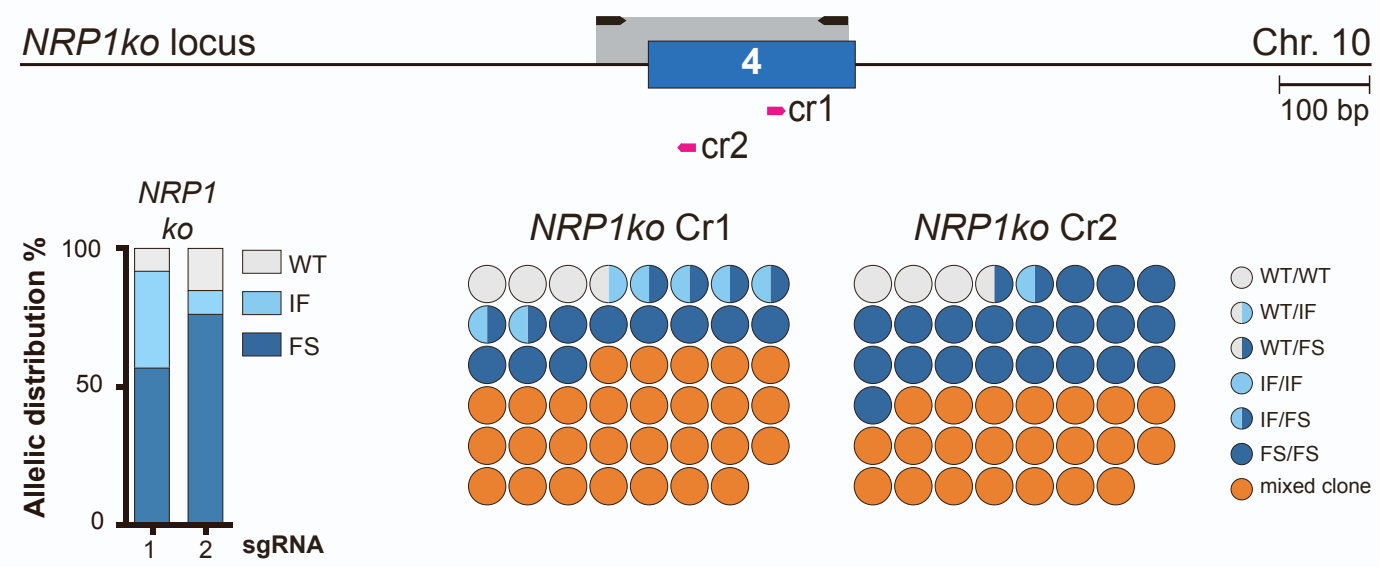

B

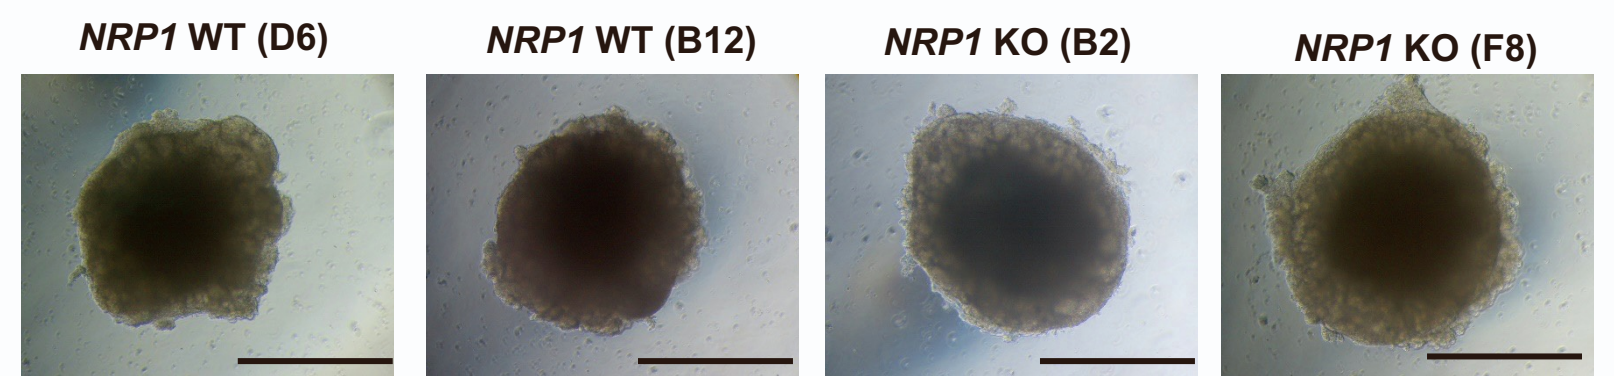

C

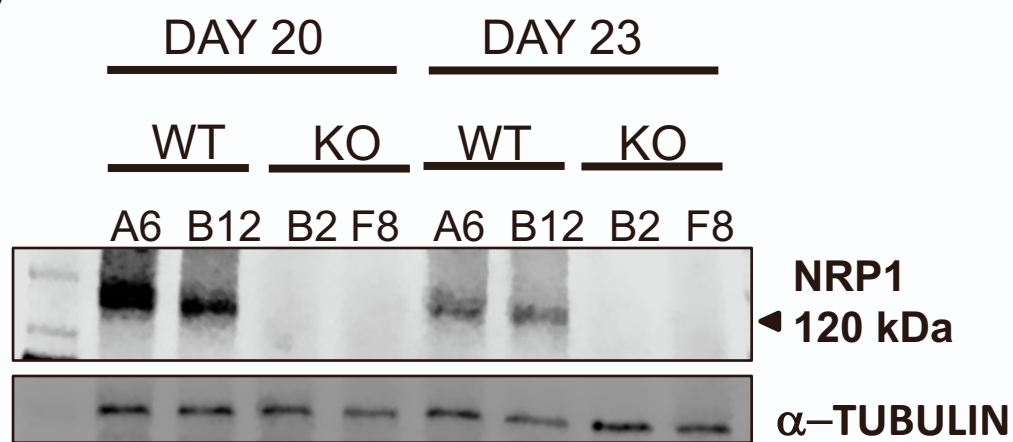

D

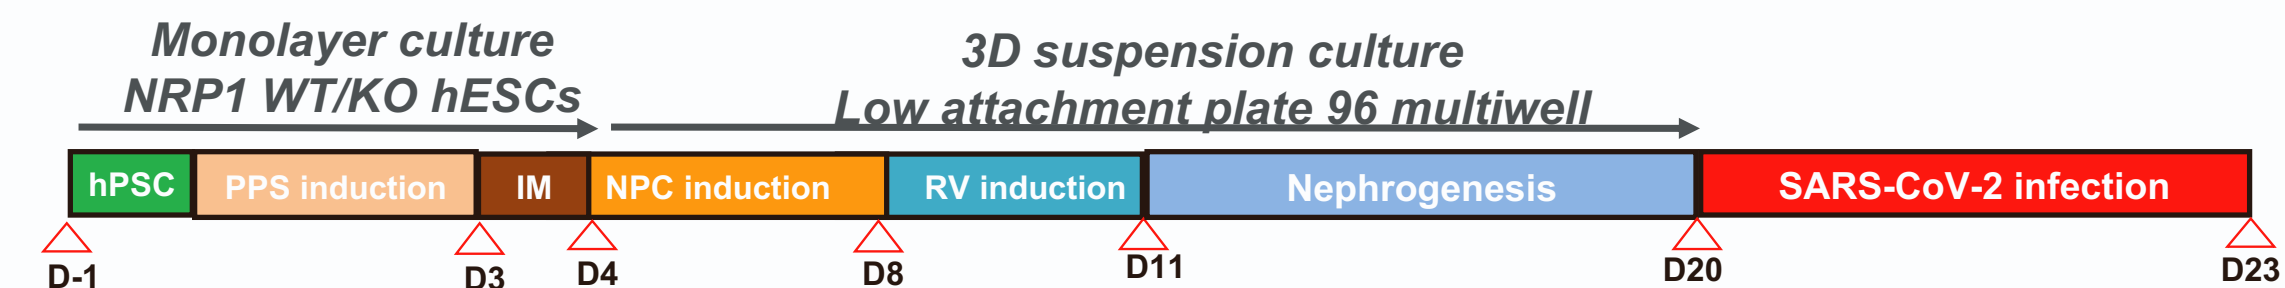

E

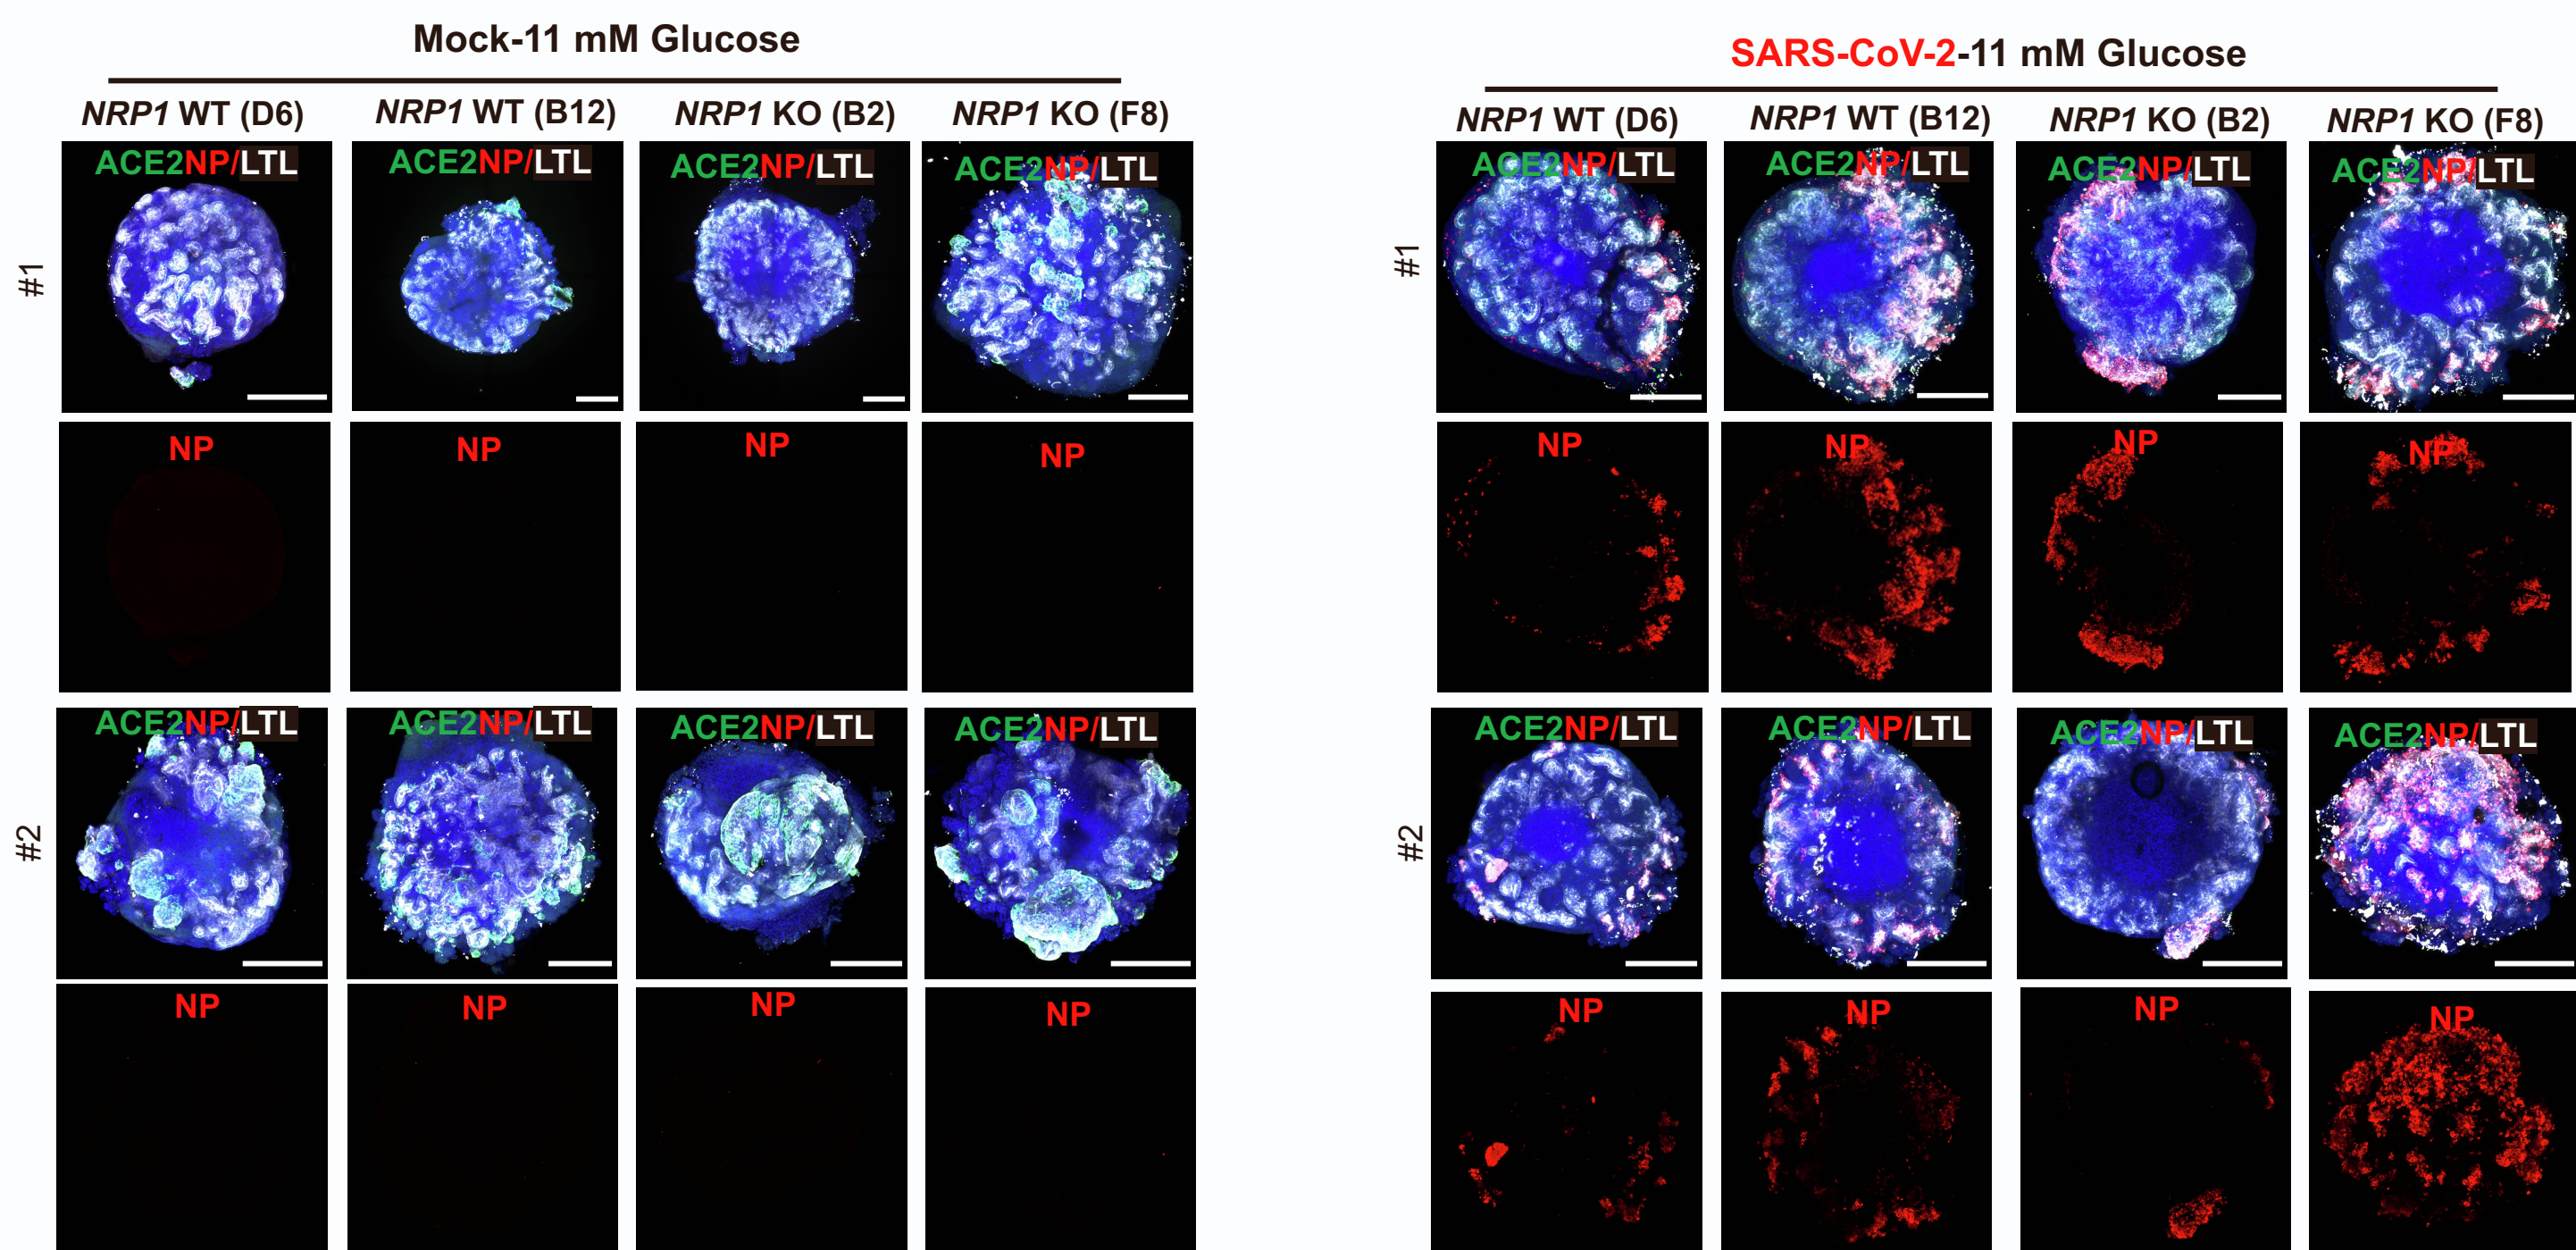

F

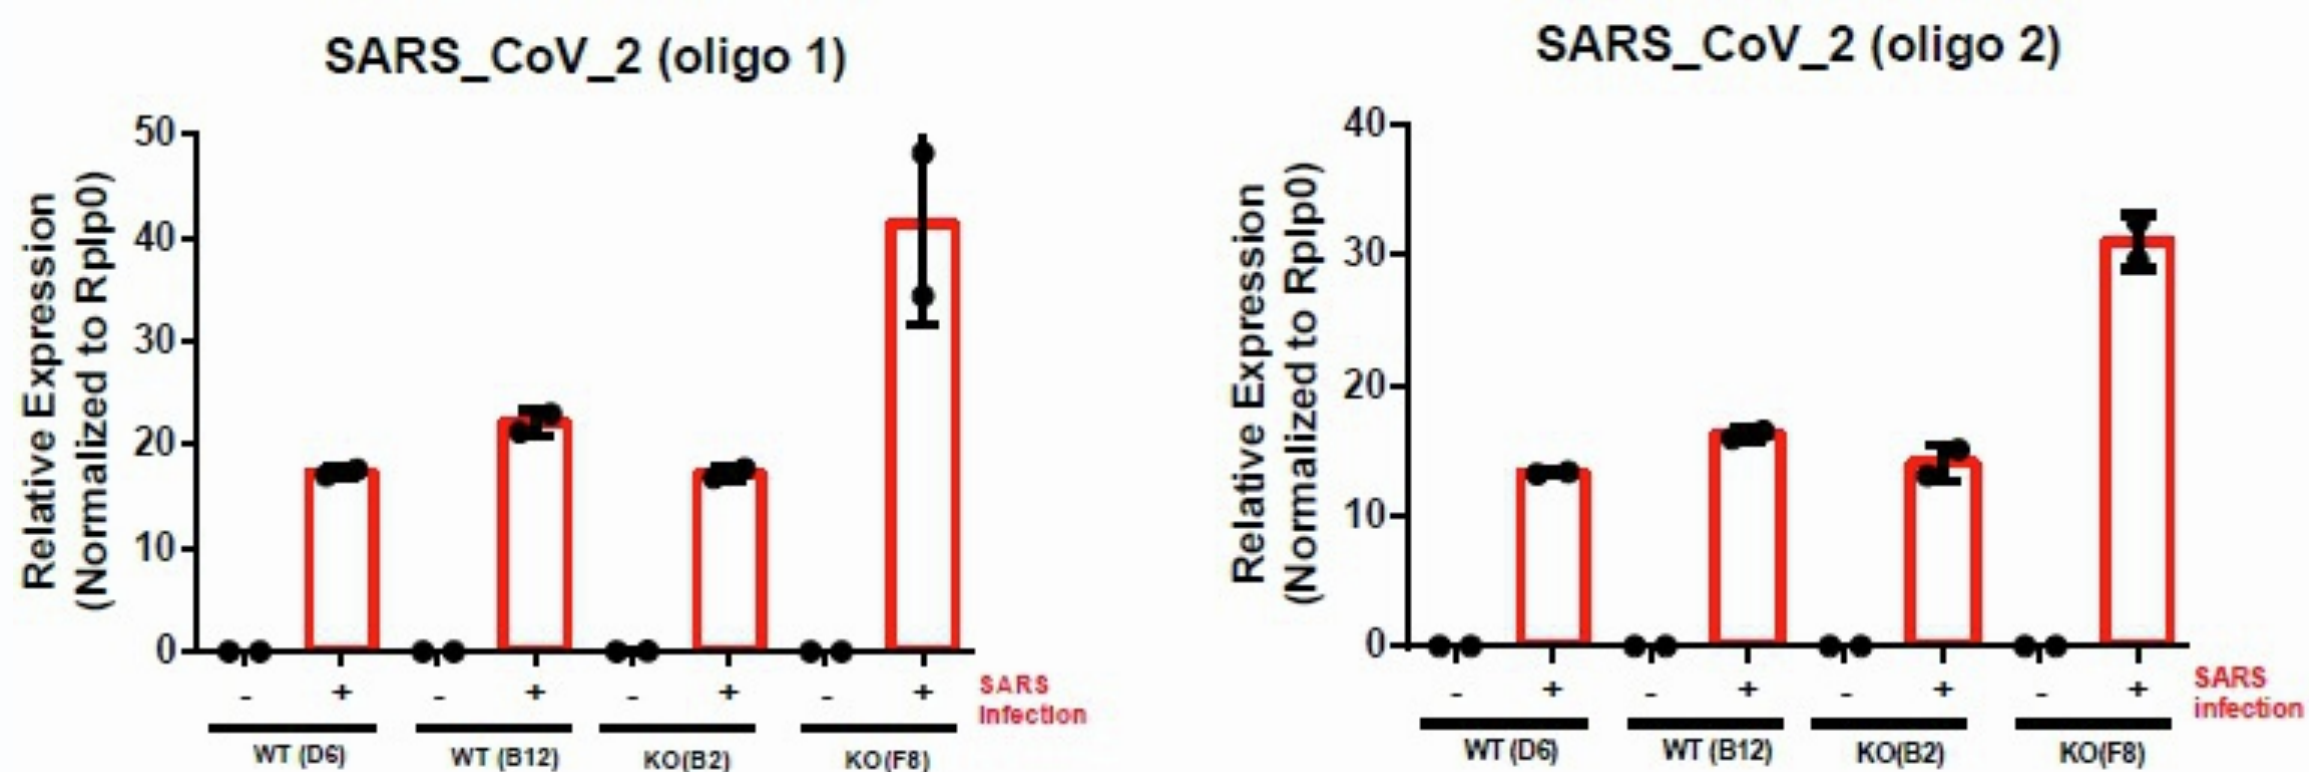



**Figure S8. Generation and Infection of *NRP1* KO Human Kidney Organoids, Related to Figure 4 and Figure 5.**

- A) Schematic of Cas9/gRNA-targeting sites (pink arrows) in the *NRP1* locus showing exon structure (blue boxes) and PCR amplicons (light gray boxes). Histogram shows allelic sequence distribution after the transfection of the different gRNAs in undifferentiated ES[4] cells expressing an inducible Cas9 (iCas9). wt, wild-type; mut, mutation; FS, frameshift.
- B) Representative bright field images of *NRP1* WT and *NRP1* KO kidney organoids. Scale bars, 250  $\mu$ m.
- C) Protein levels of NRP1 in *NRP1* WT and *NRP1* KO kidney organoids are shown by Western blot analysis.  $\alpha$ TUBULIN was used as loading control. Data from a pool of 12 organoids/group is shown.
- D) Experimental scheme for the generation and viral infection of *NRP1* WT and *NRP1* KO kidney organoids.
- E) Immunofluorescence was performed at 3 dpi in Mock treated or SARS-CoV-2 infected ( $10^6$  virus particles/organoid as determined in Vero cells) *NRP1* WT and *NRP1* KO kidney organoids. Representative confocal images show the detection of ACE2 (green), viral nuclear protein (NP, red), LTL (grey) and DAPI (blue). Scale bars, 250  $\mu$ m.
- F) Quantitative real time analysis was performed at 3 dpi in Mock treated or SARS-CoV-2 infected ( $10^6$  virus particles/organoid as determined in Vero cells) *NRP1* WT and *NRP1* KO specimens for the detection of SARS-CoV-2 mRNA expression levels. The data are represented as mean  $\pm$  s.d.  $n = 1$  independent experiment from a pool of 12 organoids/group with at least two technical replicates each.

**A**

|                | Non Diabetic | Diabetic    |
|----------------|--------------|-------------|
| Age (yr)*      | 58.0 ± 23.07 | 71.3 ± 5.86 |
| Sex, F/M       | 1/2          | 0/3         |
| Diabetic onset | N/A          | Type 2      |

\* Mean ± SD

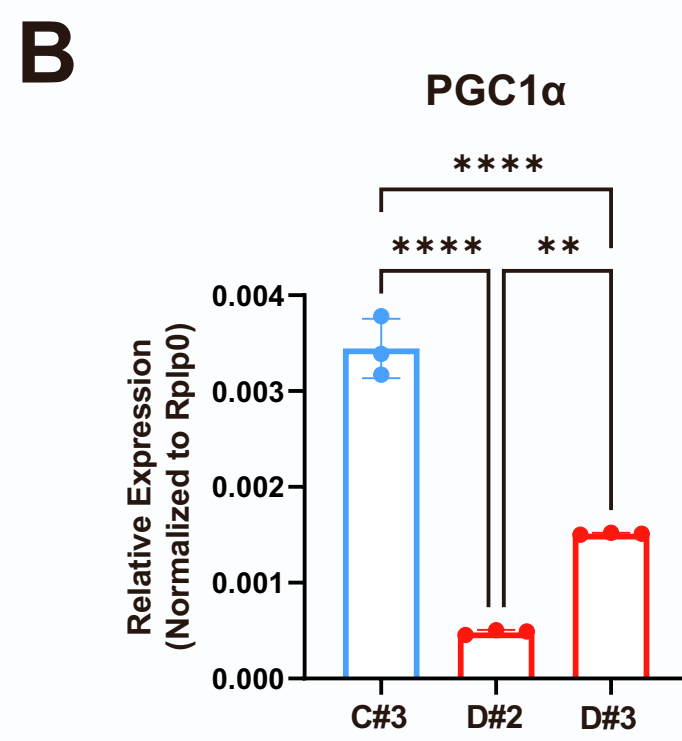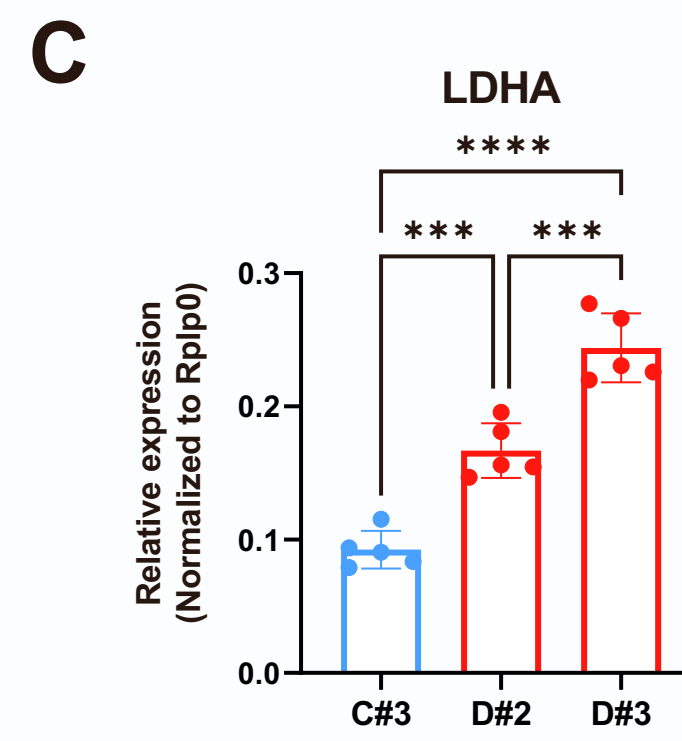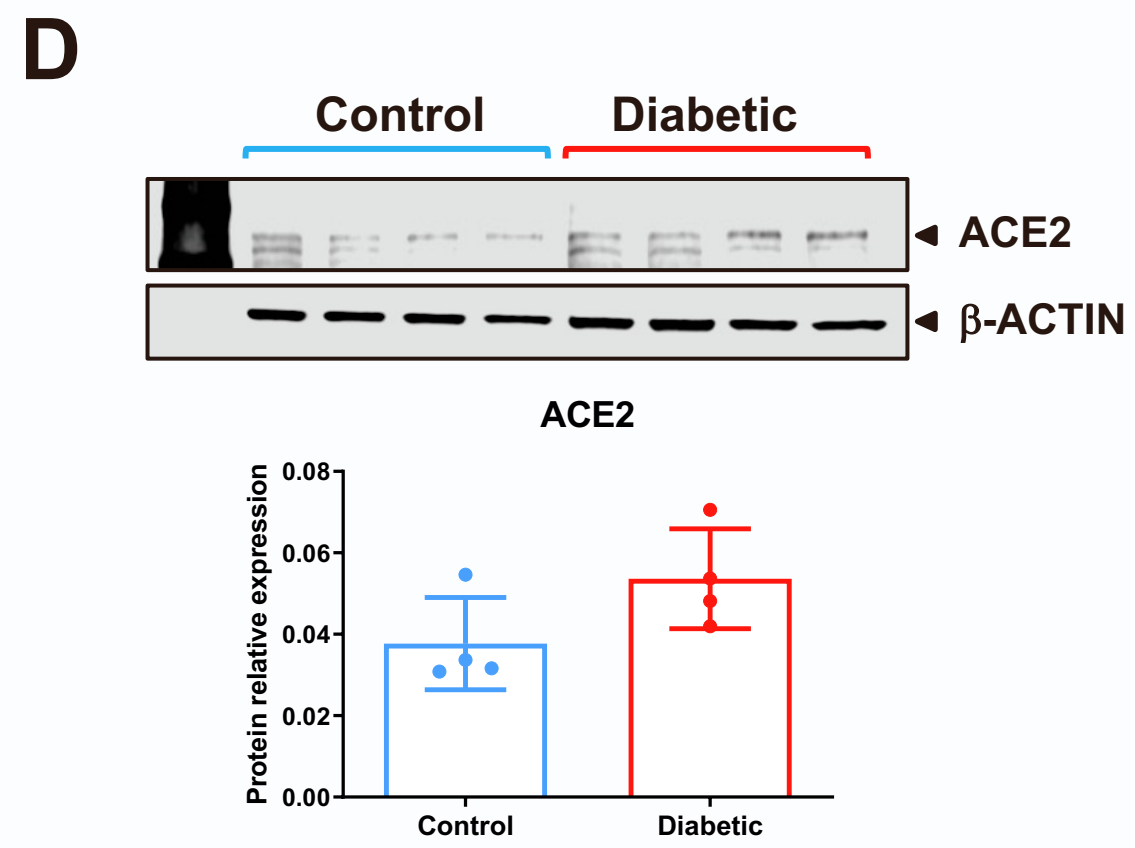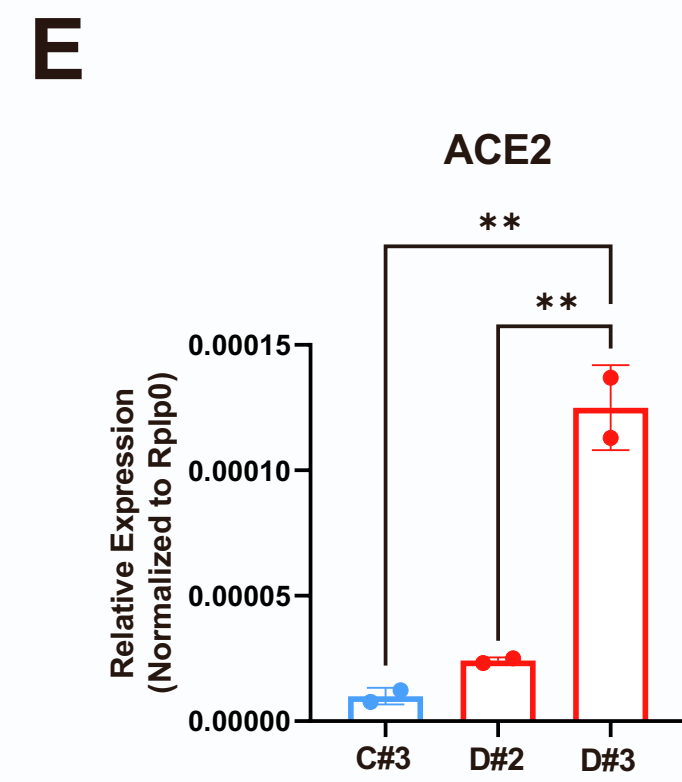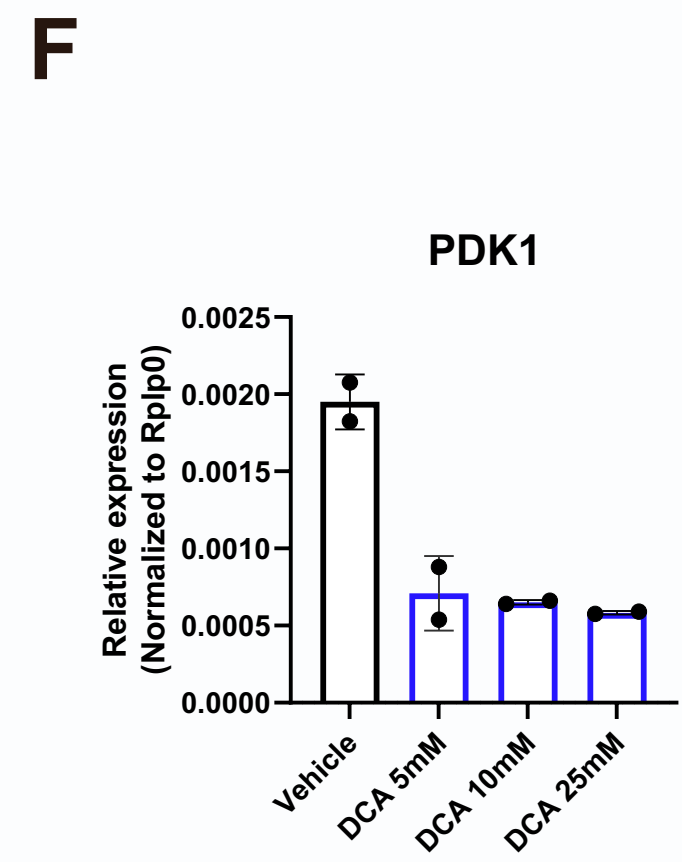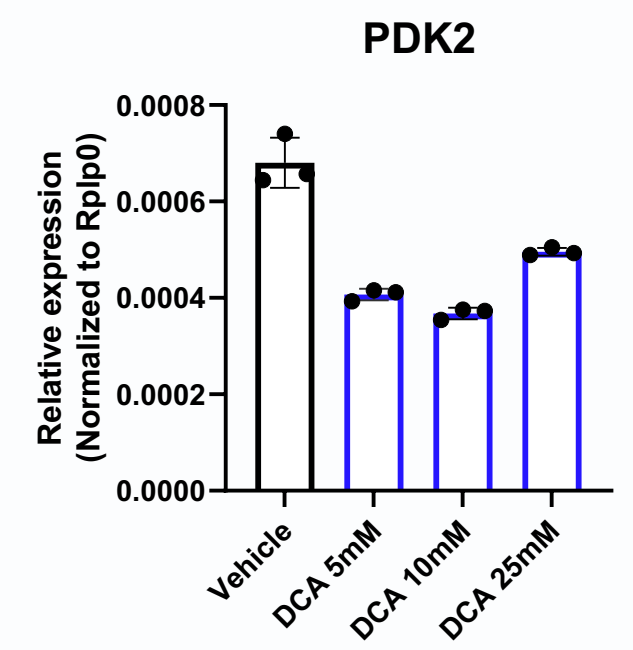

**Figure S9. SARS-CoV-2 Infection in Patient Kidney Cells, Related to Figure 7.**

- A) Characteristics of non-diabetic (control) and diabetic patients, from which primary human proximal tubular cells (HPTCs) were isolated and used in this study.
- B) mRNA expression levels of *PGC1 $\alpha$*  in Control and Diabetic HPTCs determined by qPCR. The data are presented as mean  $\pm$  s.d. of at least  $n = 1$  independent biological replicate per condition with three technical replicates each.  $**P < 0.005$ ,  $****P < 0.0001$ , One-way ANOVA, Tukey's multiple comparisons test.
- C) mRNA expression levels of *LDHA* by qPCR in Control and Diabetic HPTCs. The data are presented as mean  $\pm$  s.d. of at least  $n = 1$  independent biological replicate per condition with five technical replicates each.  $***P < 0.001$ ,  $****P < 0.0001$ , One-way ANOVA, Tukey's multiple comparisons test.
- D) Protein levels of ACE2 in HPTCs from Control and Diabetic donors as determined by Western blotting.  $\beta$ -ACTIN was used as loading control. The data are presented as mean  $\pm$  s.d. of  $n = 2$  independent biological replicates per condition with two technical replicates each.
- E) mRNA expression levels of *ACE2* by qPCR in Control and Diabetic HPTCs. The data are presented as mean  $\pm$  s.d. of at least  $n = 1$  independent experiment with two technical replicates each.  $**P < 0.005$ , One-way ANOVA, Tukey's multiple comparisons test.
- F) mRNA expression levels of *PDK1* and *PDK2* in HPTCs after treatment with different doses of dichloroacetate (DCA) or vehicle, determined by qPCR. The data are presented as mean  $\pm$  s.d. of  $n = 1$  independent experiment with at least two technical replicates each.
